# Supplementary material for: Regiospecific formation of sugar-derived ketonitrone towards unconventional C-branched pyrrolizidines and indolizidines
Source: Royal Society of Chemistry journal article supplement (doi:10.1039/c9ob01419e), 2019-01-01

## Electronic Supplementary Material

### Regiospecific formation of sugar-derived ketonitrone towards unconventional C-branched pyrrolizidines and indolizidines.

Fabien Massicot,<sup>a</sup> Gatien Messire,<sup>a</sup> Alexis Vallée,<sup>a</sup> Jean-Luc Vasse,<sup>a</sup> Sandrine Py<sup>b</sup> and Jean-Bernard Behr<sup>\*a</sup>

---

<sup>a</sup> Univ. Reims Champagne-Ardenne, ICMR, CNRS UMR 7312, FR Condorcet CNRS 3417, 51687 Reims Cedex 2, France.

<sup>b</sup> Univ. Grenoble Alpes, DCM, F-38000 Grenoble, France CNRS, DCM, F-38000 Grenoble, France.  
E-mail: [jb.behr@univ-reims.fr](mailto:jb.behr@univ-reims.fr)

## Table of Contents

|                                                                                            |               |
|--------------------------------------------------------------------------------------------|---------------|
| <b><sup>1</sup>H, <sup>13</sup>C NMR spectra of nitron 10</b>                              | <b>p S3</b>   |
| <b><sup>1</sup>H, <sup>13</sup>C NMR spectra of pyrrolidines 11a,b (mixture)</b>           | <b>p S5</b>   |
| <b><sup>1</sup>H, <sup>13</sup>C NMR spectra of oximes 14 (R=H), 15 and 16</b>             | <b>p S7</b>   |
| <b><sup>1</sup>H, <sup>13</sup>C NMR spectra of hydroxylamines 17,18,19</b>                | <b>p S13</b>  |
| <b><sup>1</sup>H, <sup>13</sup>C NMR spectra of adducts 20a,20b</b>                        | <b>p S19</b>  |
| <b><sup>1</sup>H, <sup>13</sup>C NMR spectra of compounds 21a,b (mixture)</b>              | <b>p S23</b>  |
| <b><sup>1</sup>H, <sup>13</sup>C NMR spectra of compounds 21b</b>                          | <b>p S25</b>  |
| <b><sup>1</sup>H, <sup>13</sup>C NMR spectra of N-allylamines 22a,22b,23a,23b</b>          | <b>p. S27</b> |
| <b><sup>1</sup>H, <sup>13</sup>C NMR spectra of bicyclic intermediates 24a,24b,25a,25b</b> | <b>p. S35</b> |
| <b><sup>1</sup>H, <sup>13</sup>C NMR spectra of tested compounds 5a,5b,6a,6b</b>           | <b>p. S43</b> |
| <b><sup>1</sup>H, <sup>13</sup>C NMR spectra of 7 (DAB) and 7,HCl</b>                      | <b>p. S51</b> |
| <b>Configuration of 20b, 21b, 5b, 6a and 6b (NOESY)</b>                                    | <b>p. S55</b> |

<sup>1</sup>H-NMR spectrum of 10 (CDCl<sub>3</sub>)

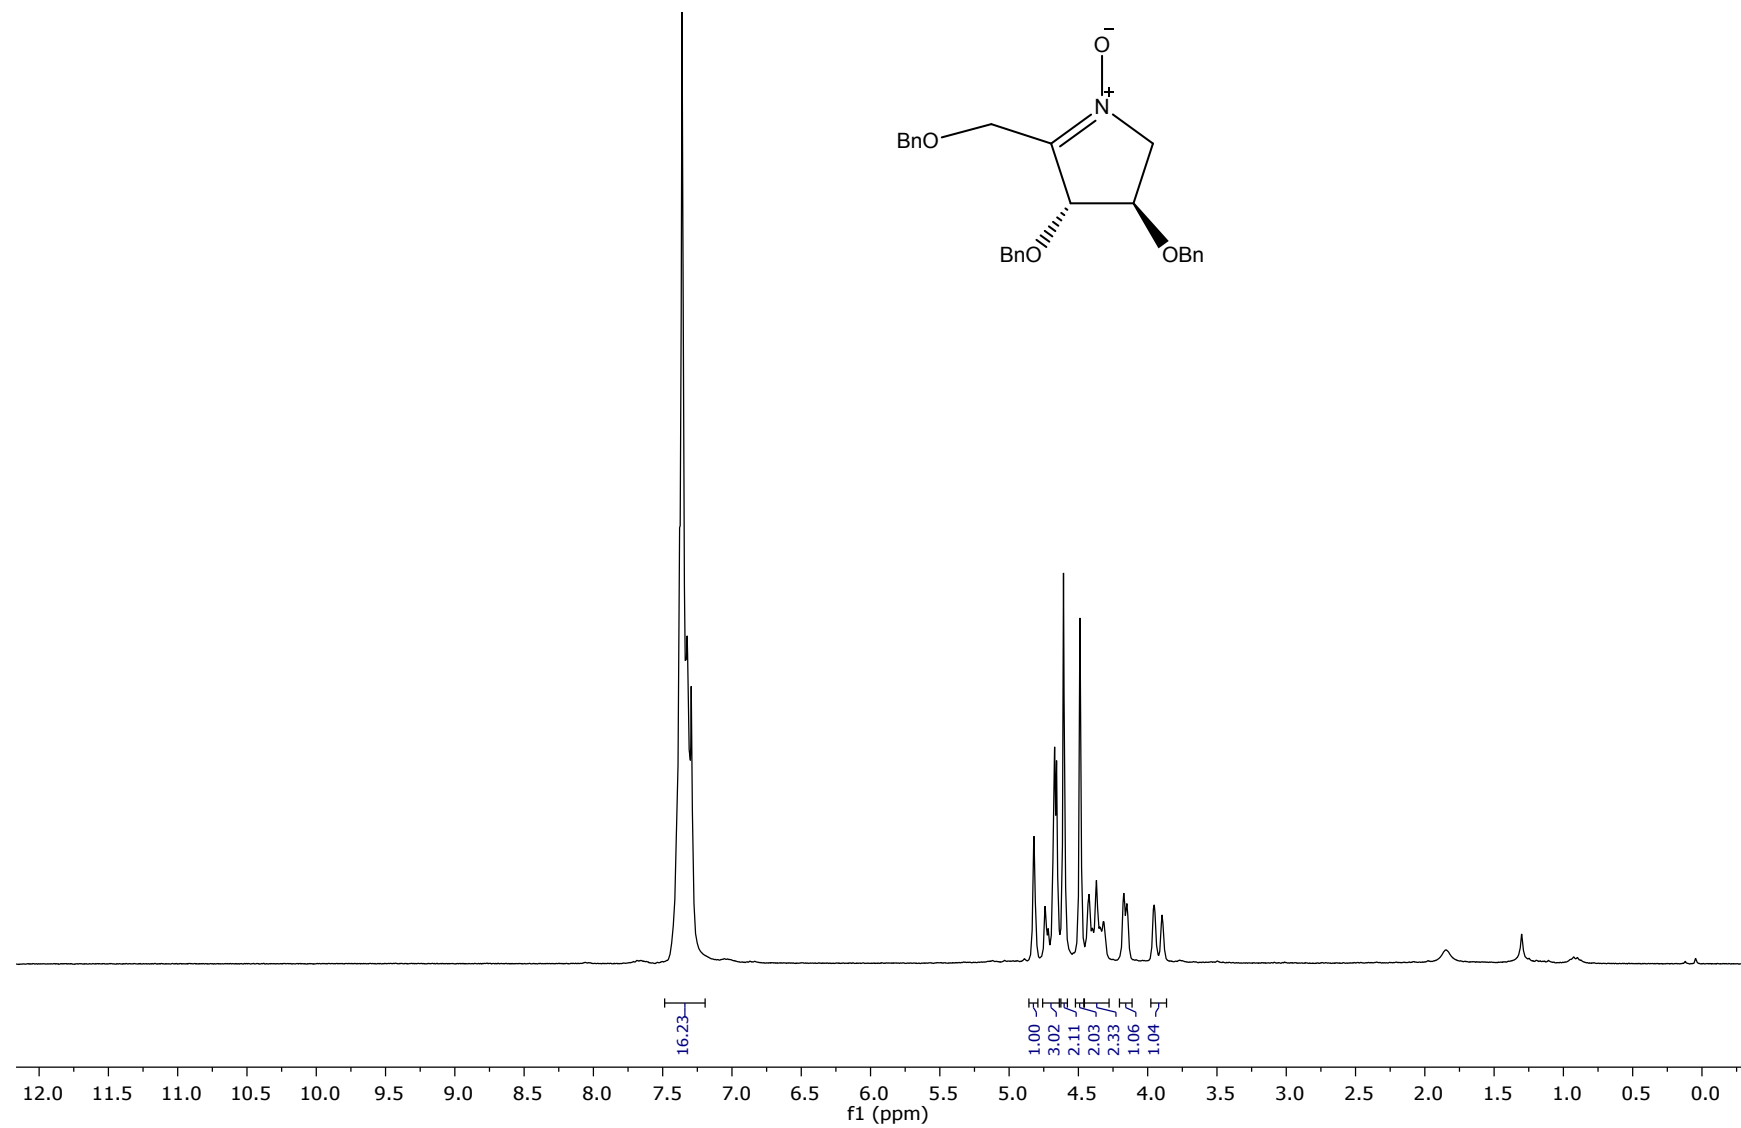

JMOD <sup>13</sup>C-NMR spectrum of 10 (CDCl<sub>3</sub>)

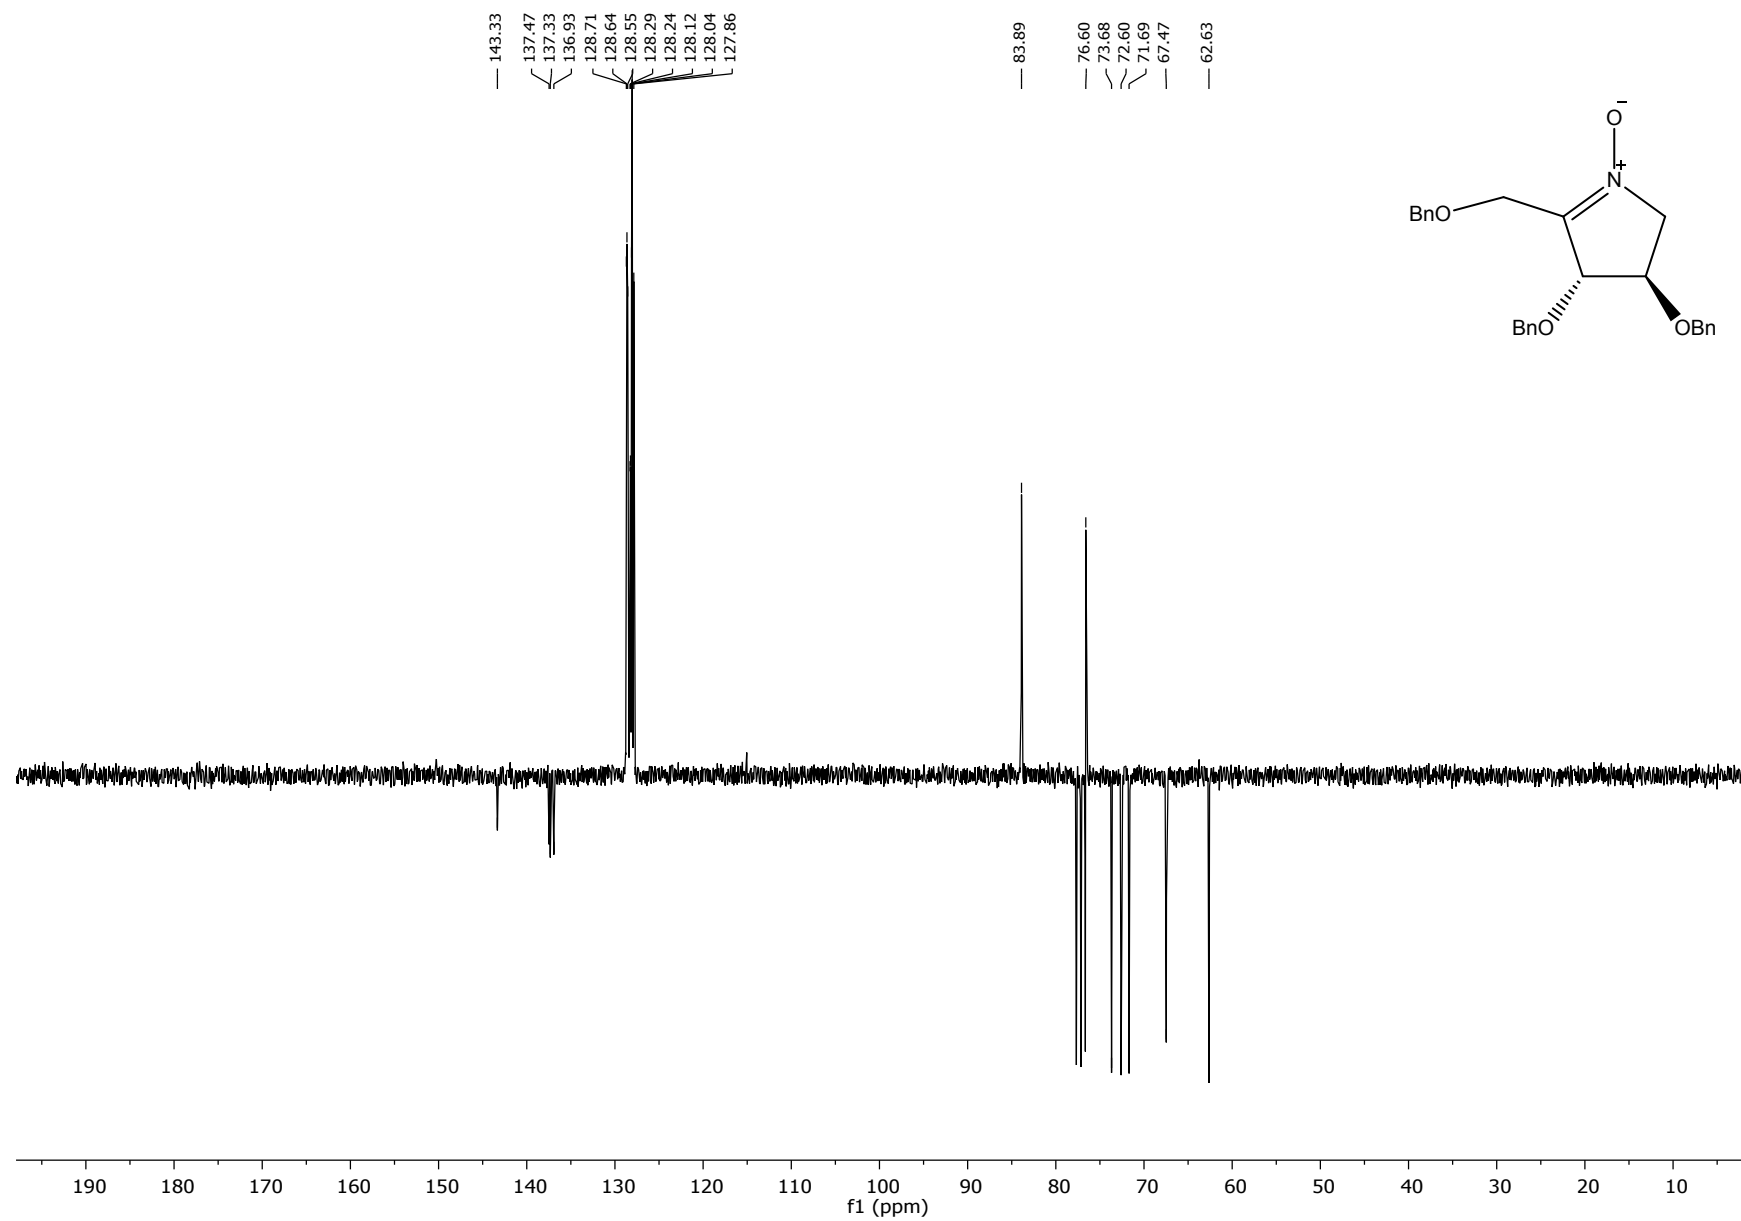

<sup>1</sup>H-NMR spectrum of mixture of 11a and 11b (CDCl<sub>3</sub>)

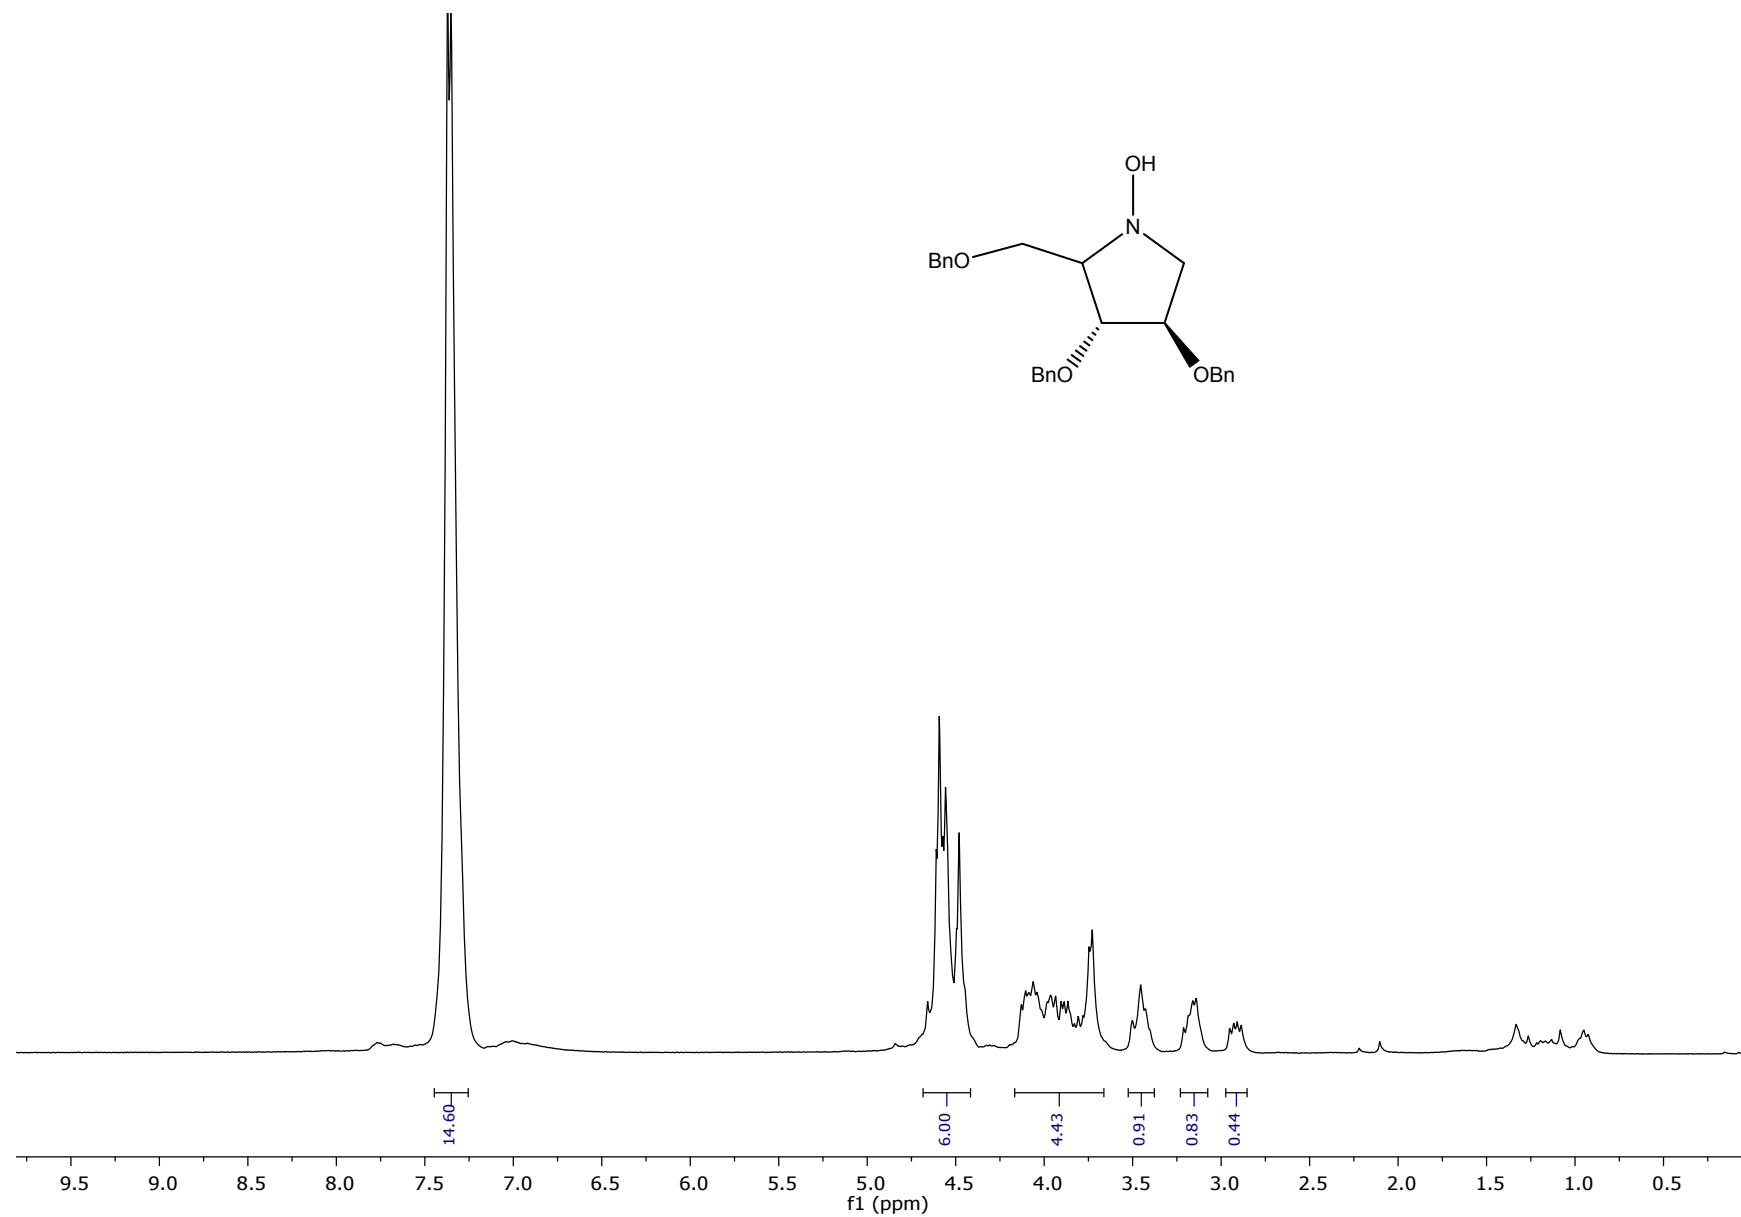

JMOD <sup>13</sup>C-NMR spectrum of mixture of 11a and 11b (CDCl<sub>3</sub>)

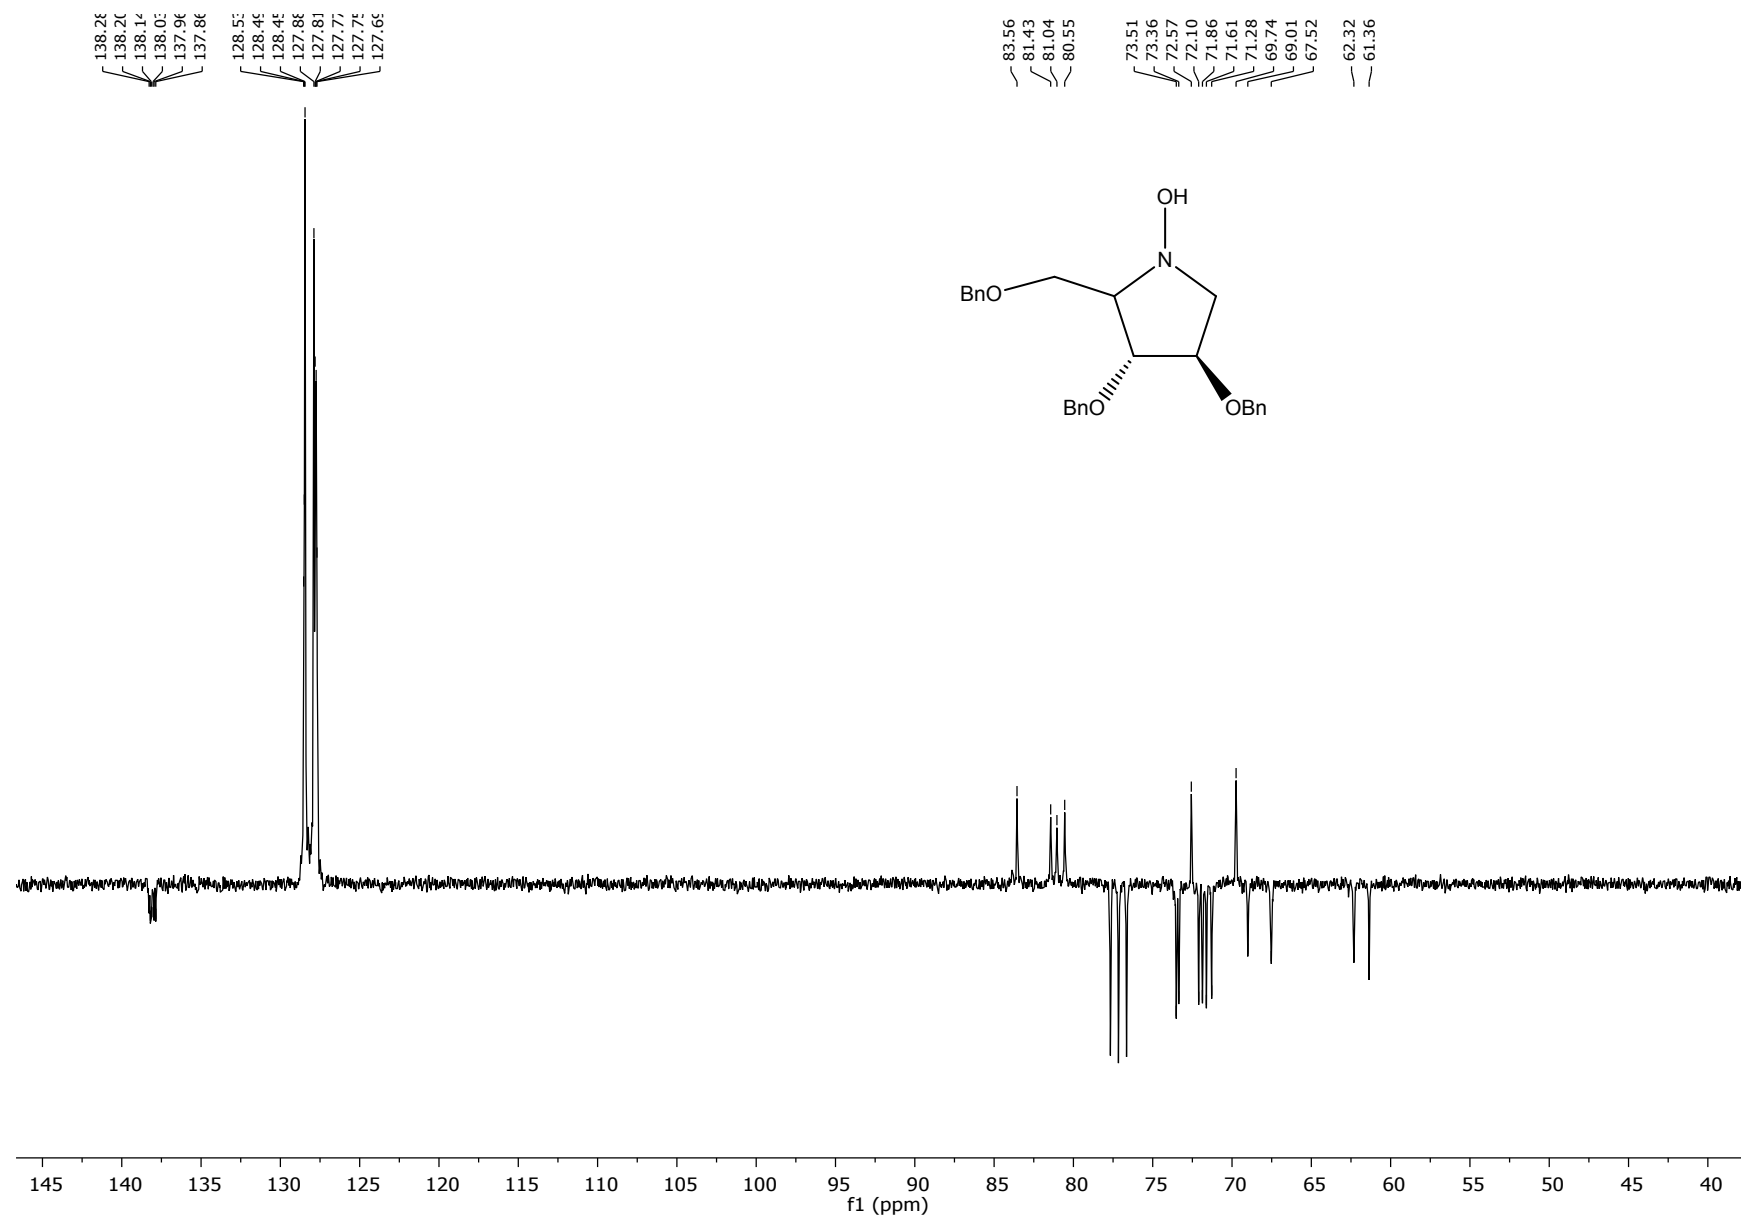



JMOD <sup>13</sup>C-NMR spectrum of the intermediate oxime 14 (R=H) (CDCl<sub>3</sub>)

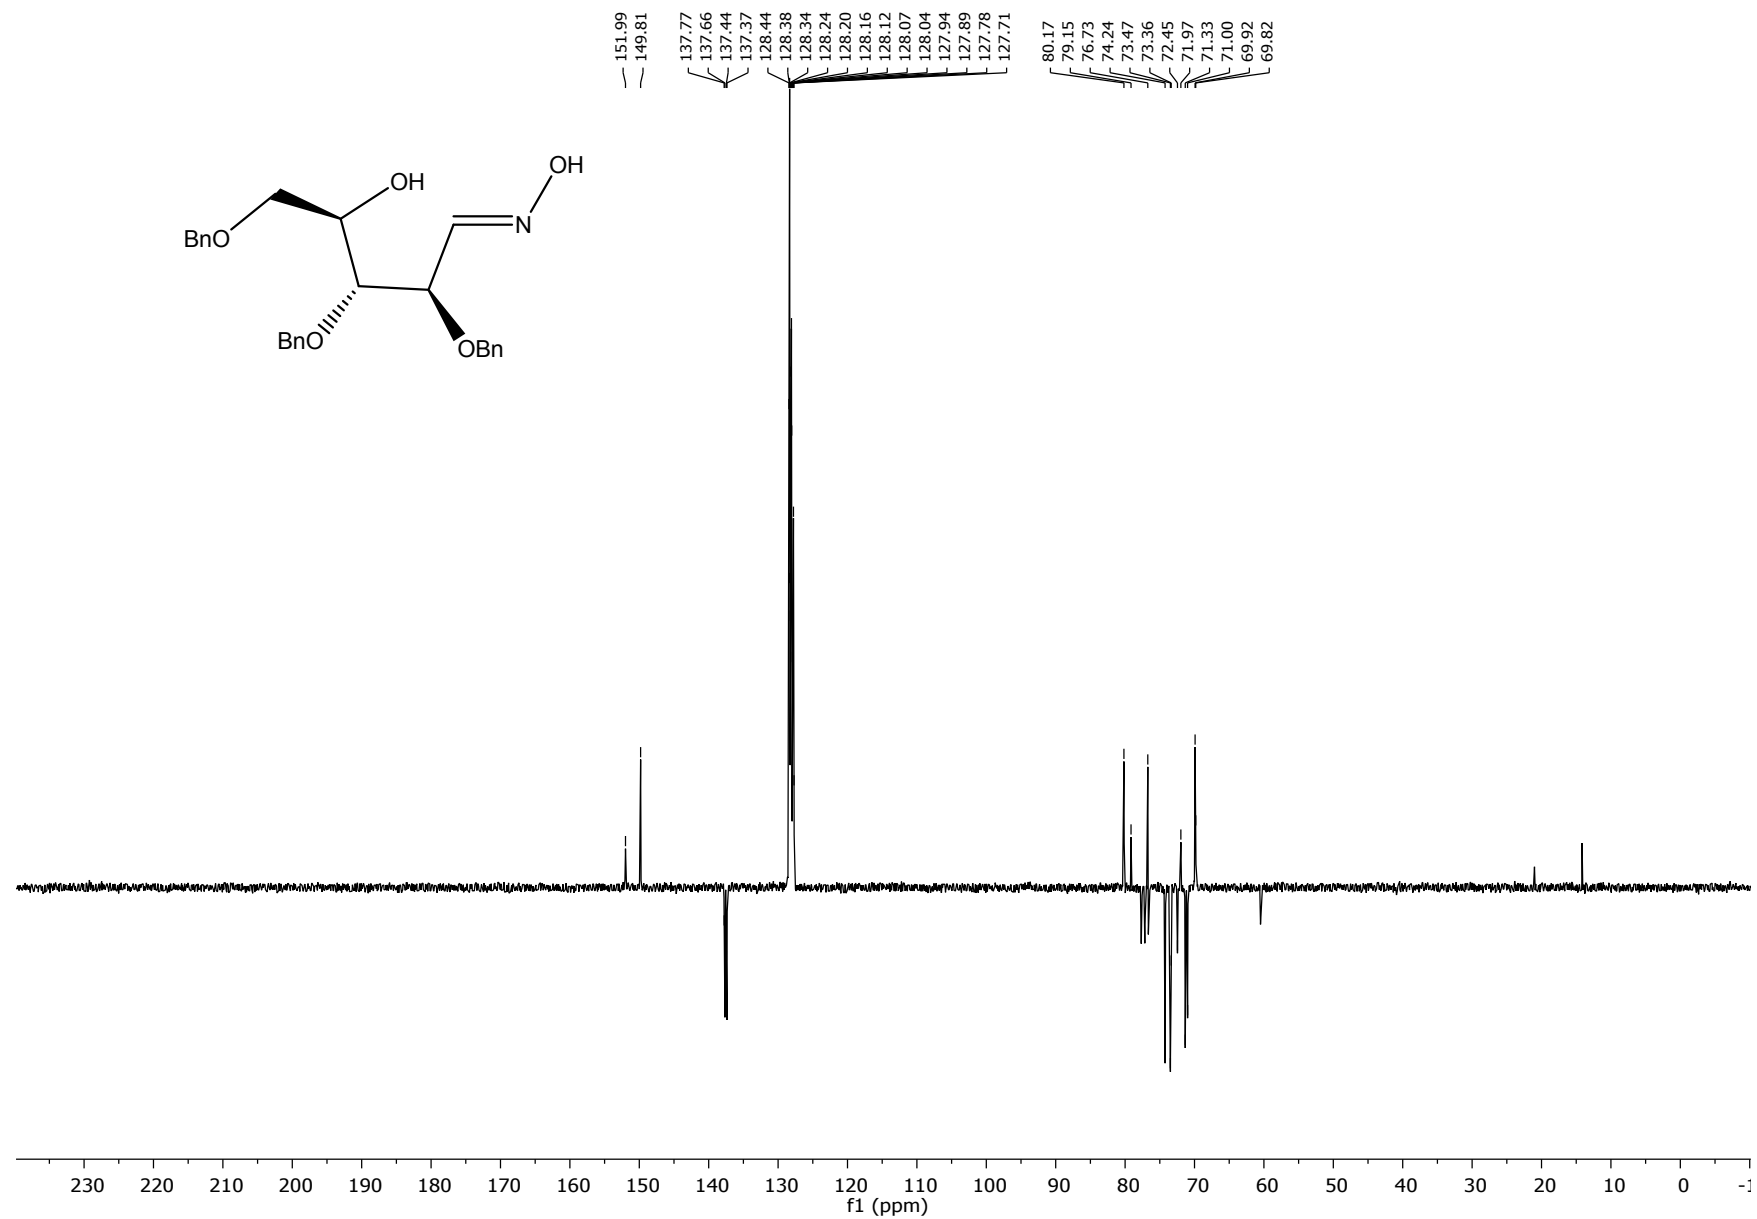





<sup>13</sup>C-NMR spectrum of 15 (CDCl<sub>3</sub>)

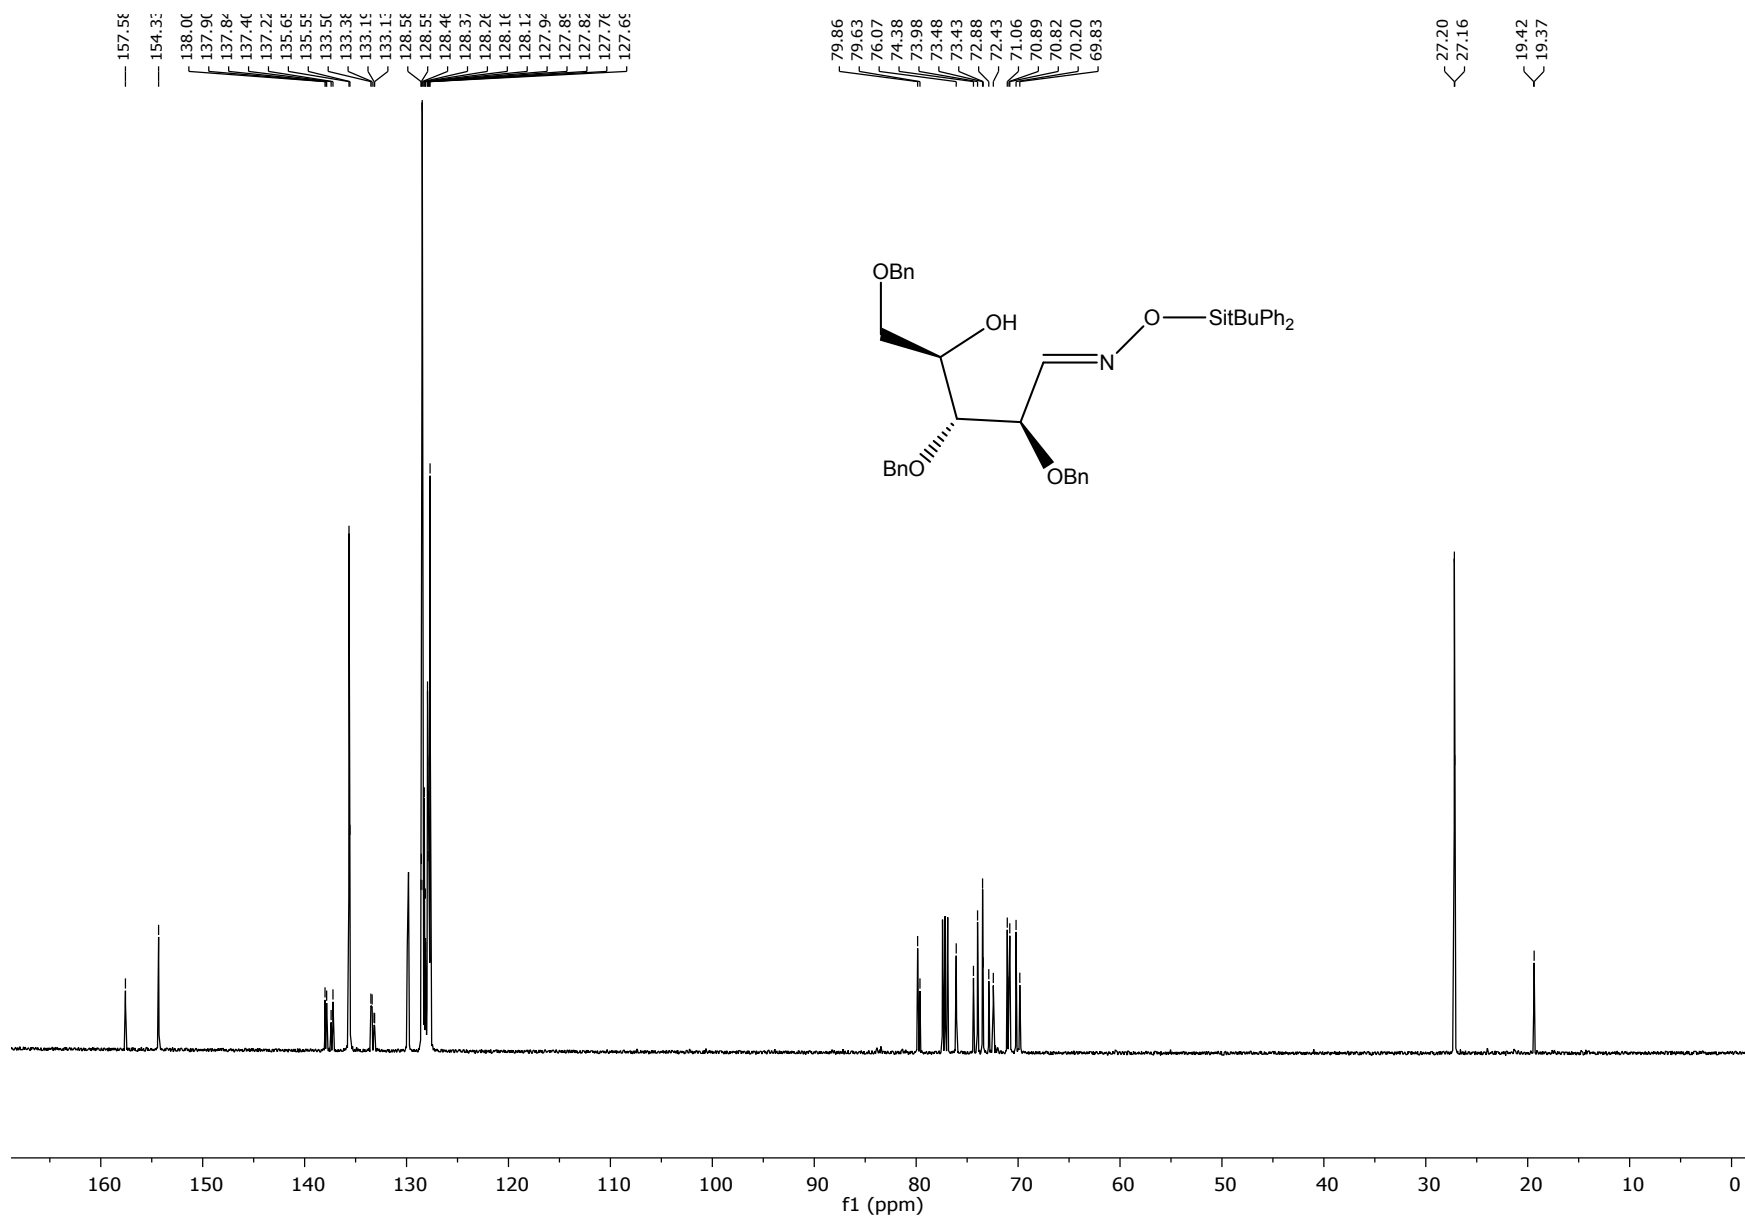

<sup>1</sup>H-NMR spectrum of 16 (CDCl<sub>3</sub>)

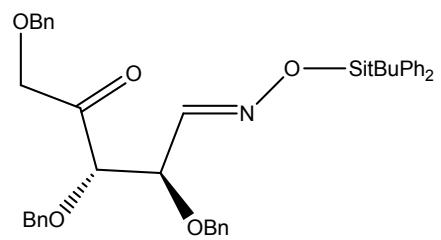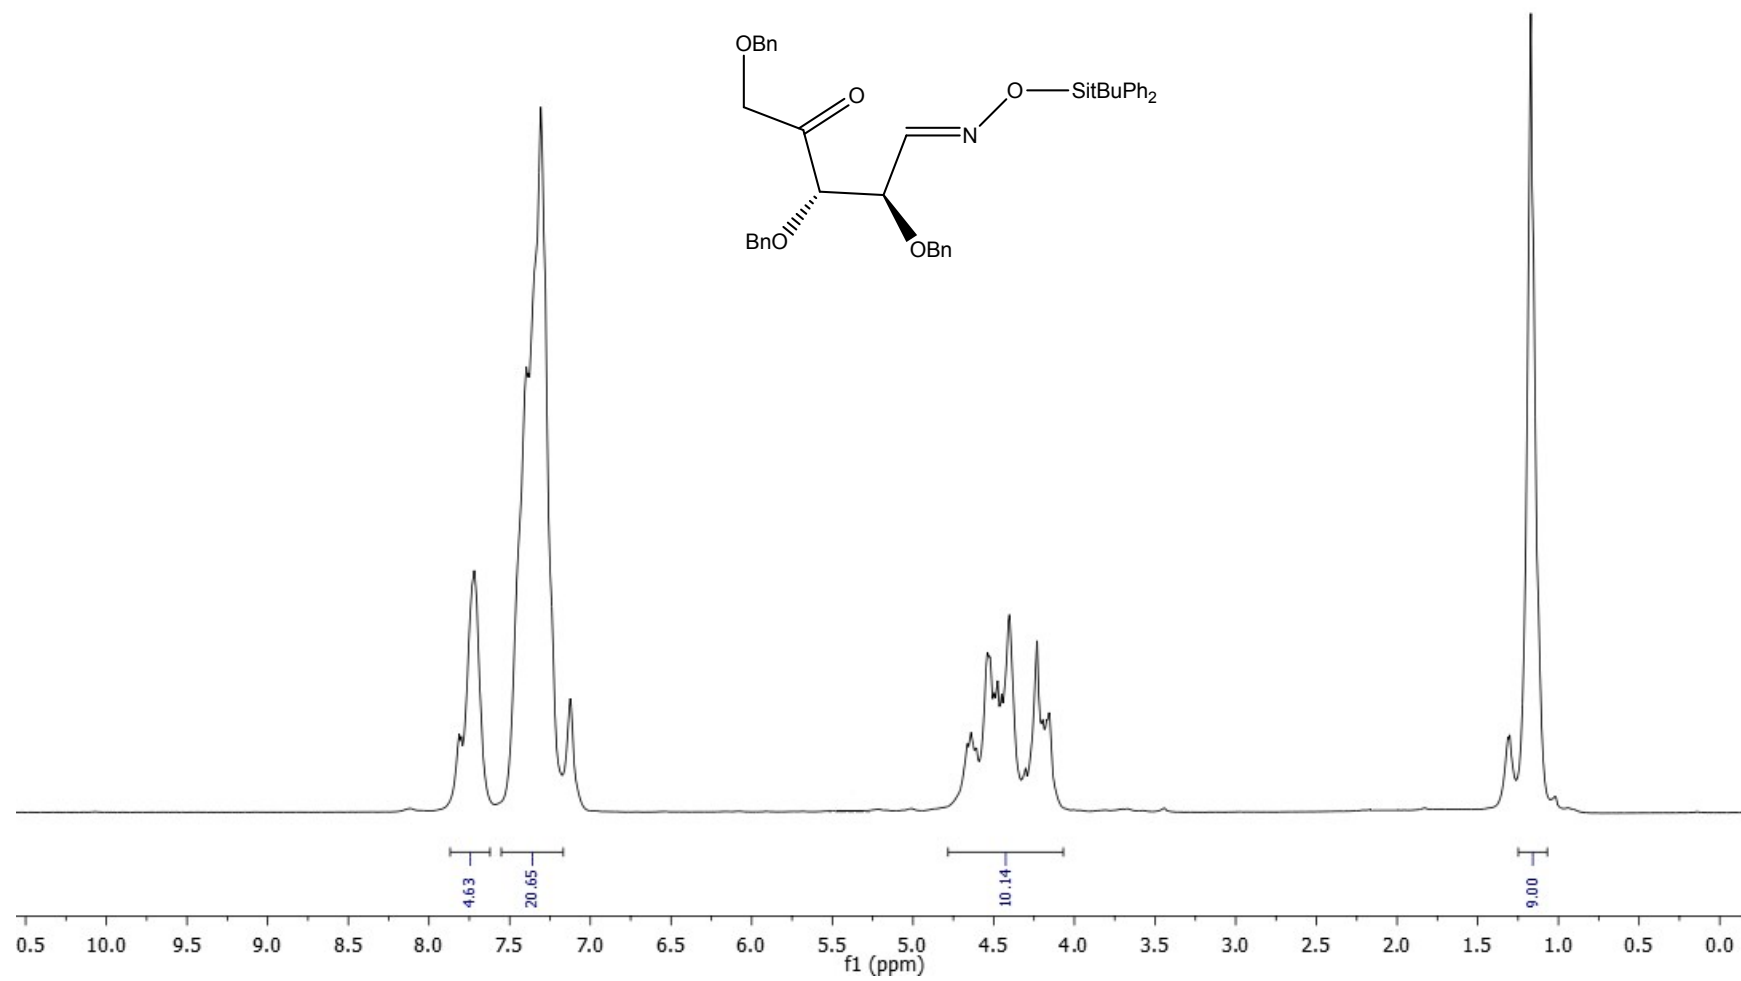

<sup>13</sup>C-NMR spectrum of 16 (CDCl<sub>3</sub>)

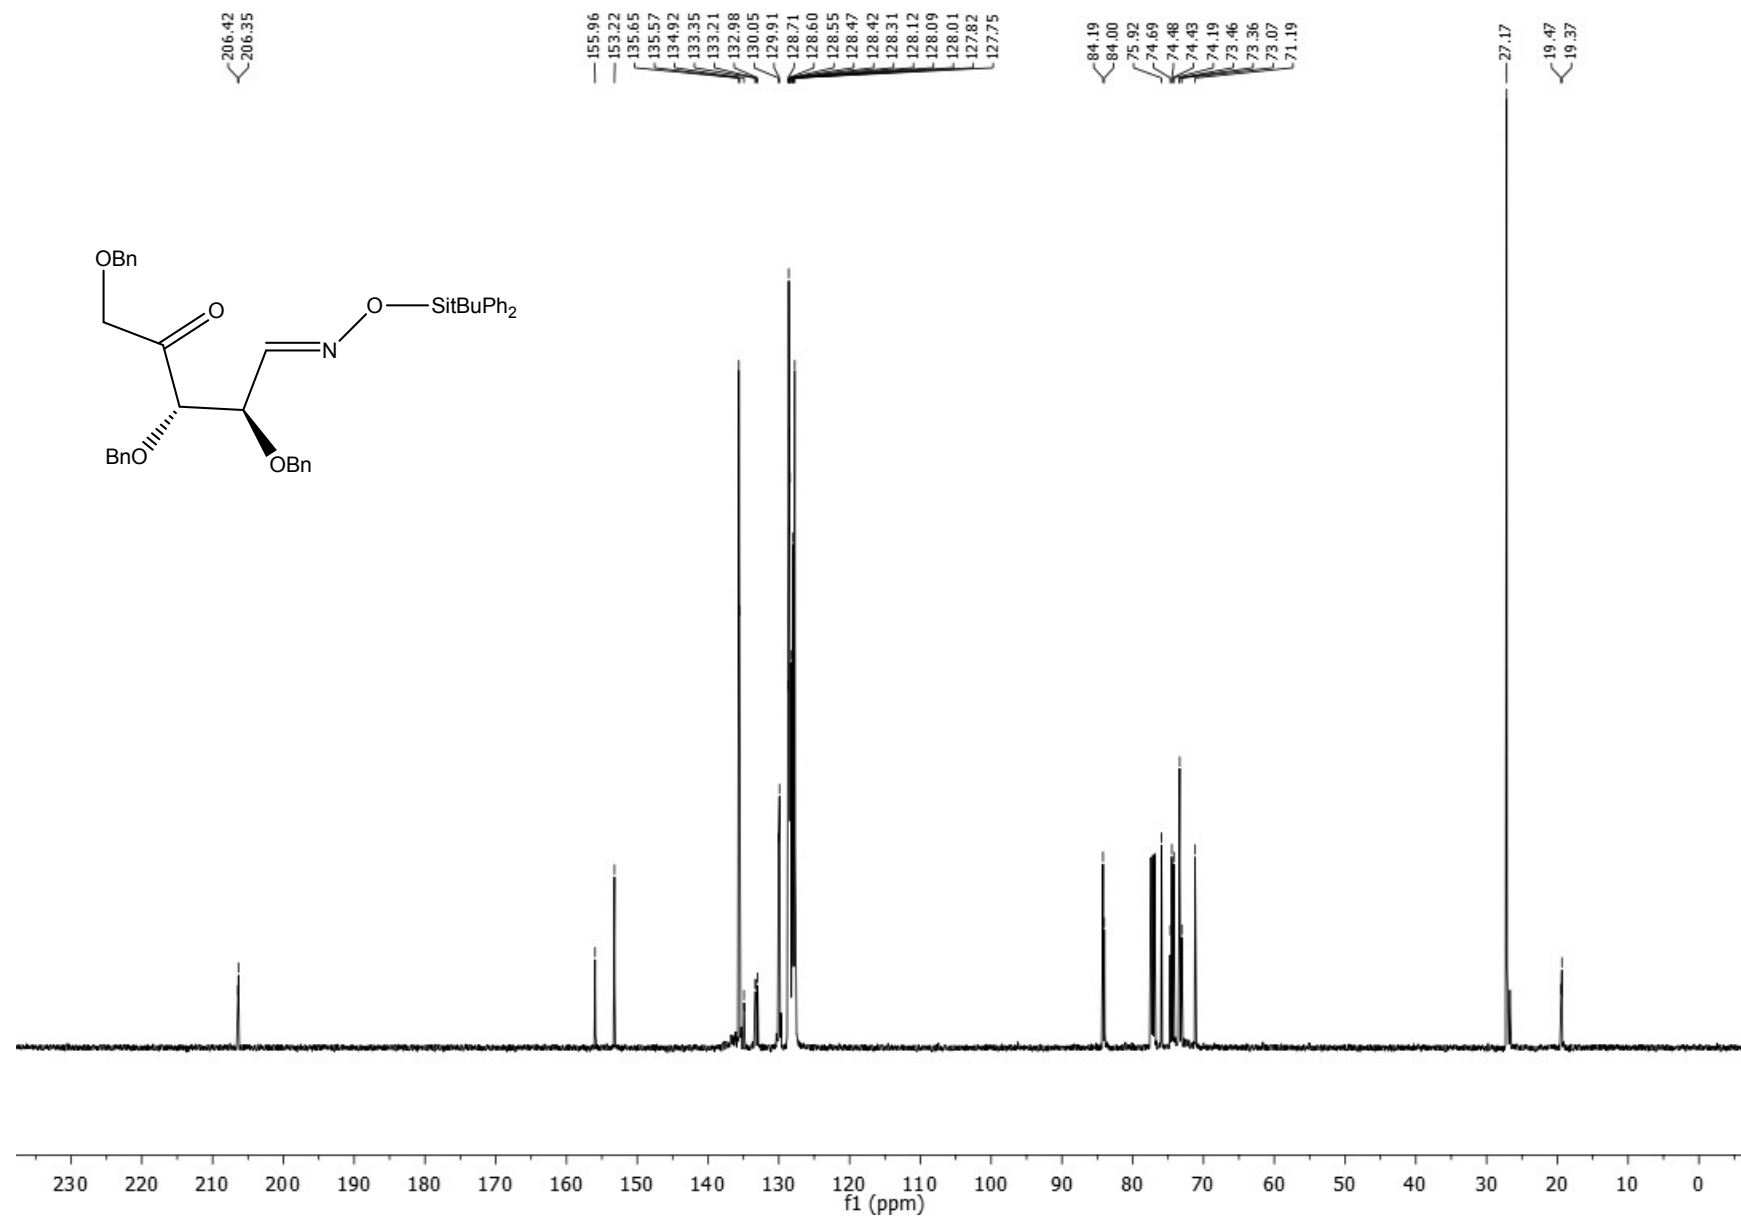



JMOD  $^{13}\text{C}$ -NMR spectrum of 17 ( $\text{CDCl}_3$ )

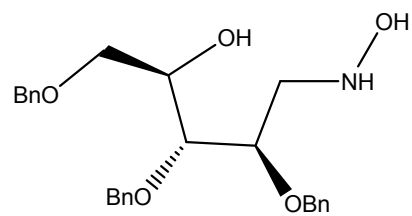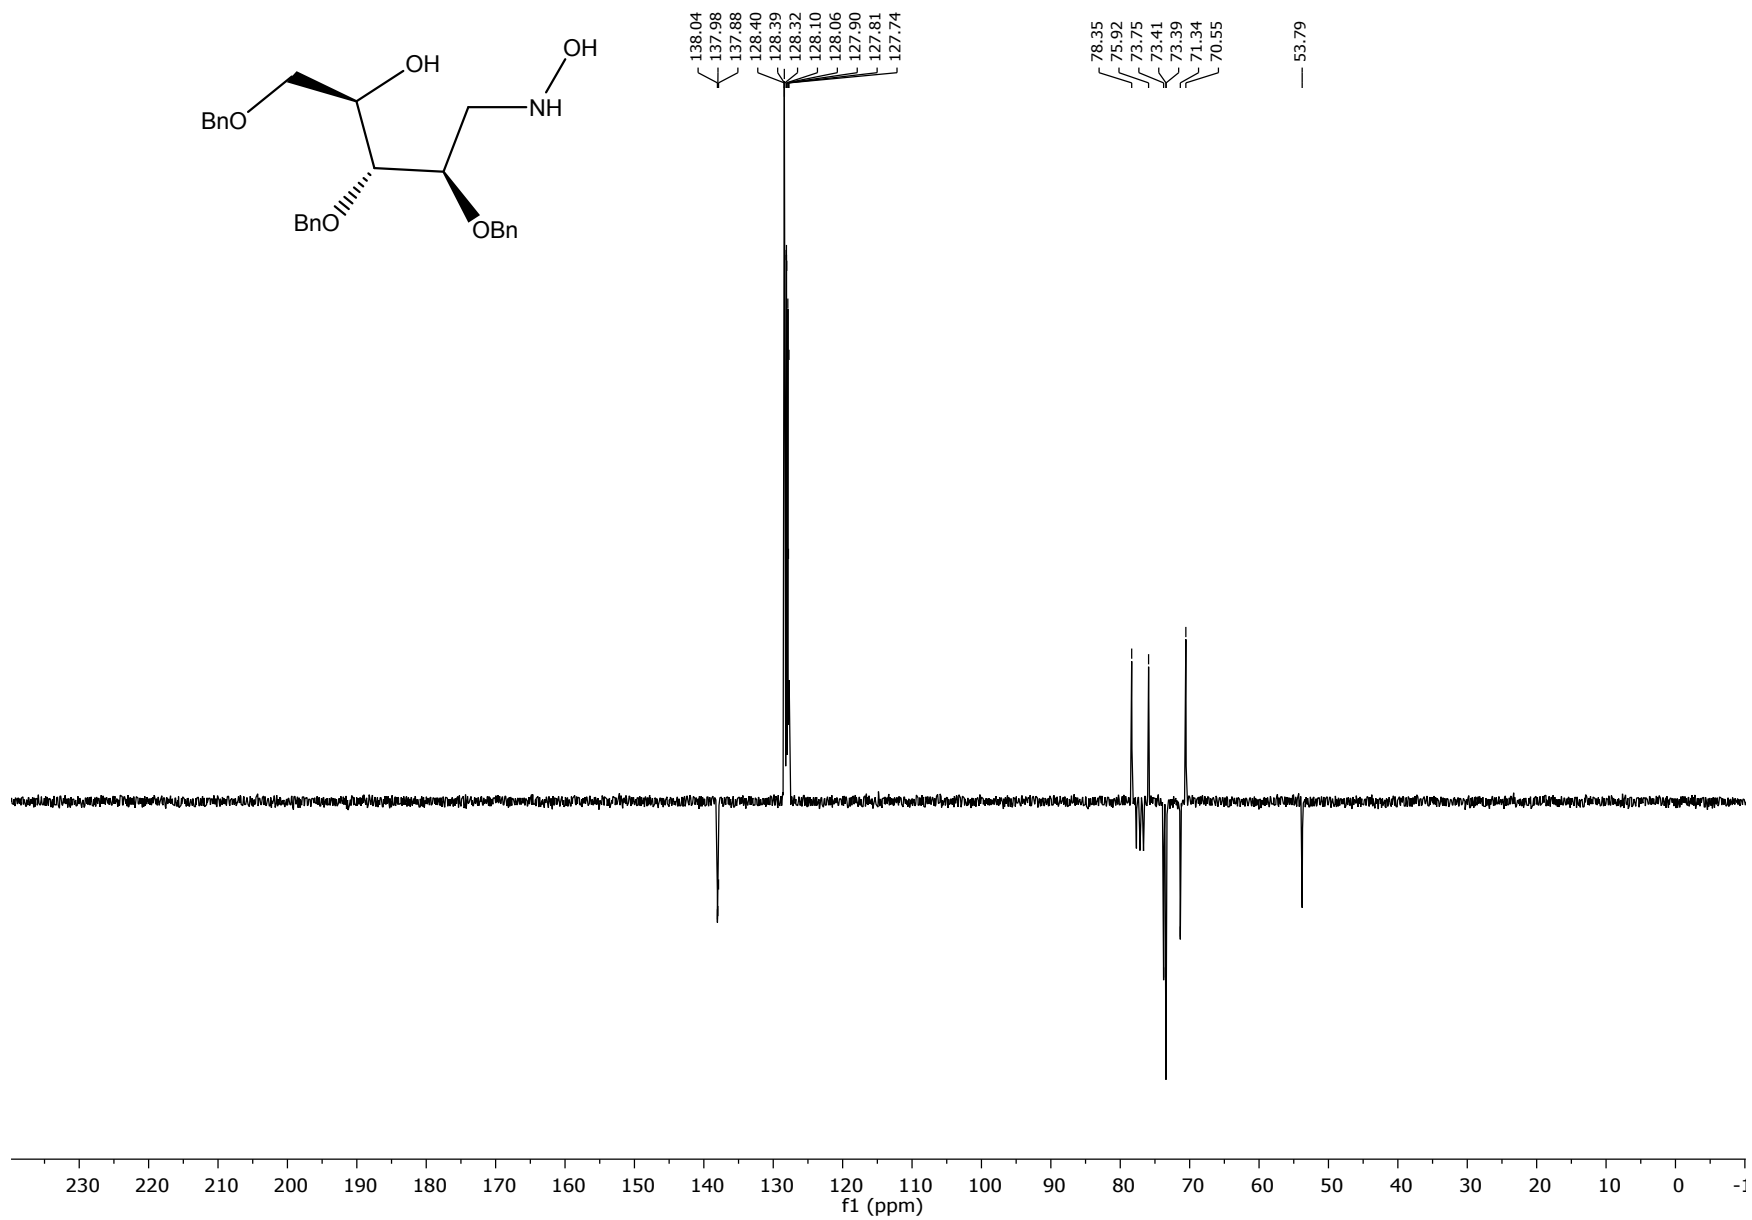



JMOD <sup>13</sup>C-NMR spectrum of 18 (CDCl<sub>3</sub>)

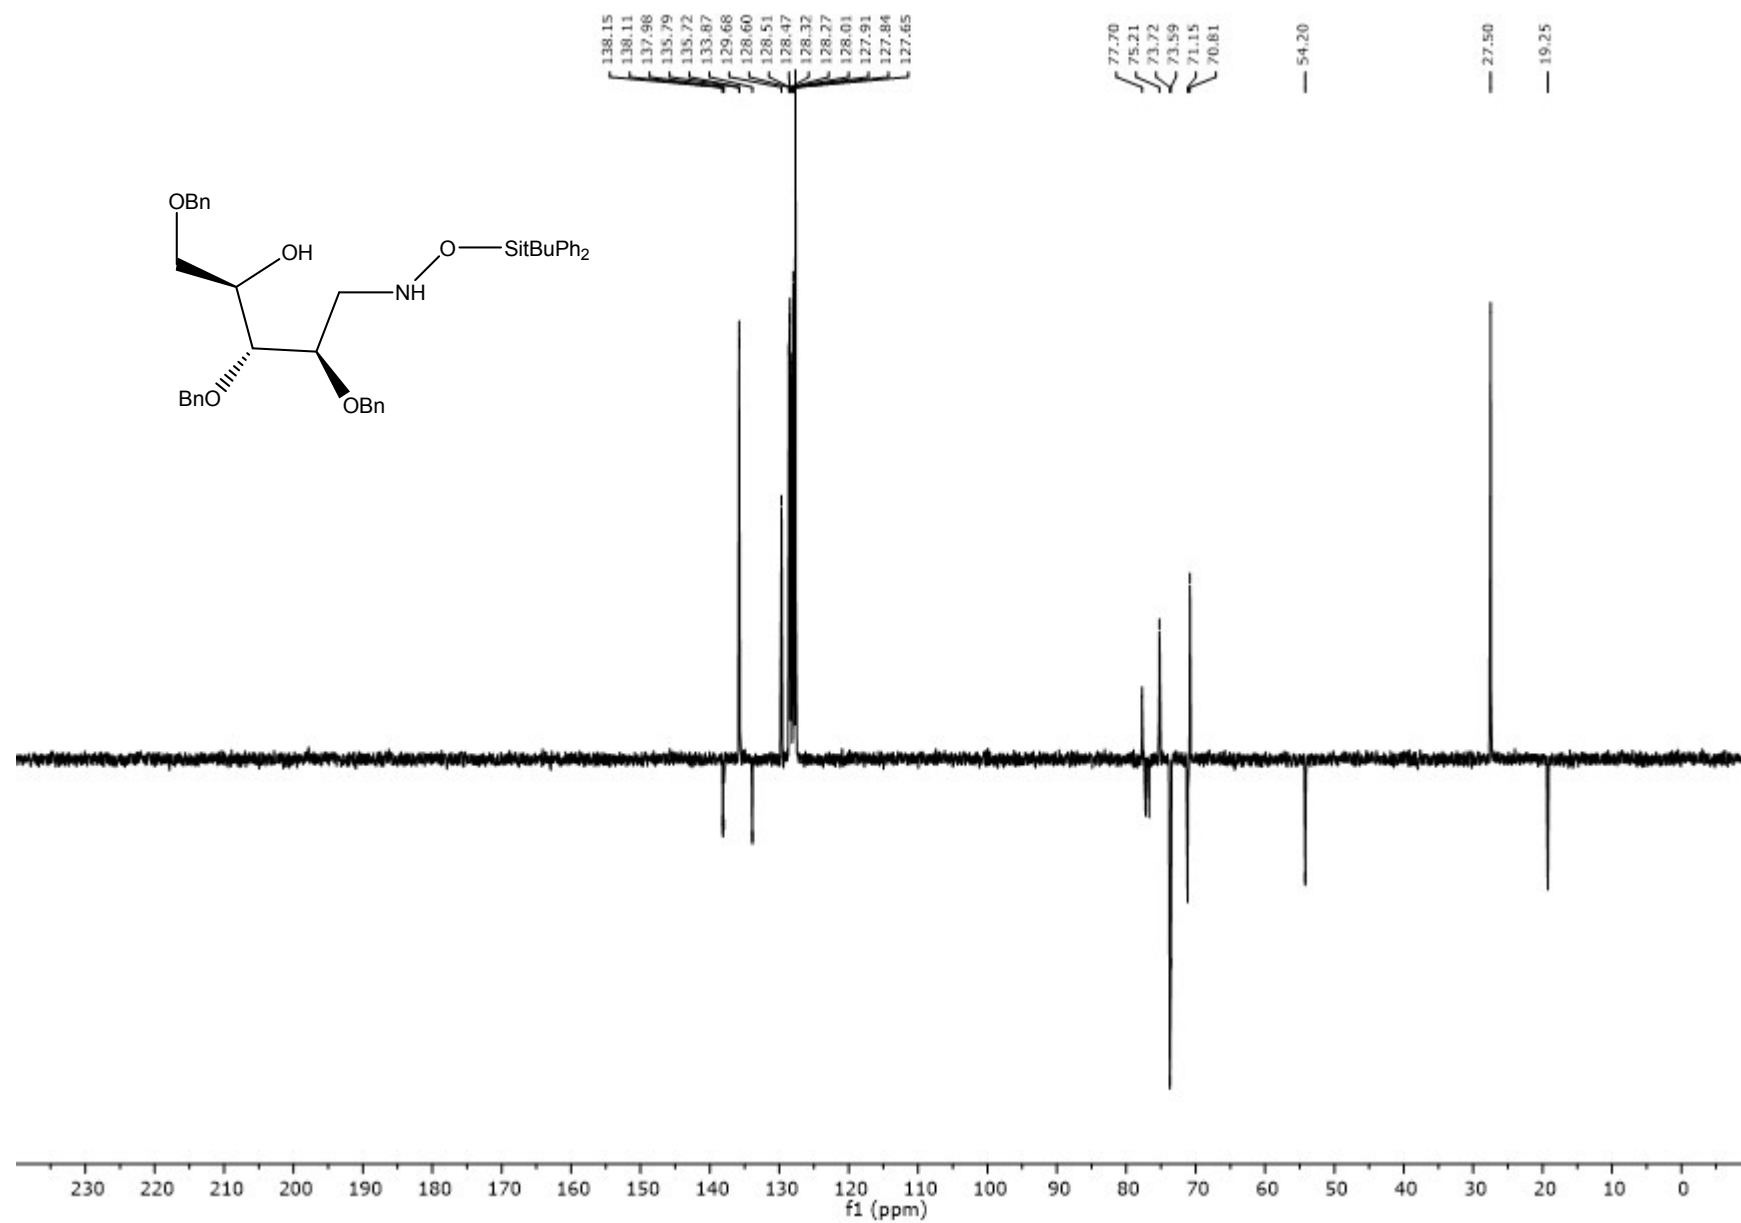



<sup>1</sup>H-NMR spectrum of 19 (DMSO-d<sub>6</sub>)

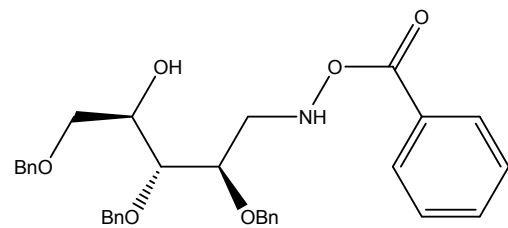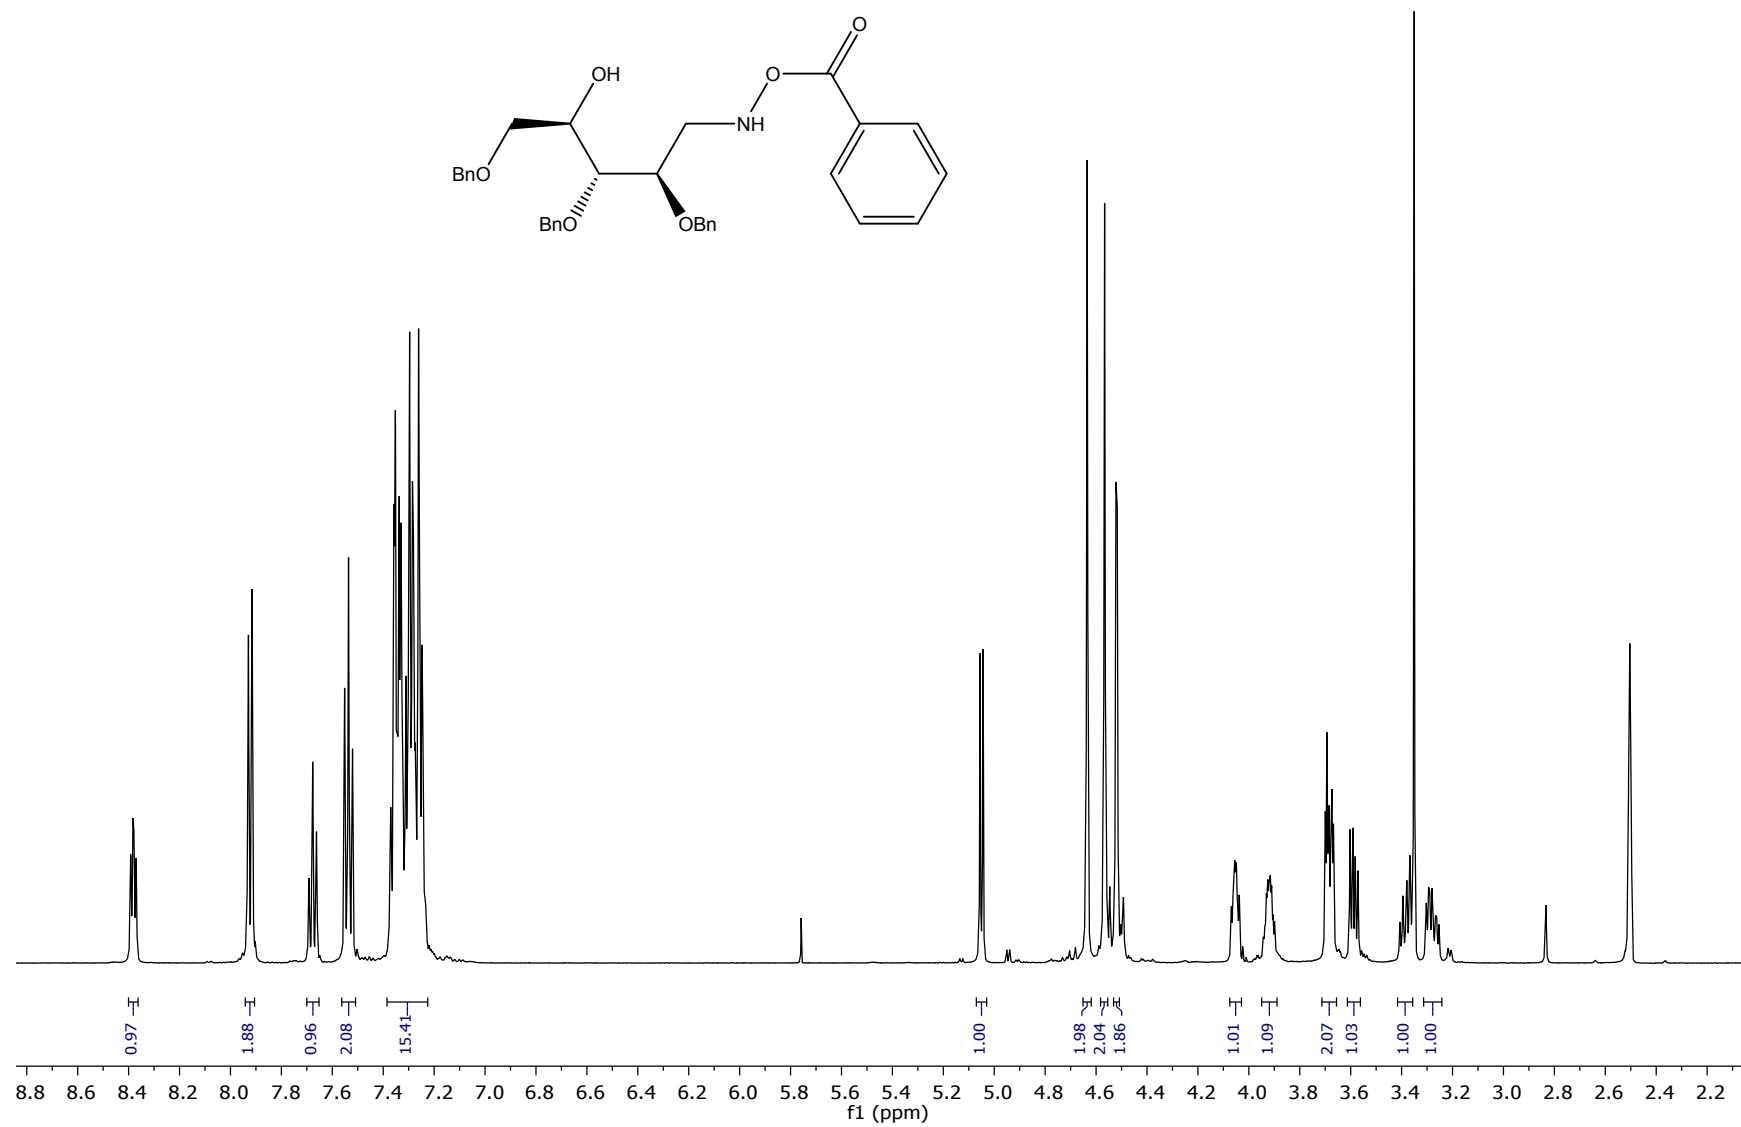

JMOD <sup>13</sup>C-NMR spectrum of 19 (DMSO-d<sub>6</sub>)

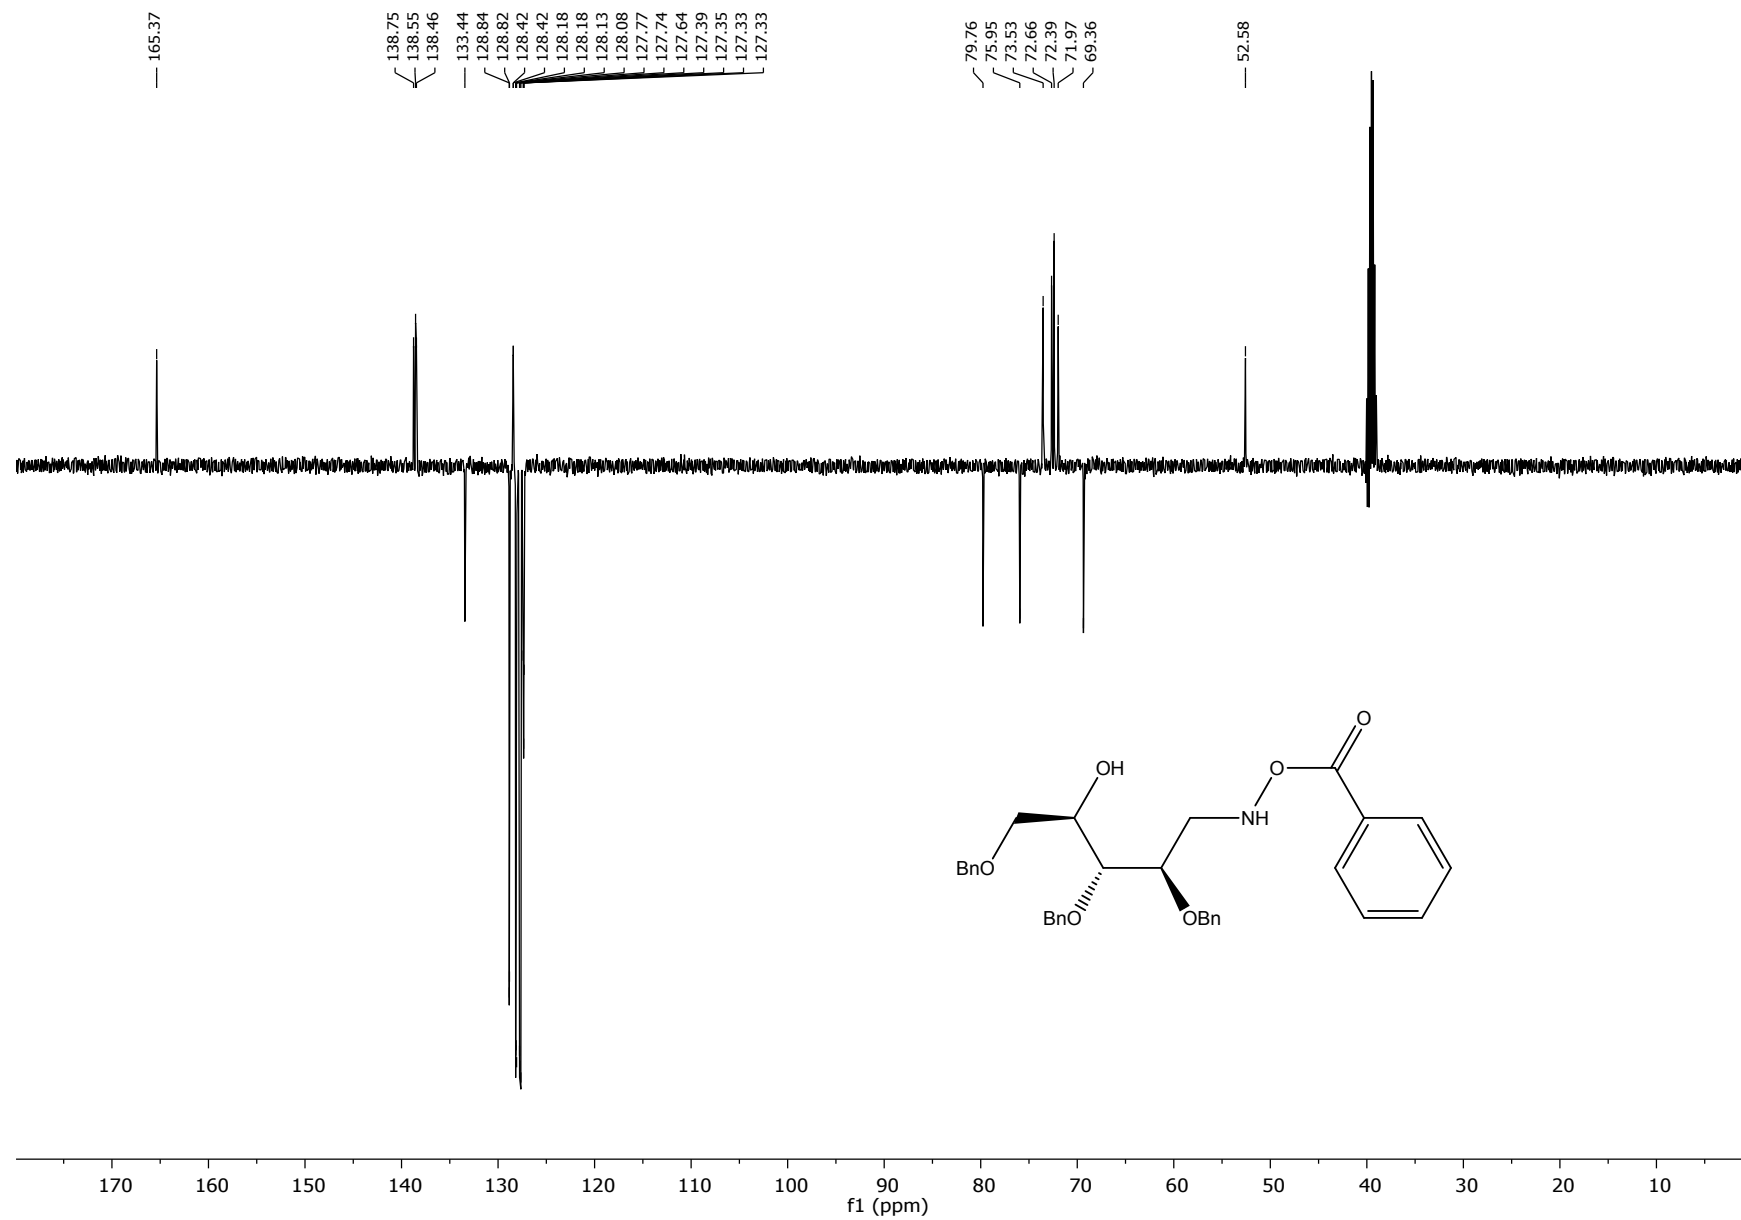

<sup>1</sup>H-NMR spectrum of 20a (CDCl<sub>3</sub>)

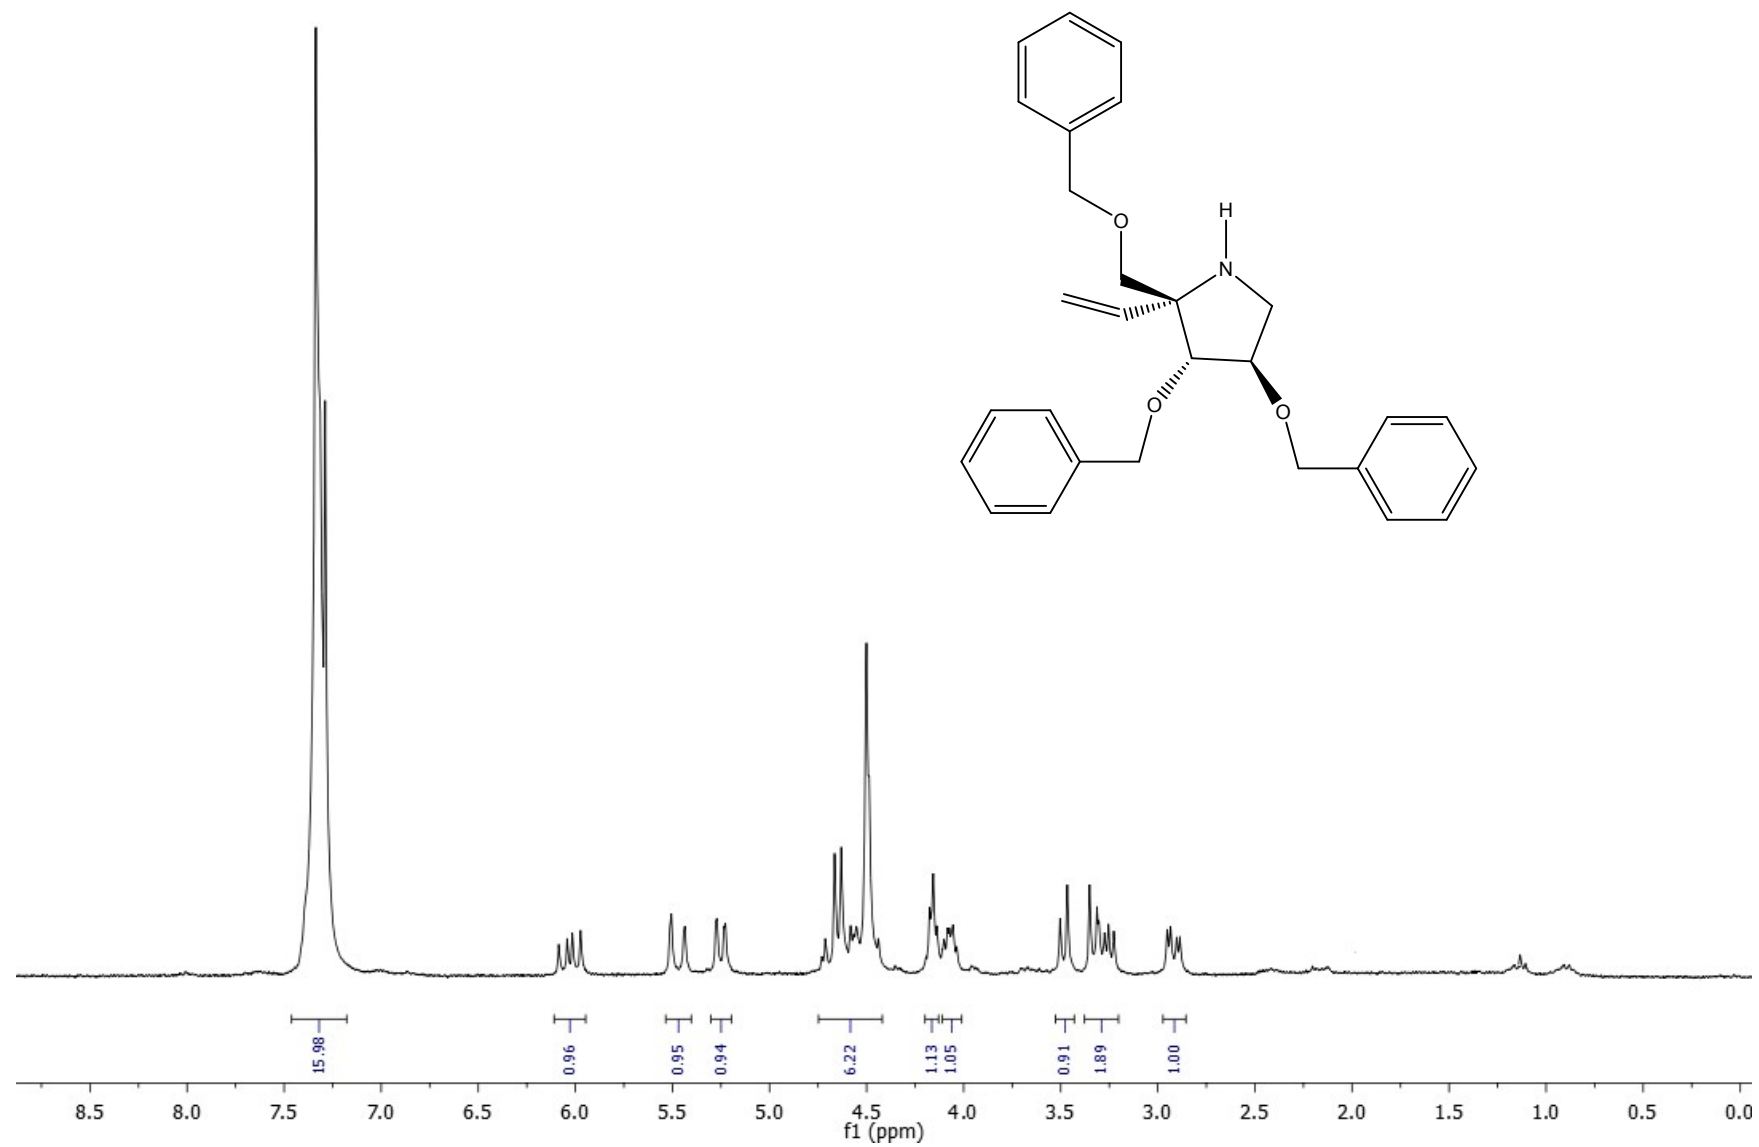

<sup>13</sup>C-NMR spectrum of 20a (CDCl<sub>3</sub>)

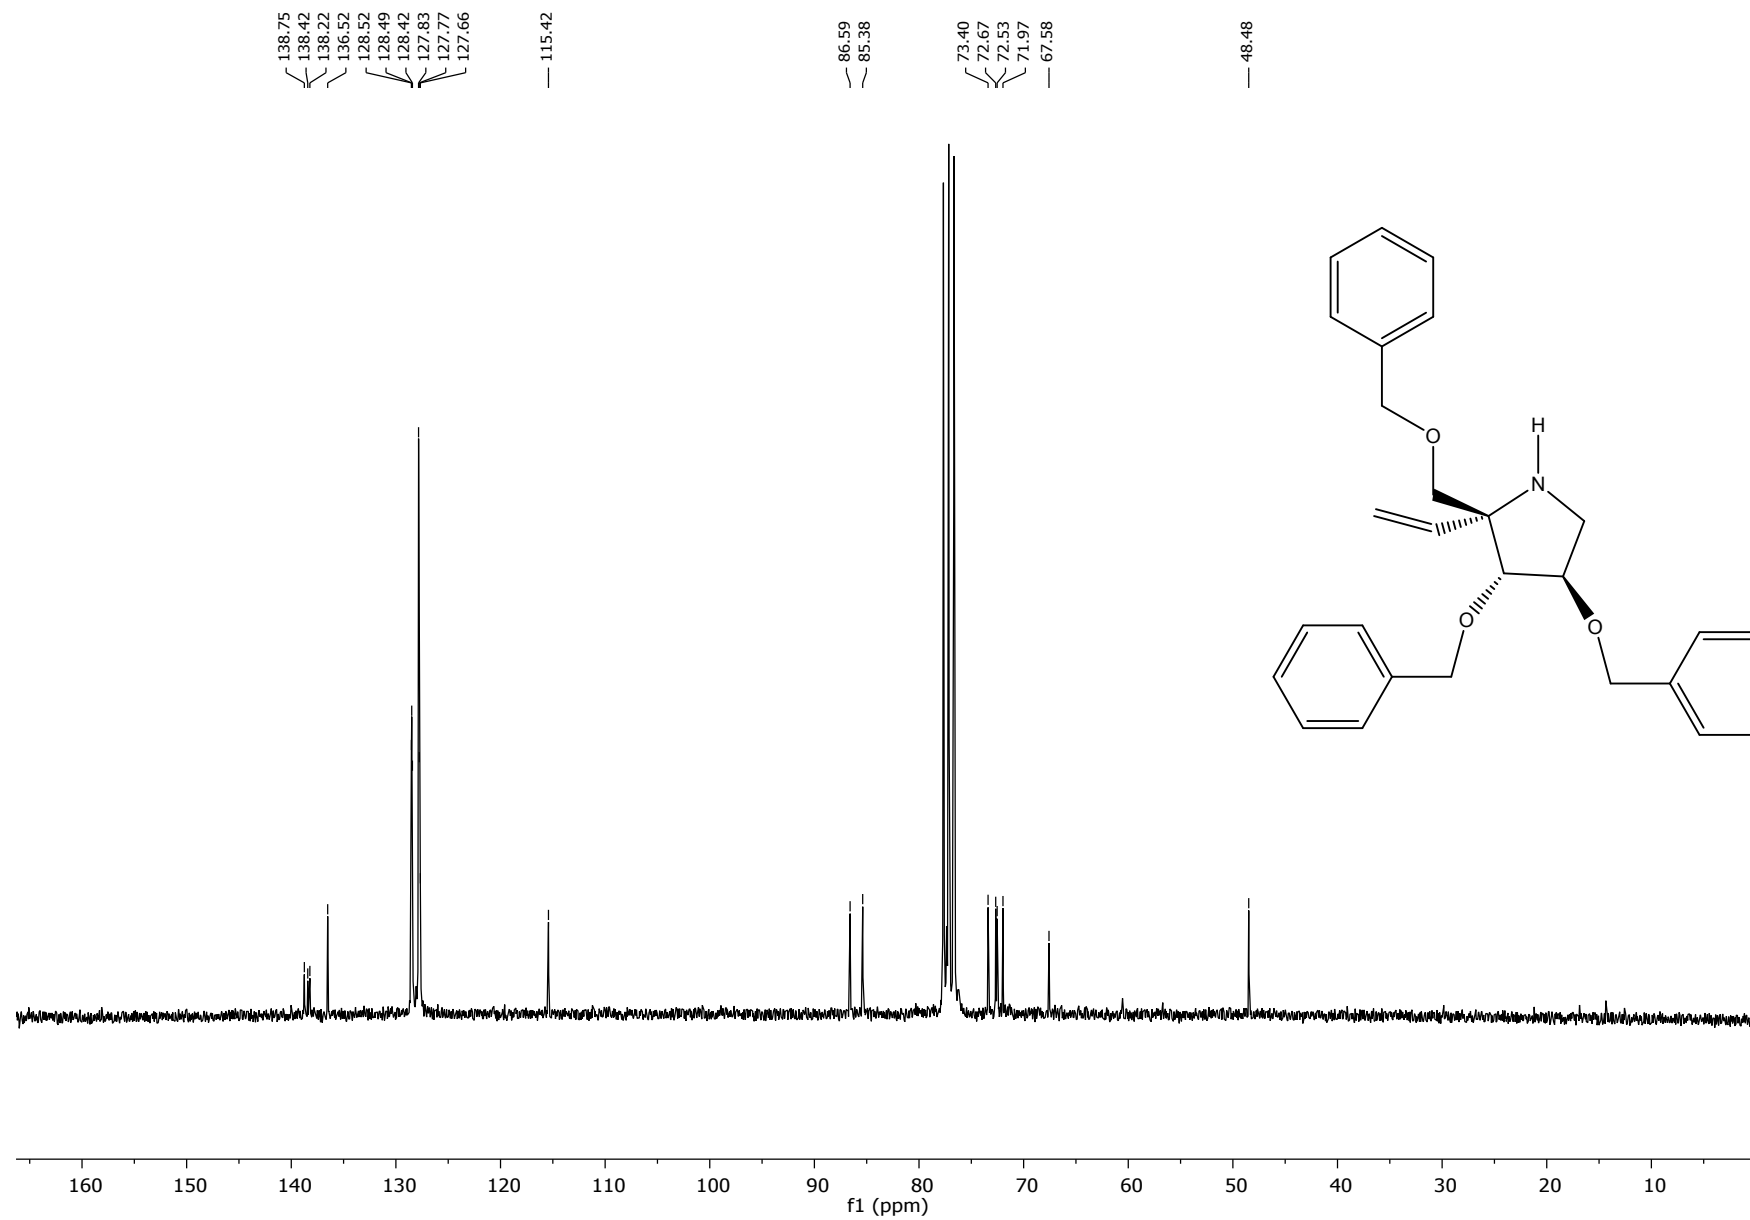

<sup>1</sup>H-NMR spectrum of 20b (CDCl<sub>3</sub>)

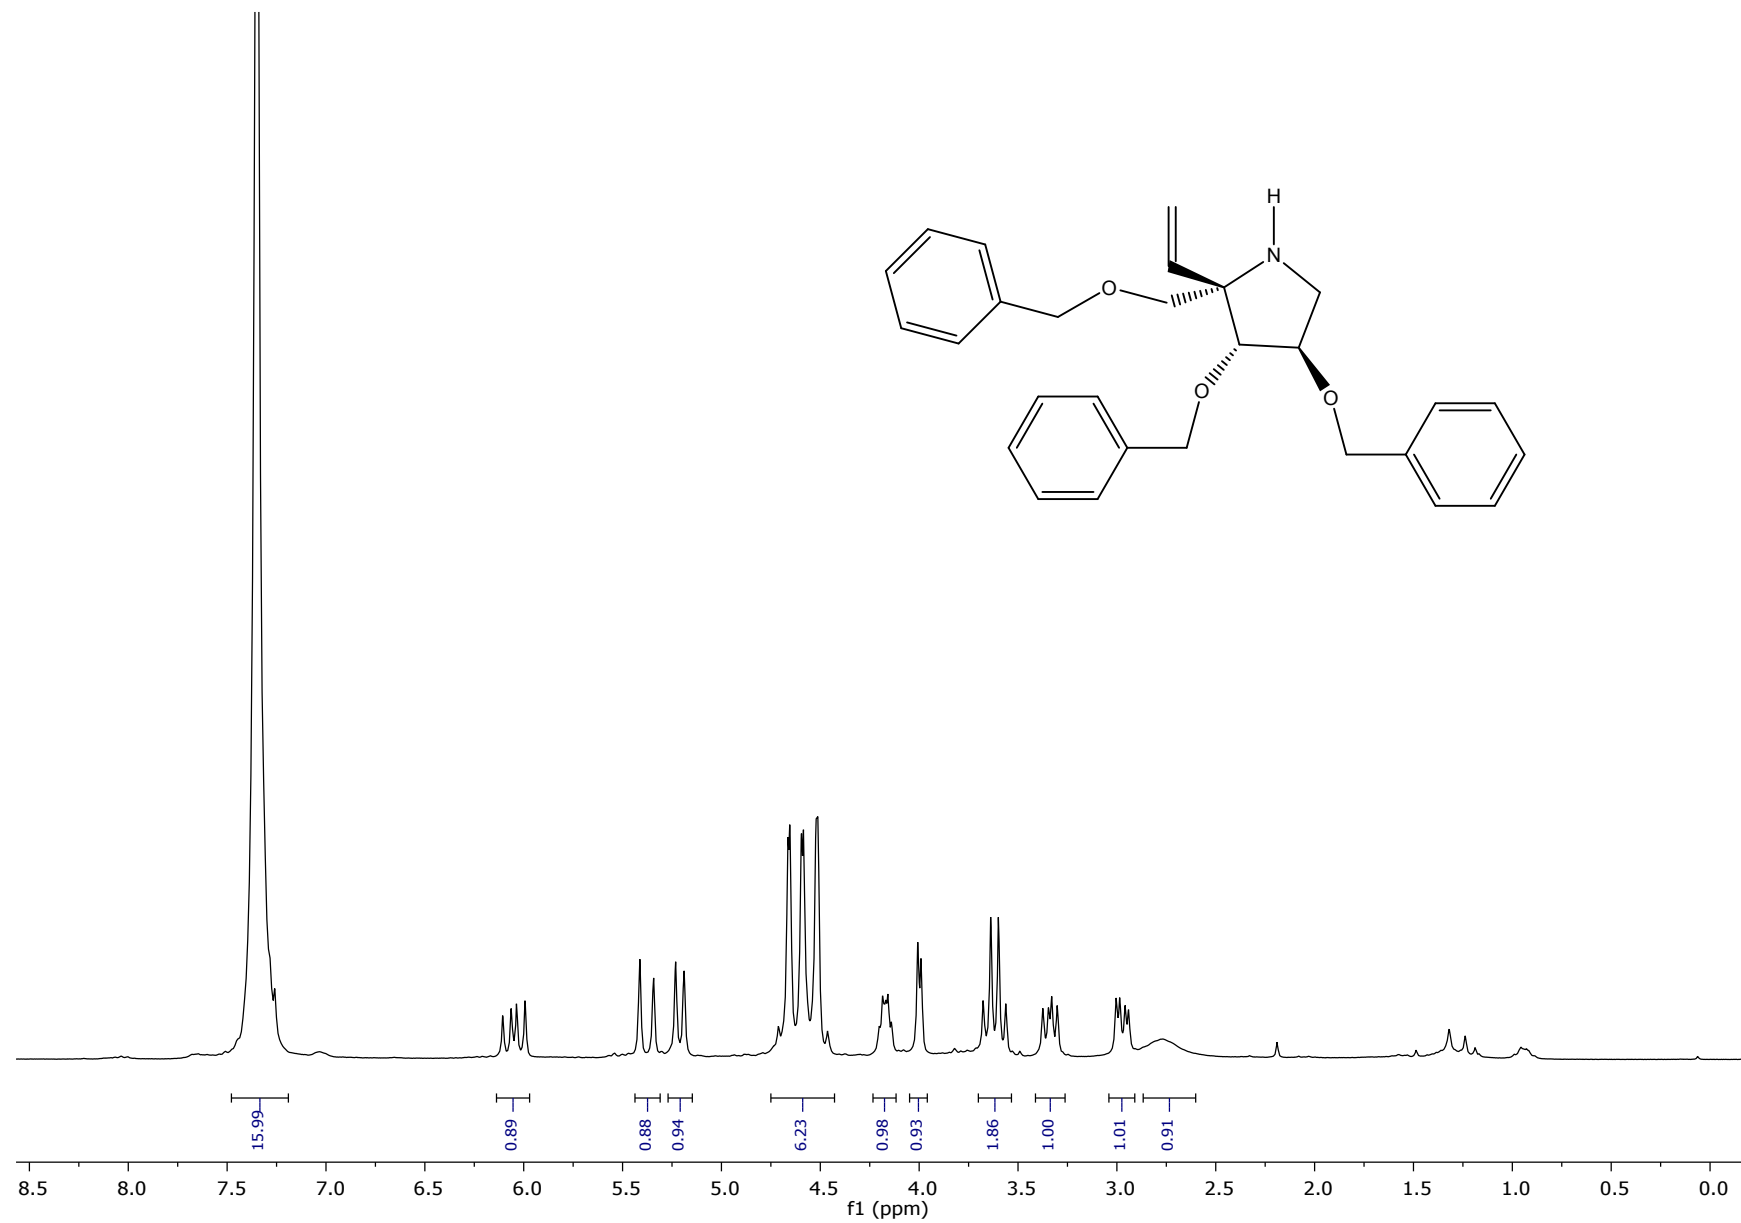

<sup>13</sup>C-NMR spectrum of 20b (CDCl<sub>3</sub>)

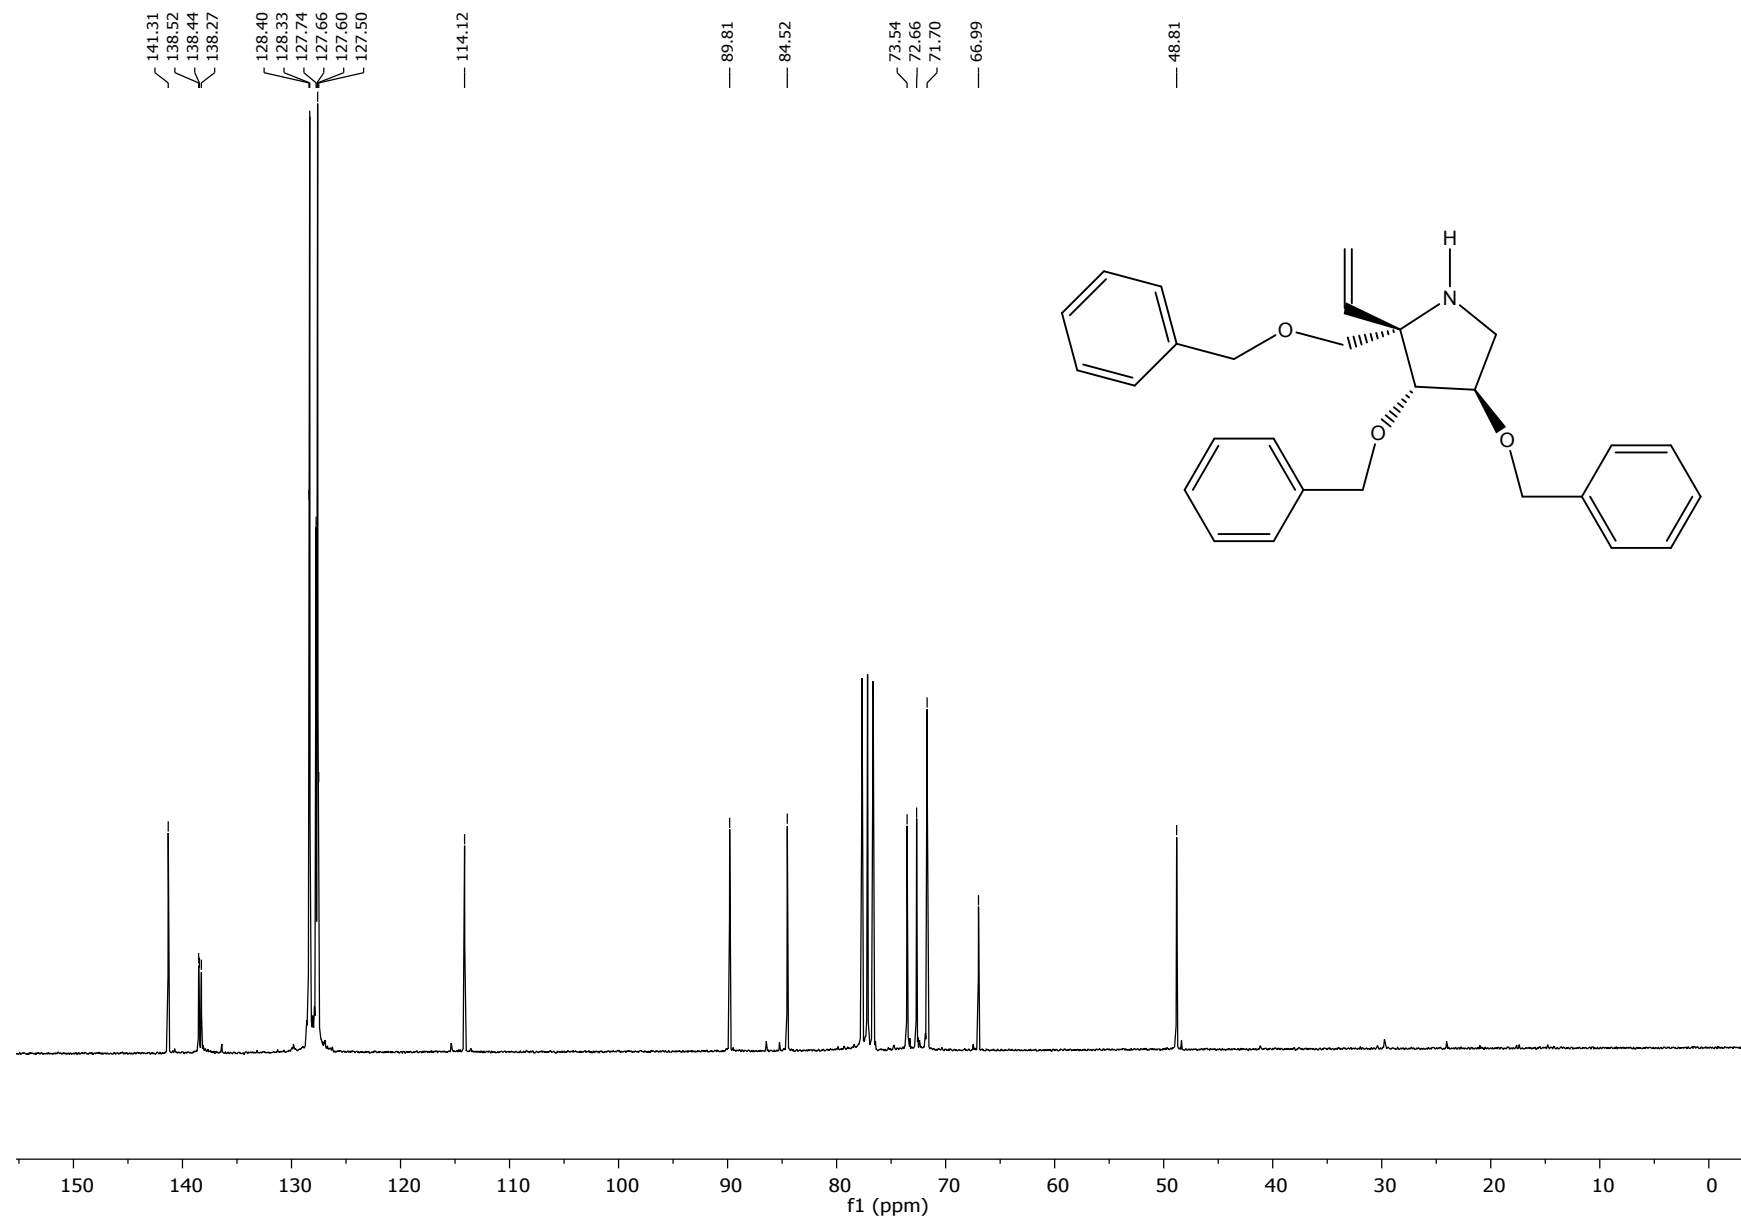

1H-NMR spectrum of 21a and 21b (CDCl<sub>3</sub>)

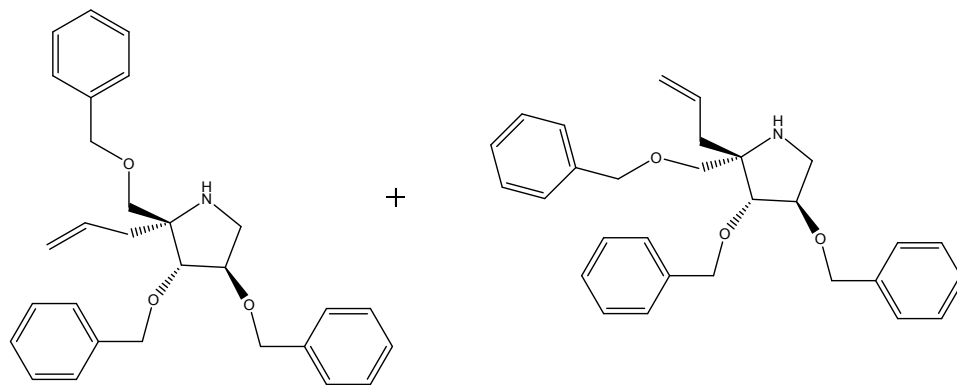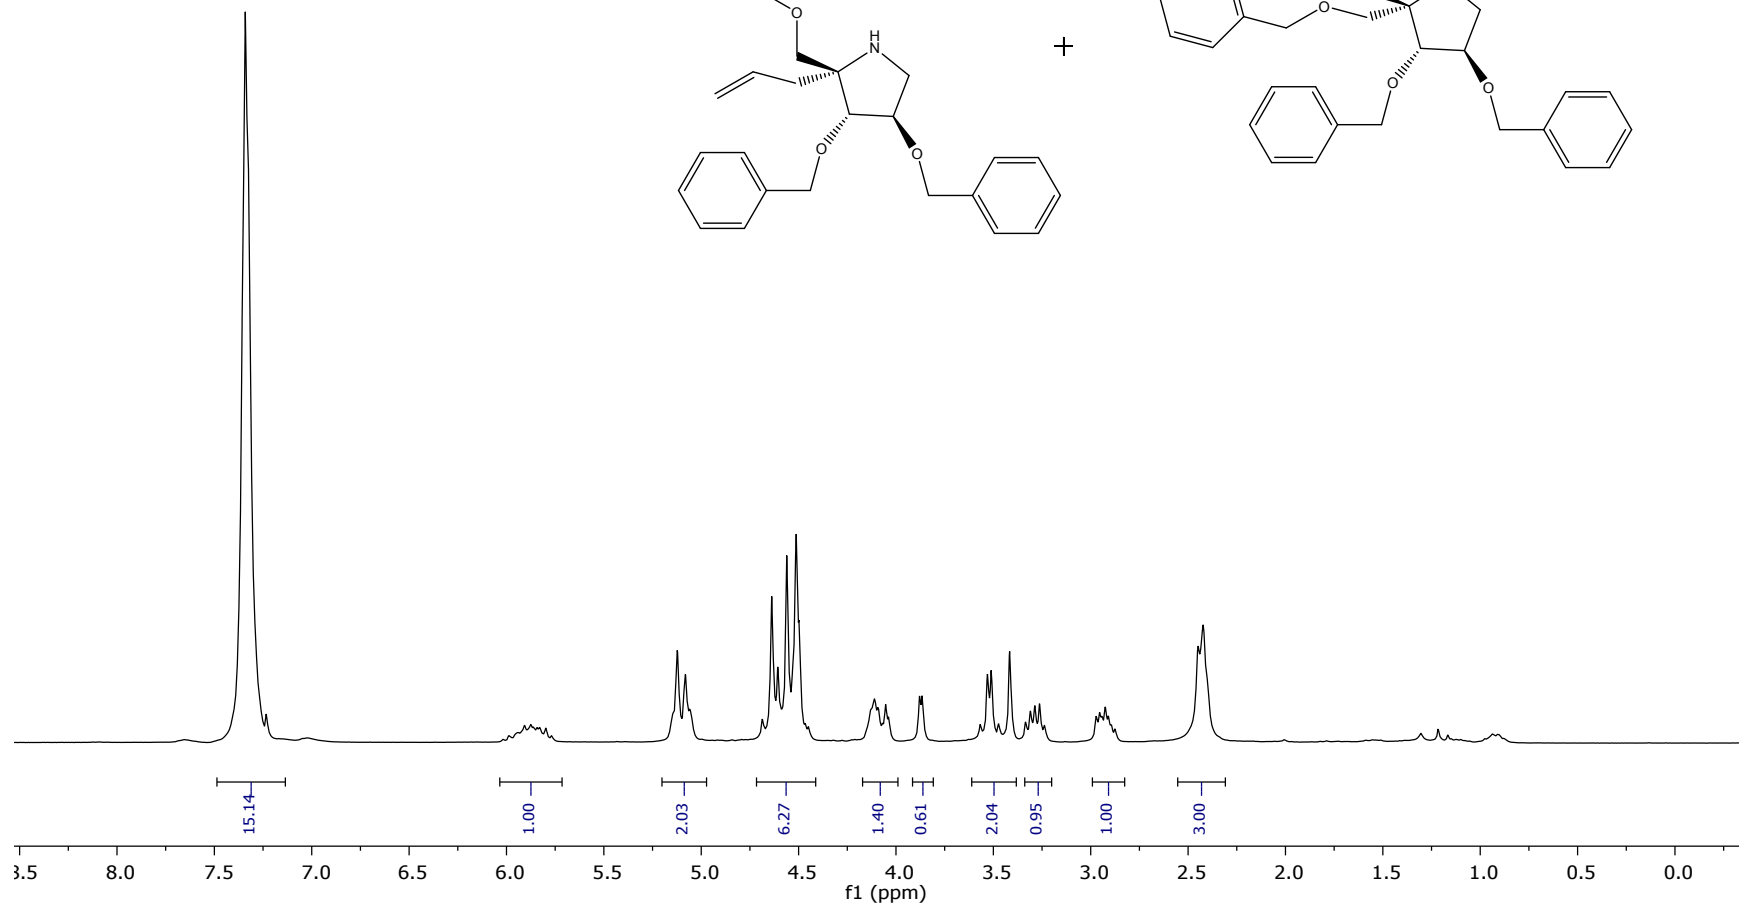

JMOD <sup>13</sup>C-NMR spectrum of 21a and 21b (CDCl<sub>3</sub>)

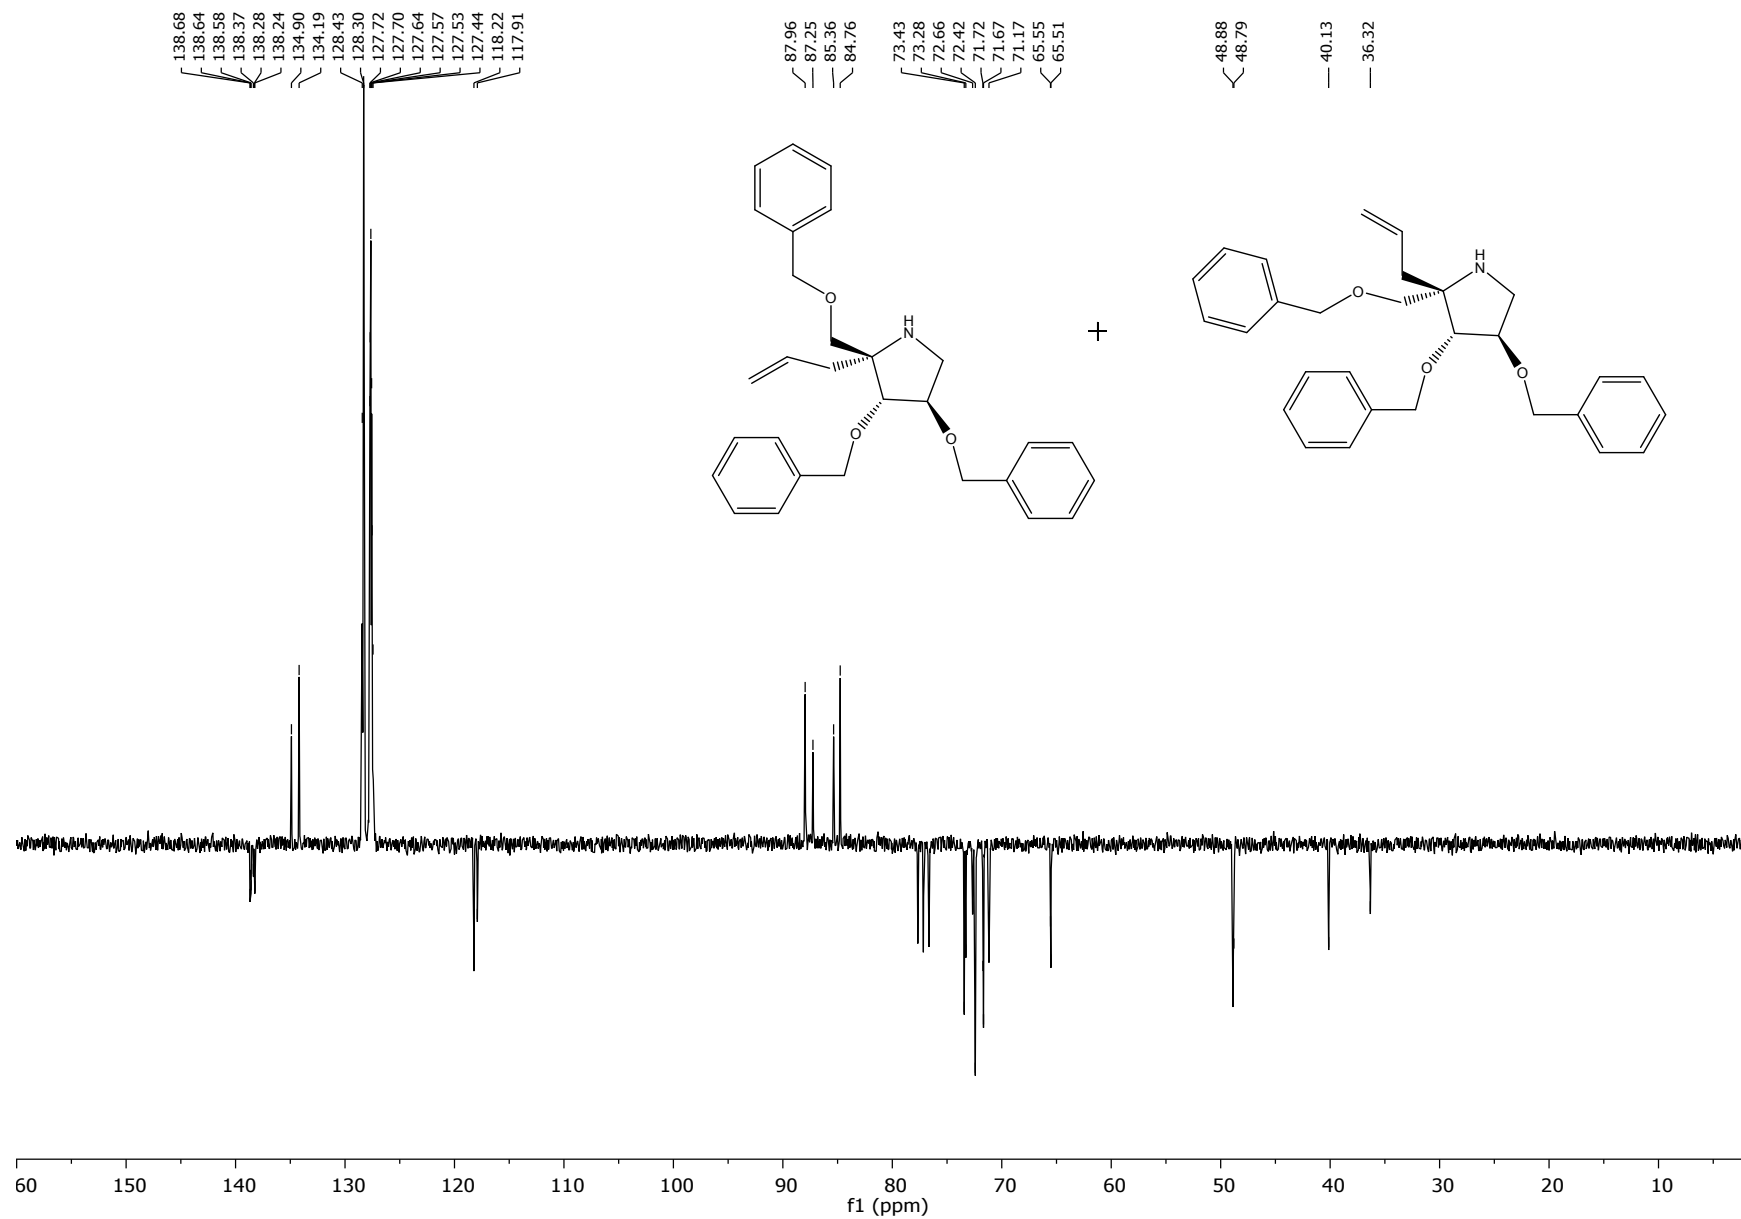



<sup>1</sup>H-NMR spectrum of 21b (CDCl<sub>3</sub>)

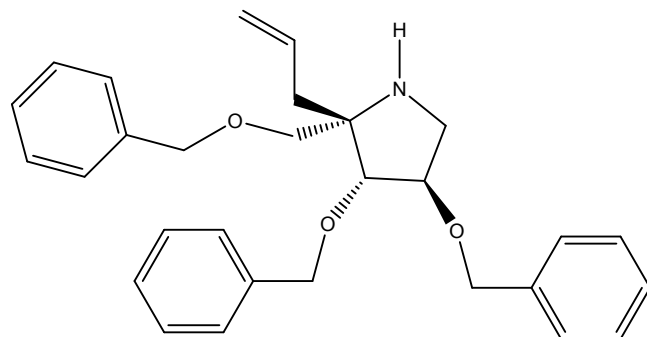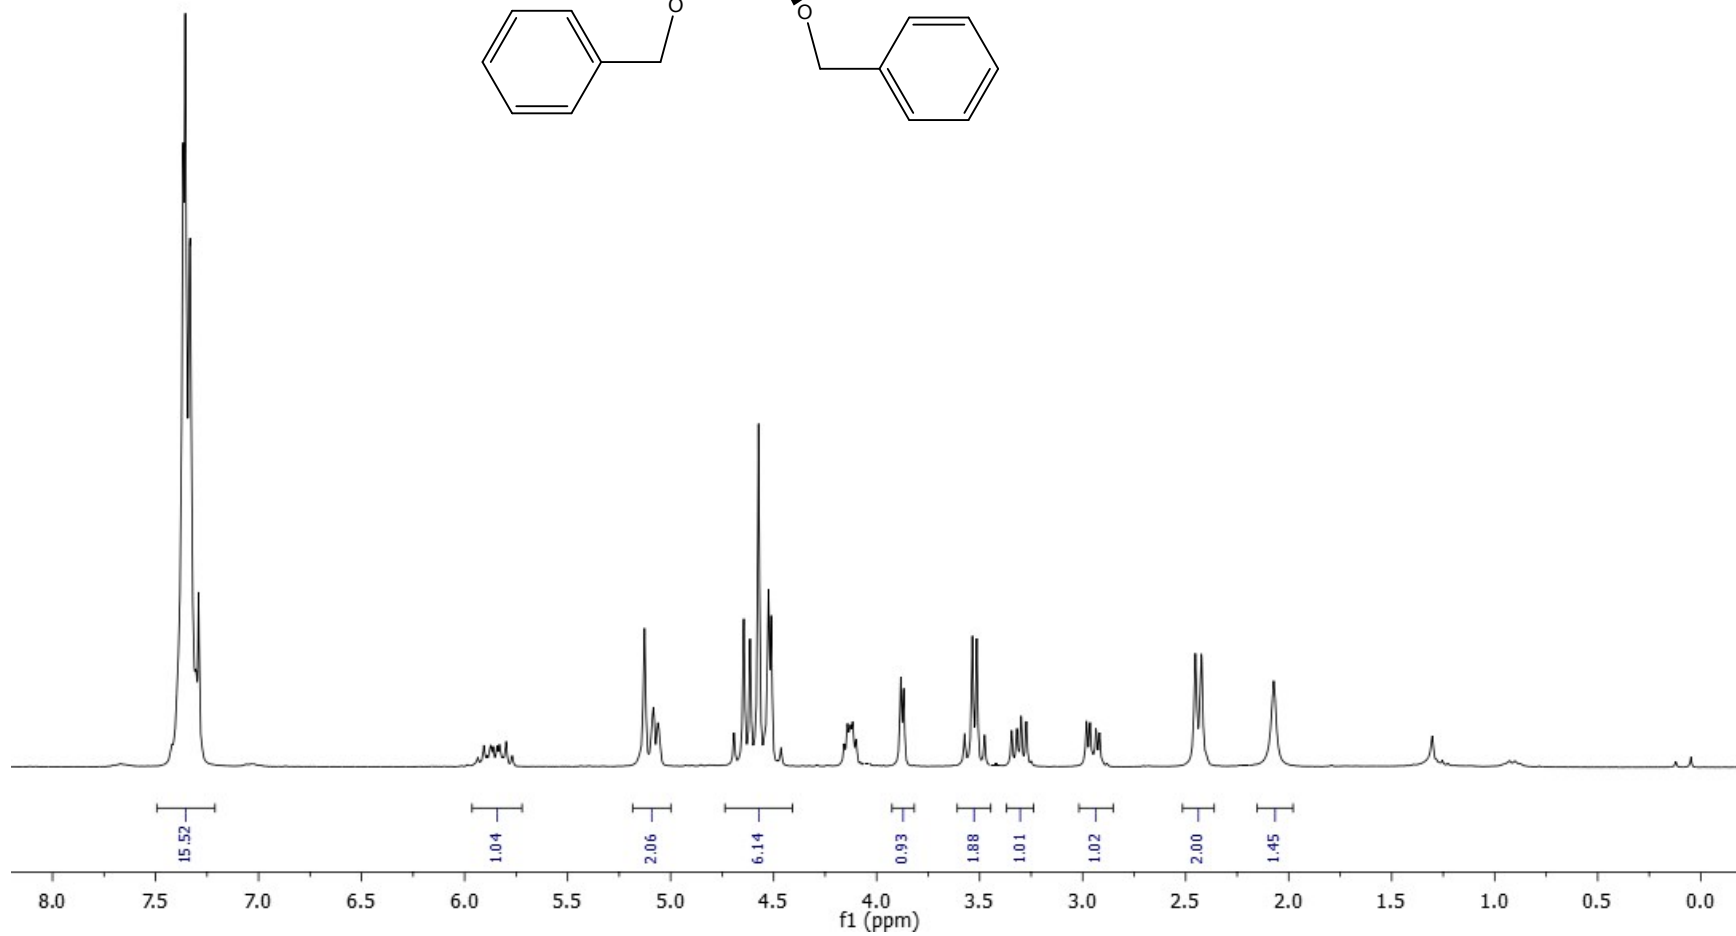

<sup>13</sup>C-NMR spectrum of 21b (CDCl<sub>3</sub>)

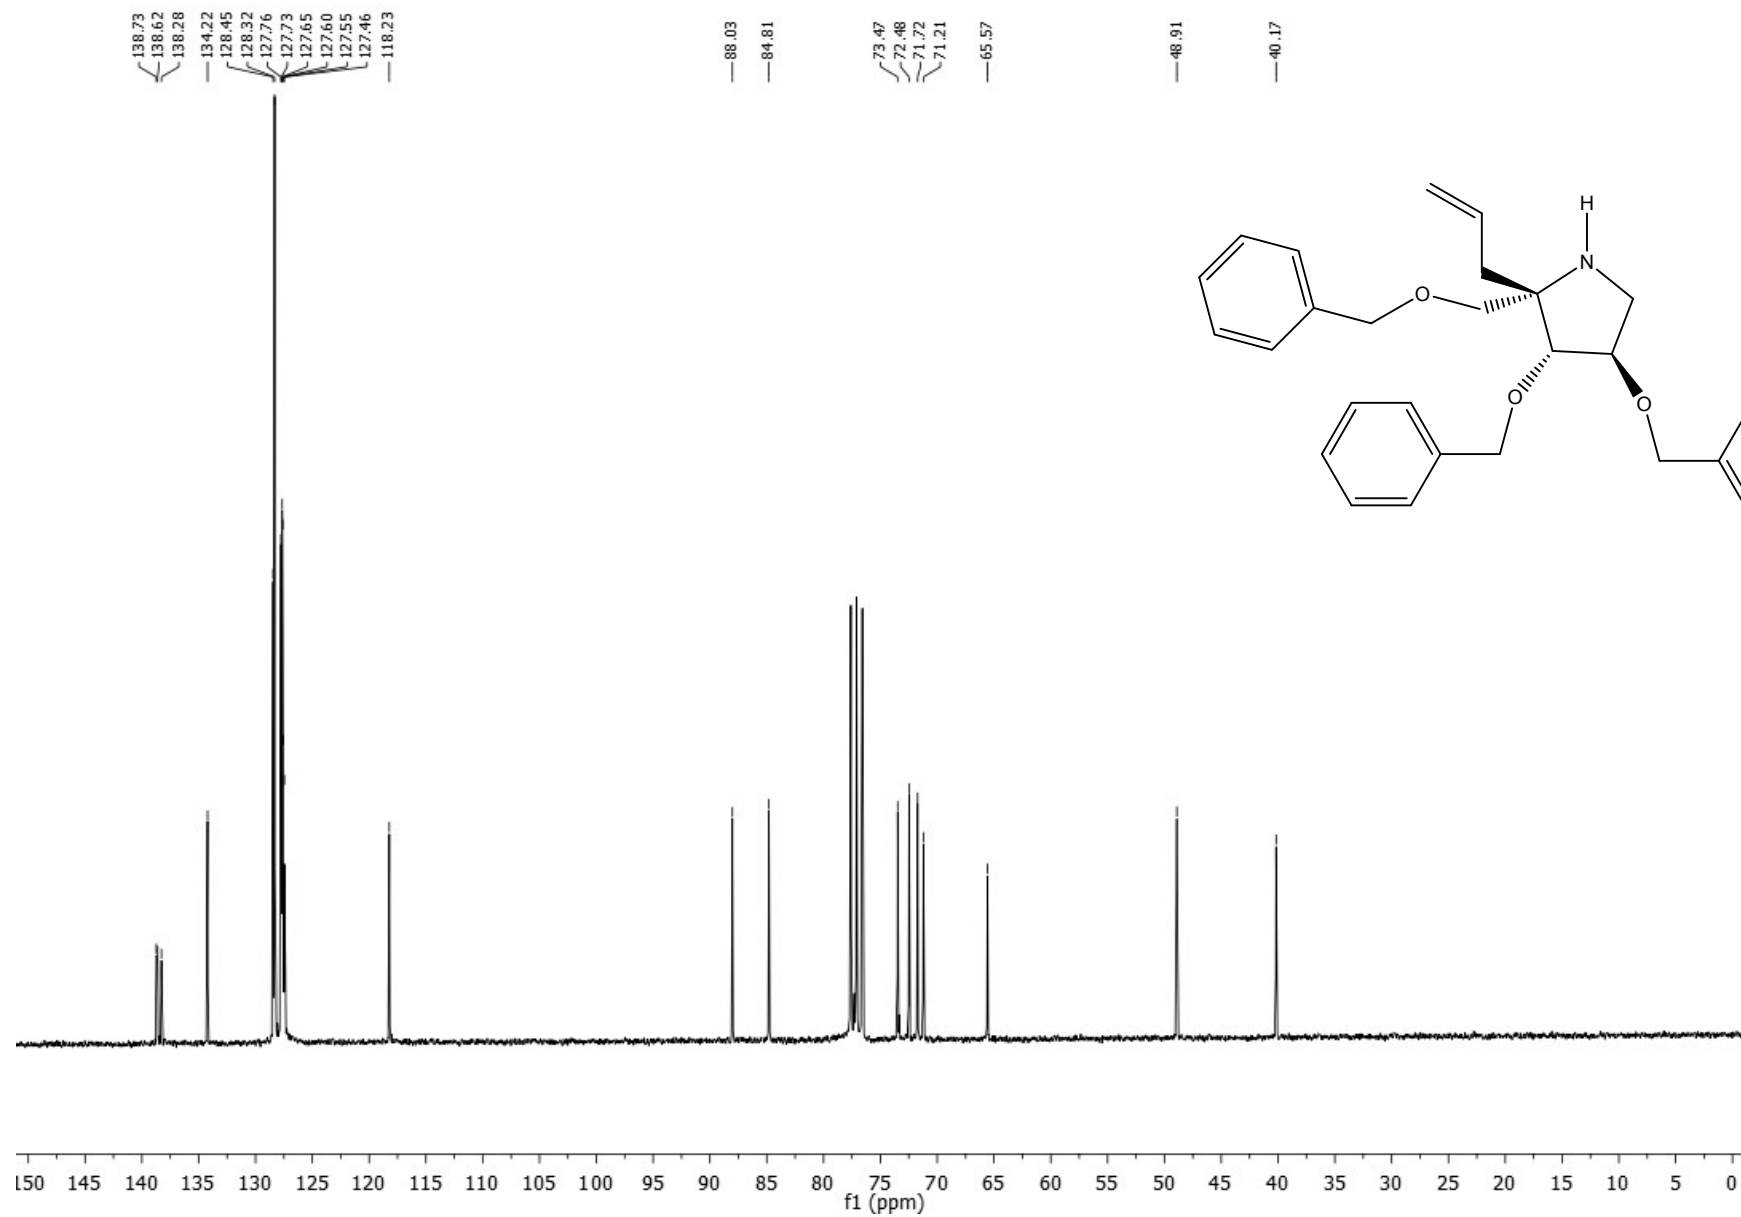

<sup>1</sup>H-NMR spectrum of 22a (CDCl<sub>3</sub>)

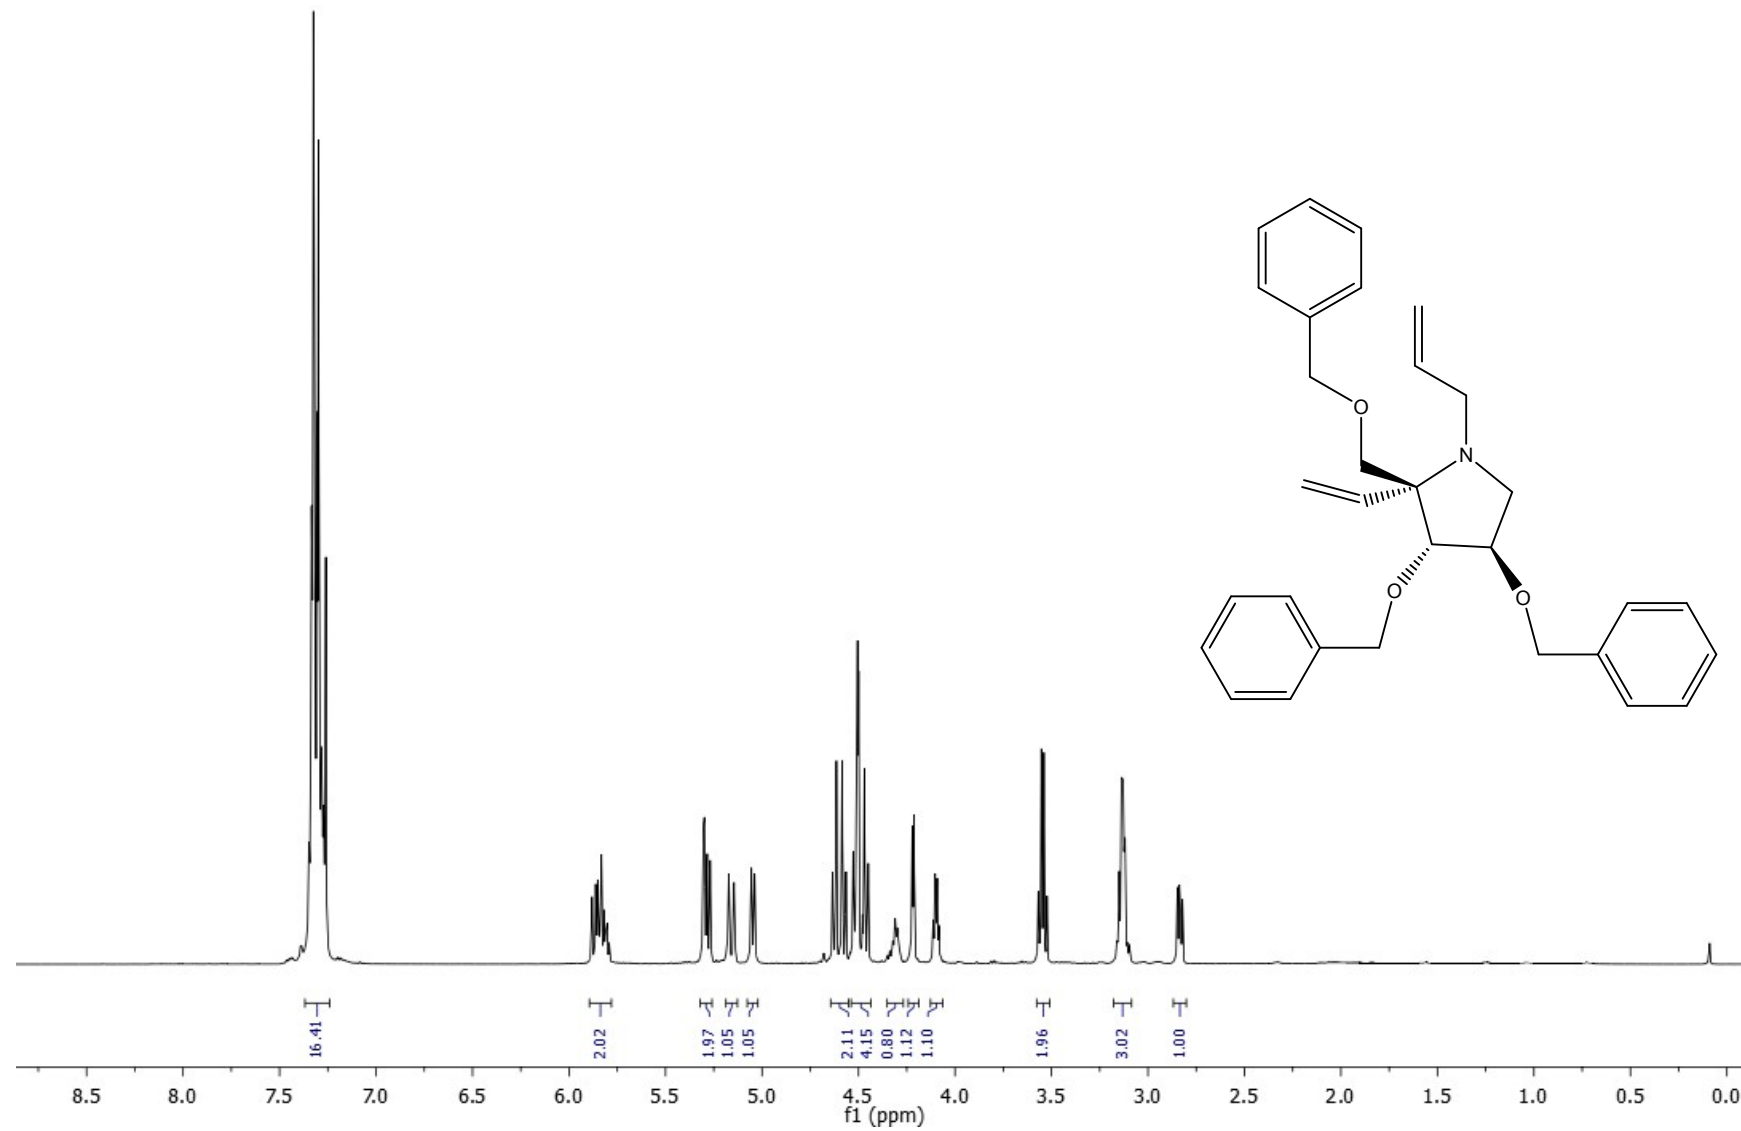

<sup>13</sup>C-NMR spectrum of 22a (CDCl<sub>3</sub>)

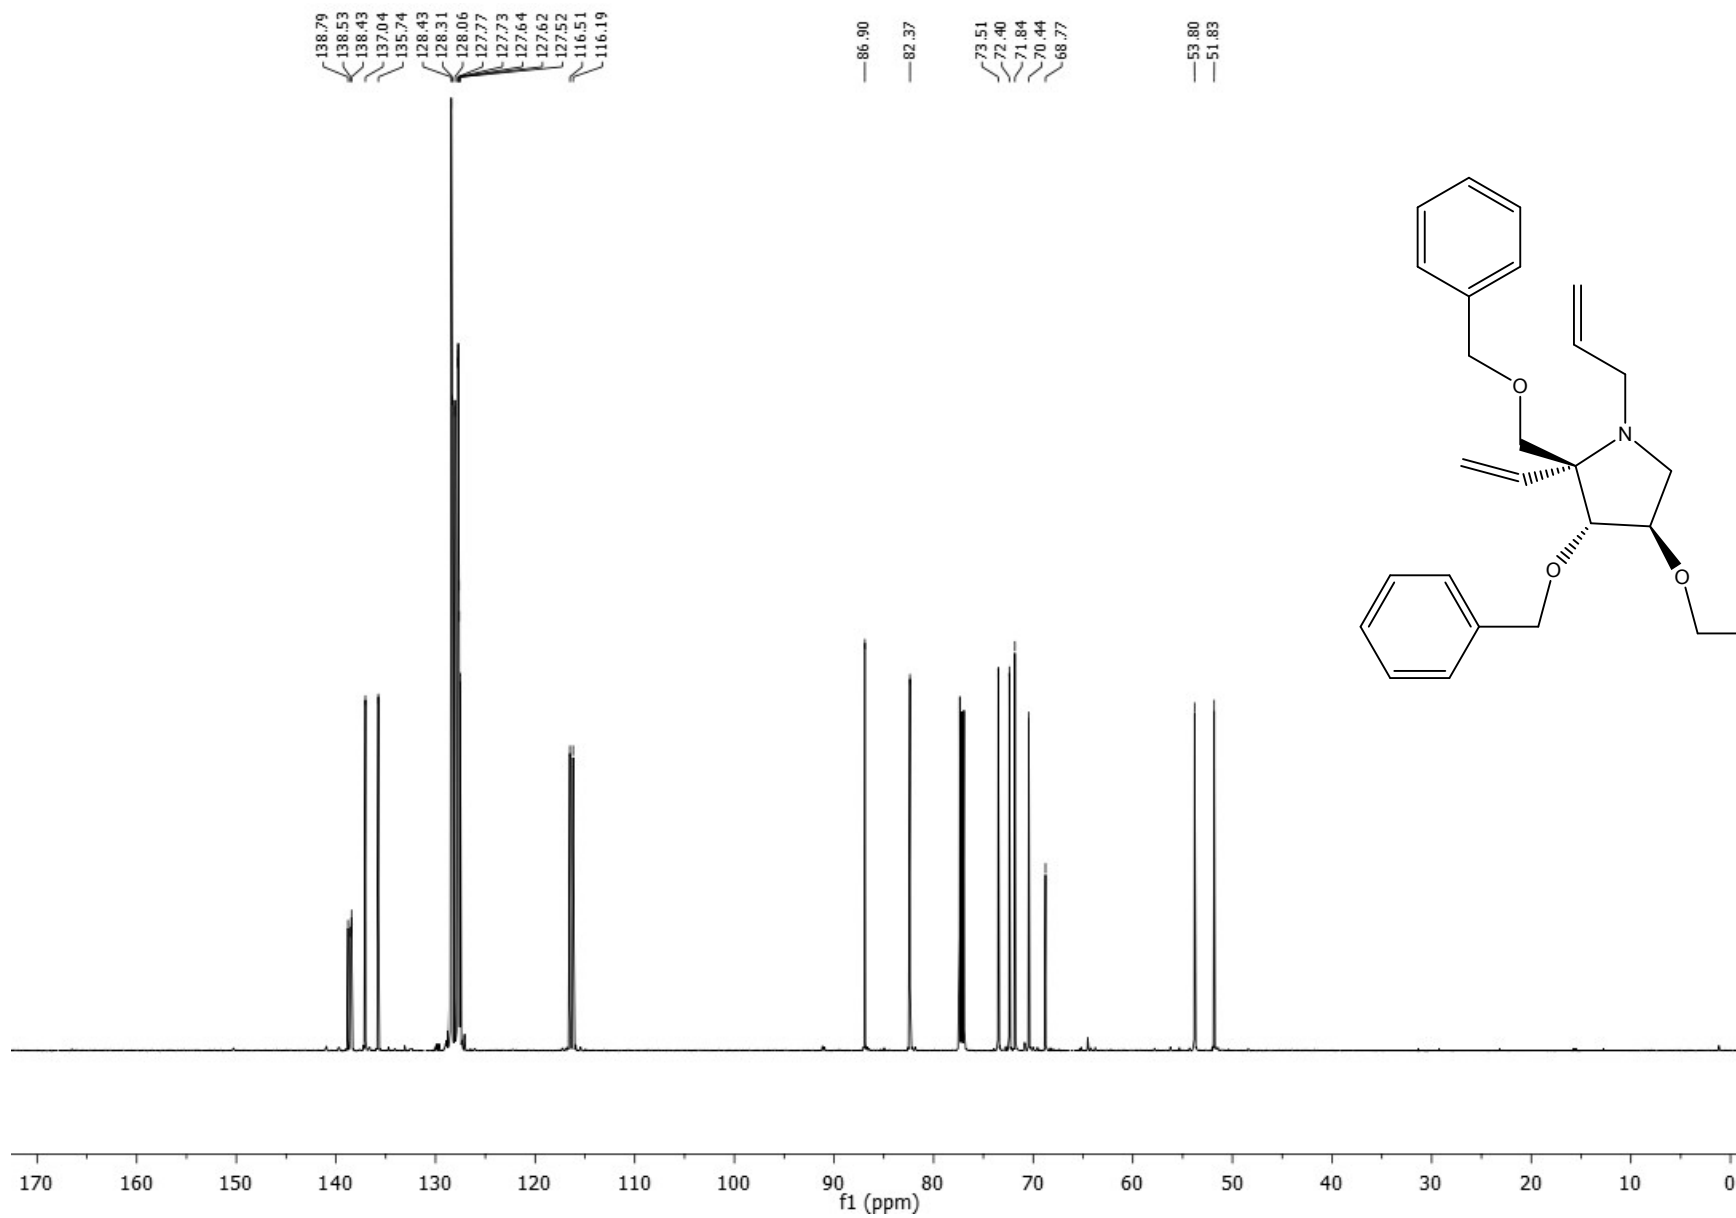

<sup>1</sup>H-NMR spectrum of 22b (CDCl<sub>3</sub>)

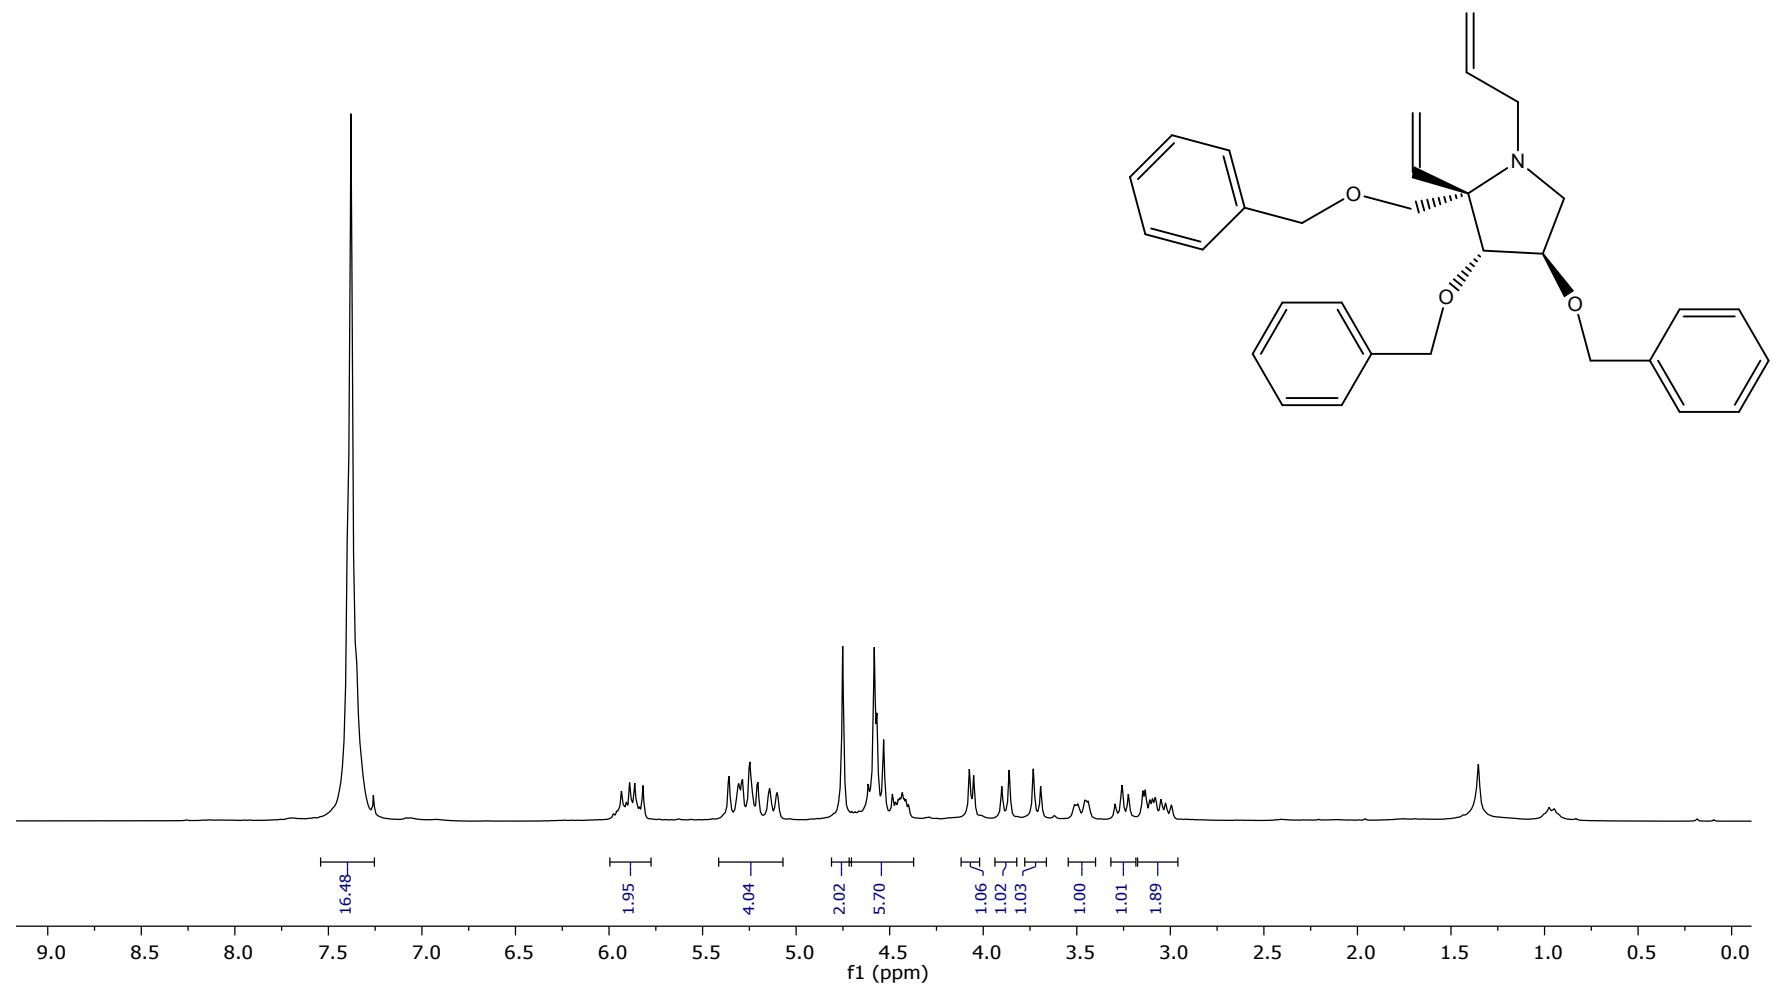

<sup>13</sup>C-NMR spectrum of 22b (CDCl<sub>3</sub>)

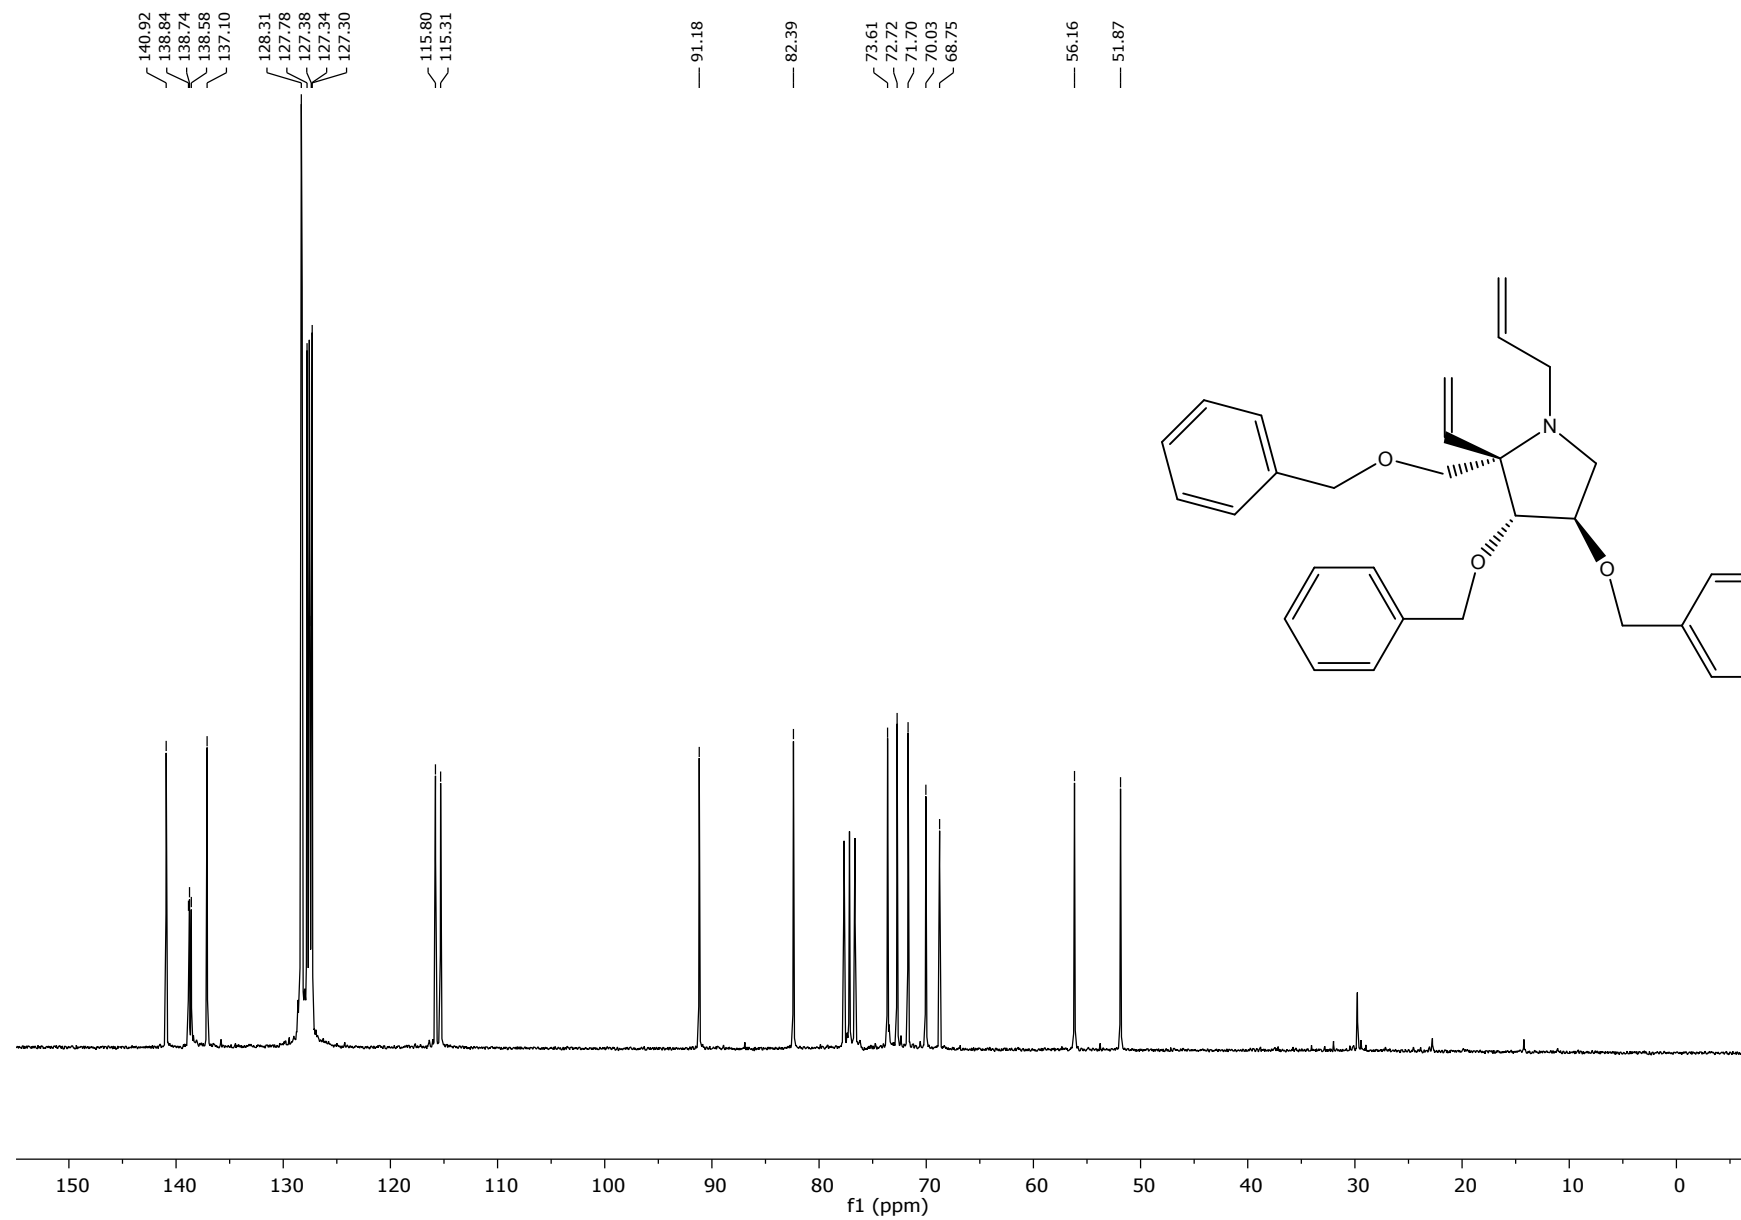

<sup>1</sup>H-NMR spectrum of 23a (CDCl<sub>3</sub>)

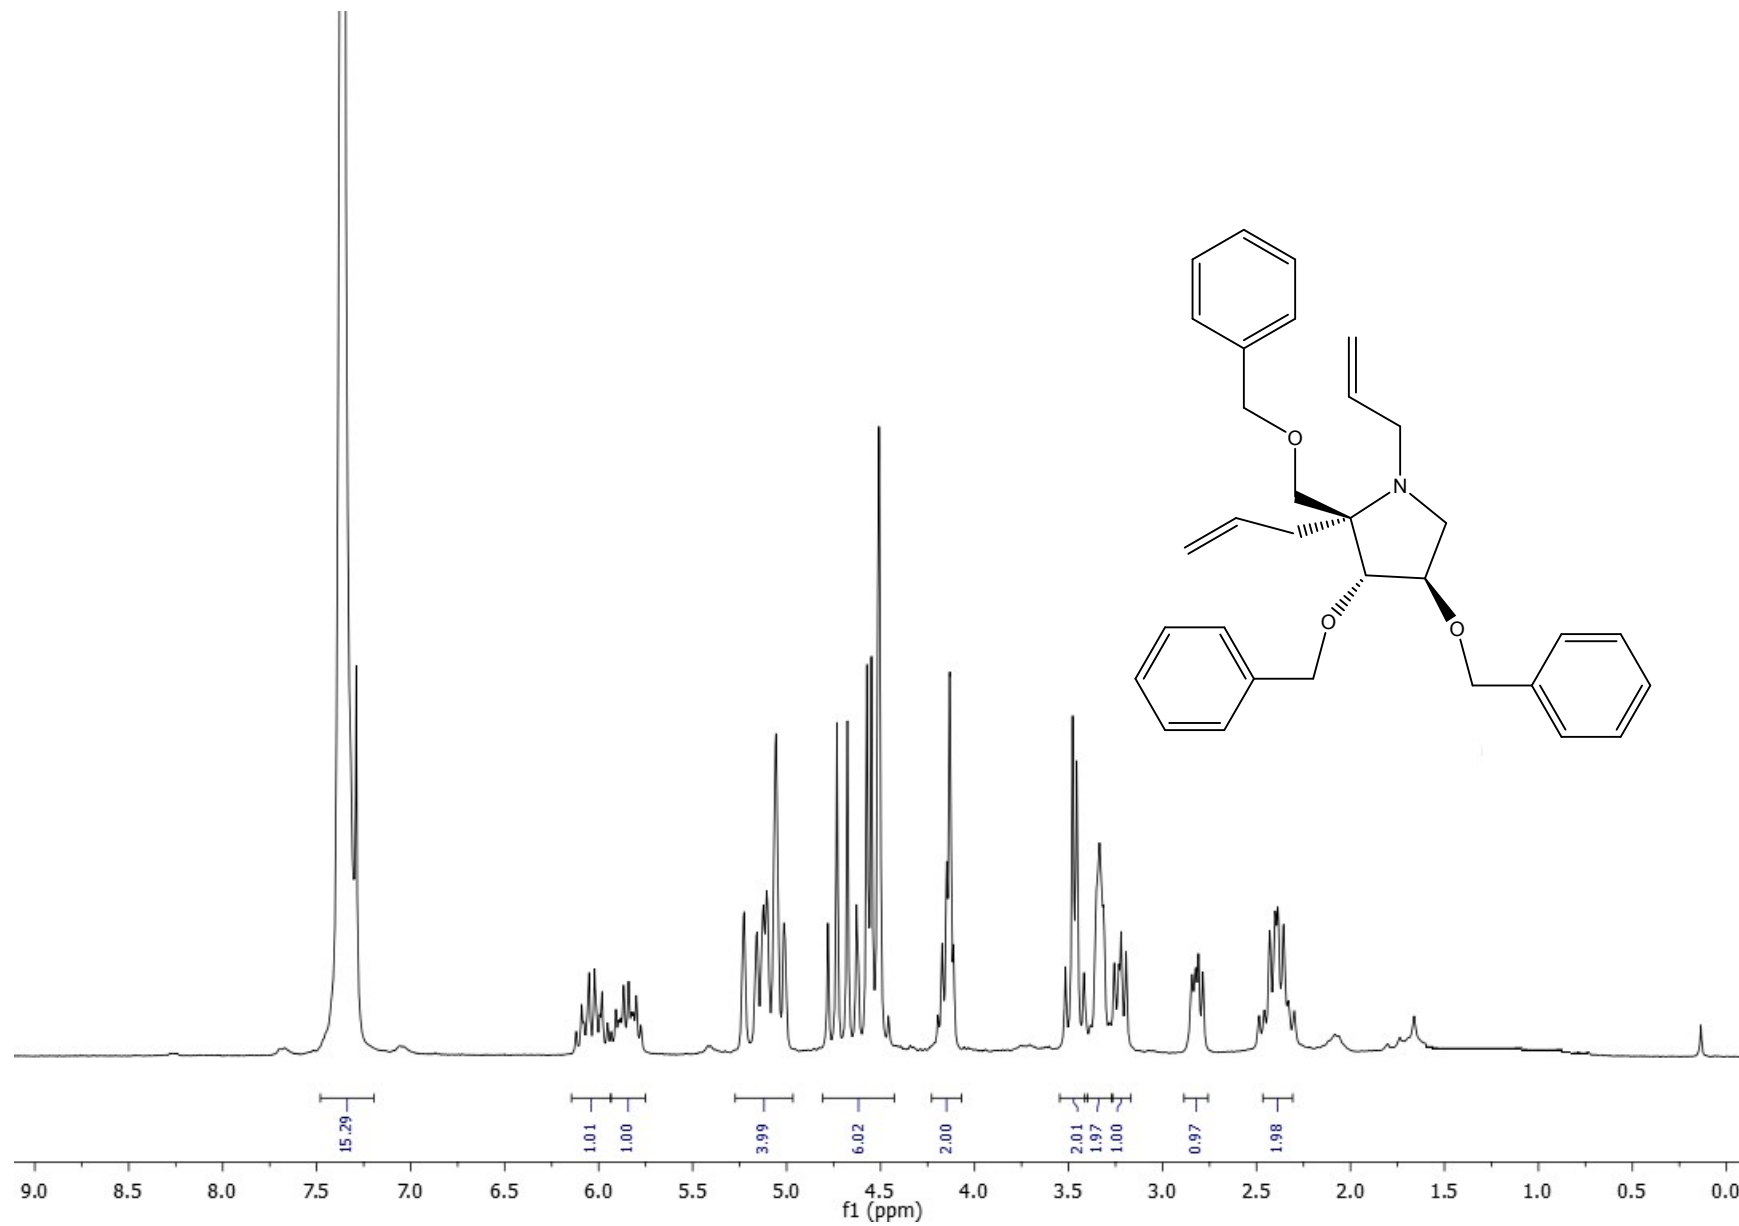

<sup>13</sup>C-NMR spectrum of 23a (CDCl<sub>3</sub>)

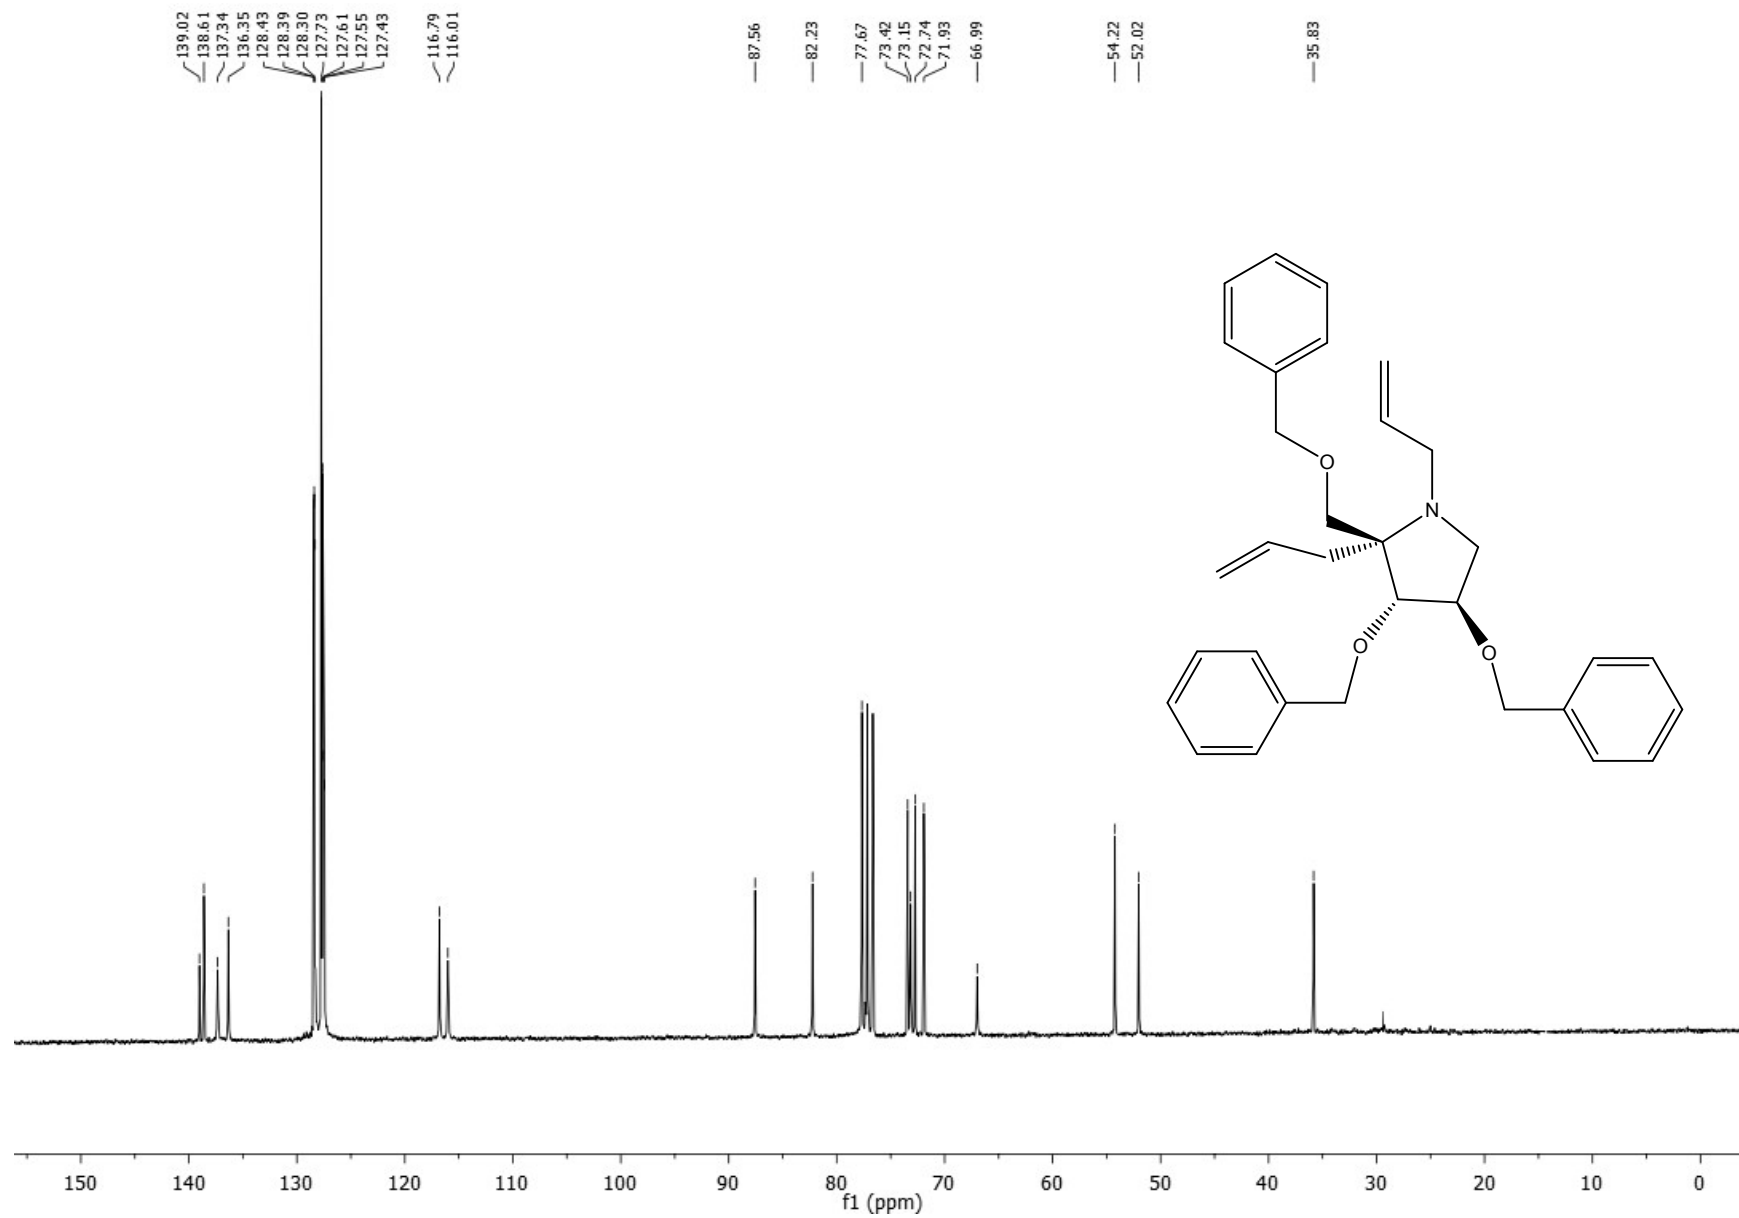



<sup>1</sup>H-NMR spectrum of 23b (CDCl<sub>3</sub>)

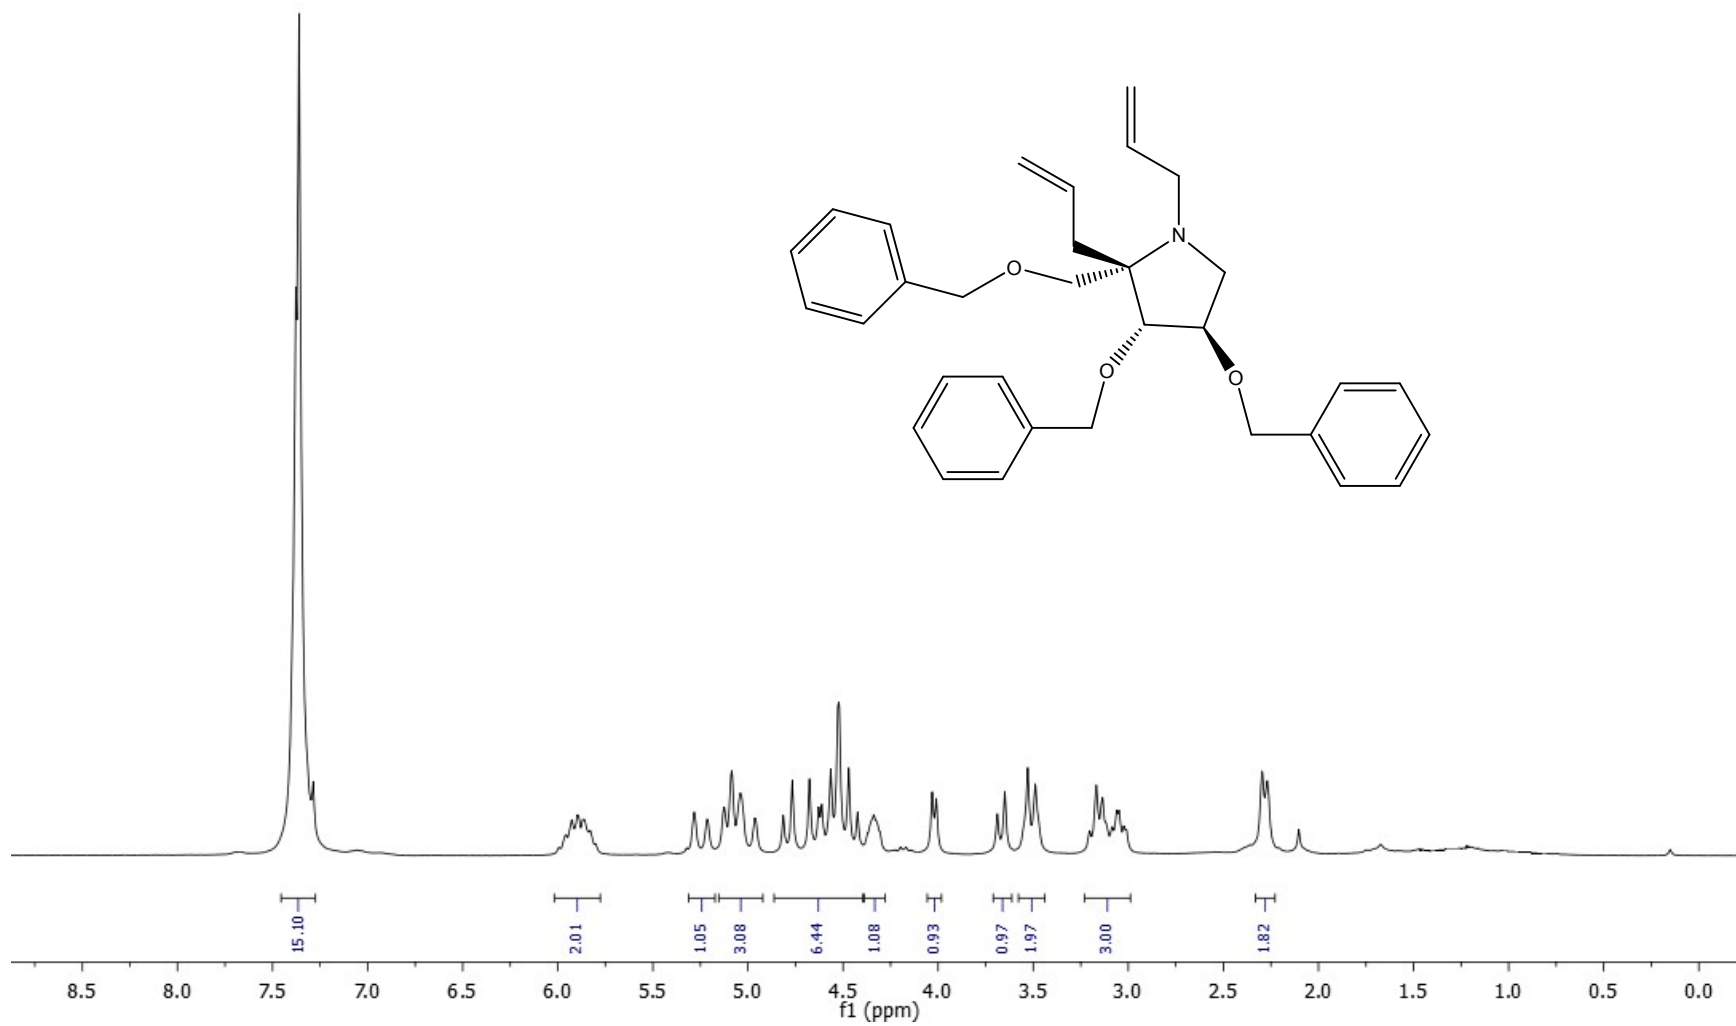

<sup>13</sup>C-NMR spectrum of 23b (CDCl<sub>3</sub>)

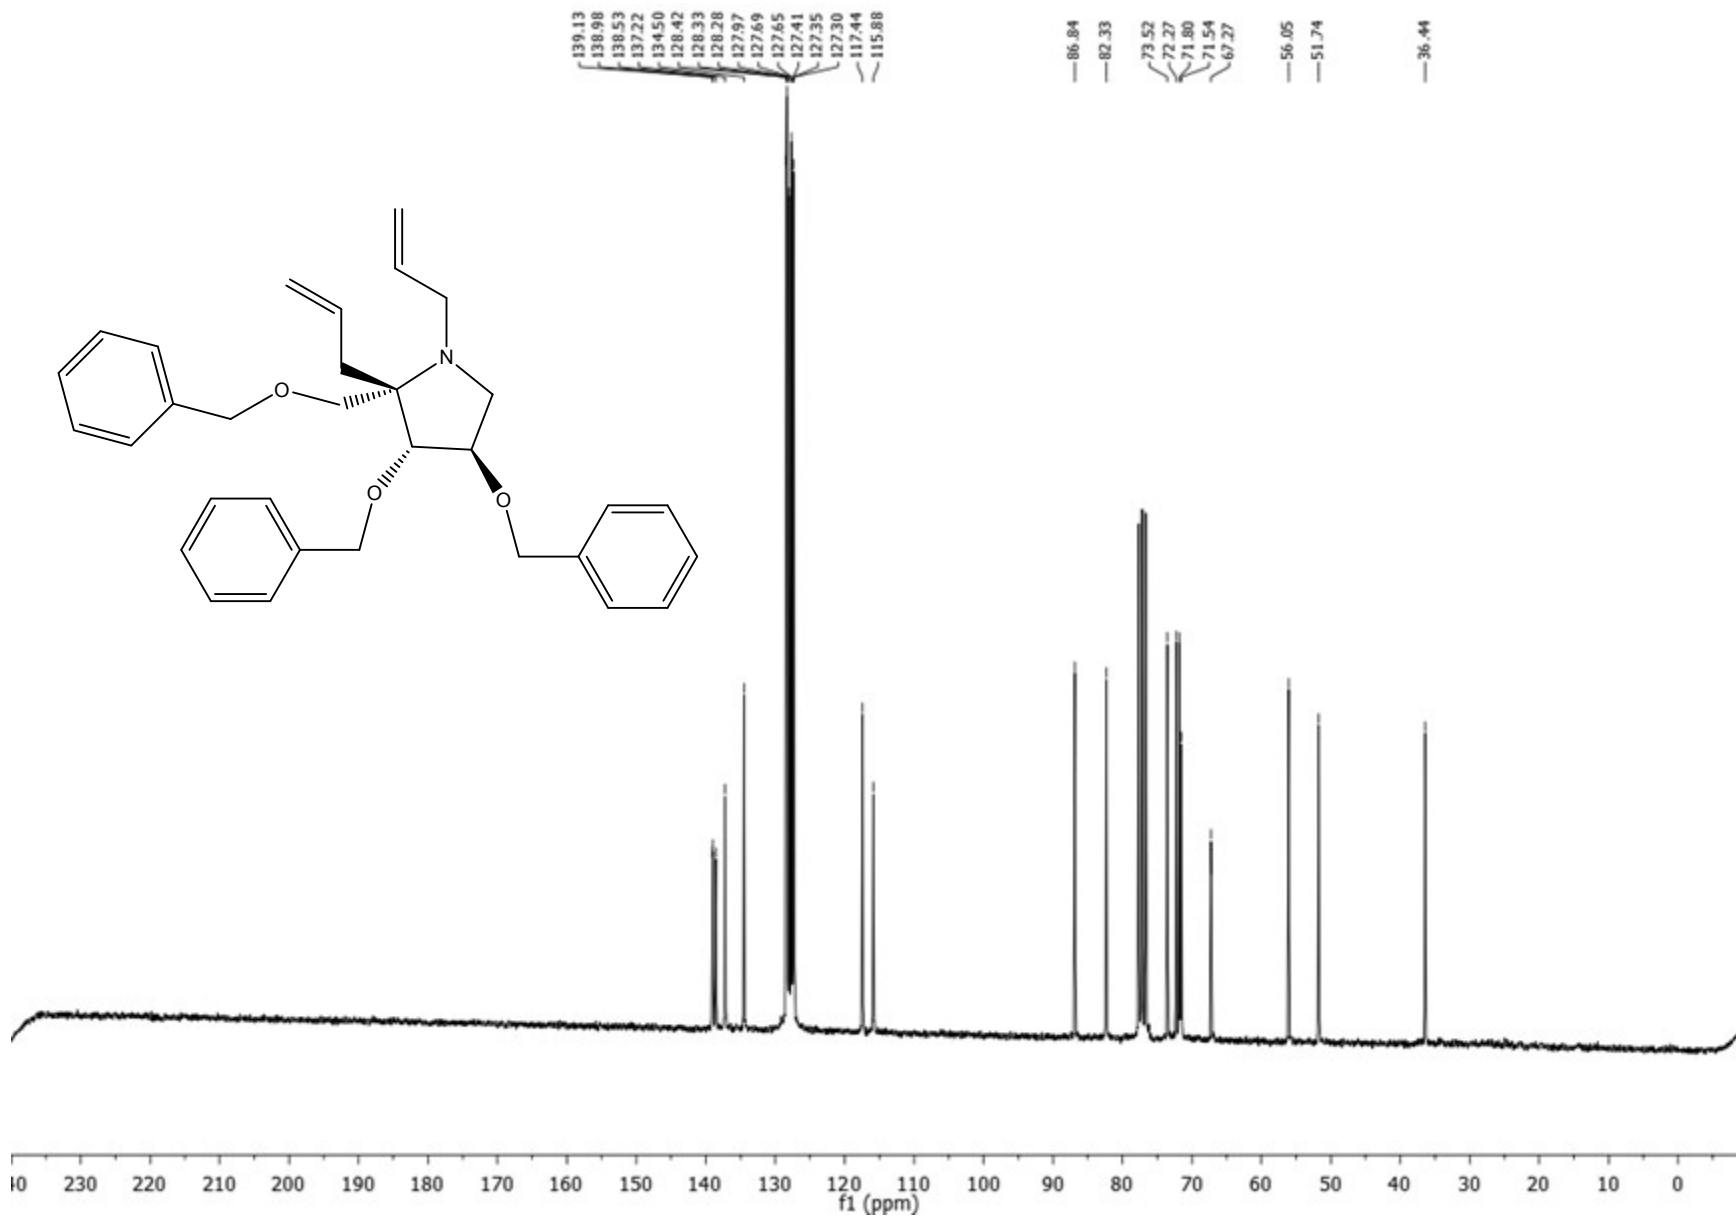

<sup>1</sup>H-NMR spectrum of 24a (CDCl<sub>3</sub>)

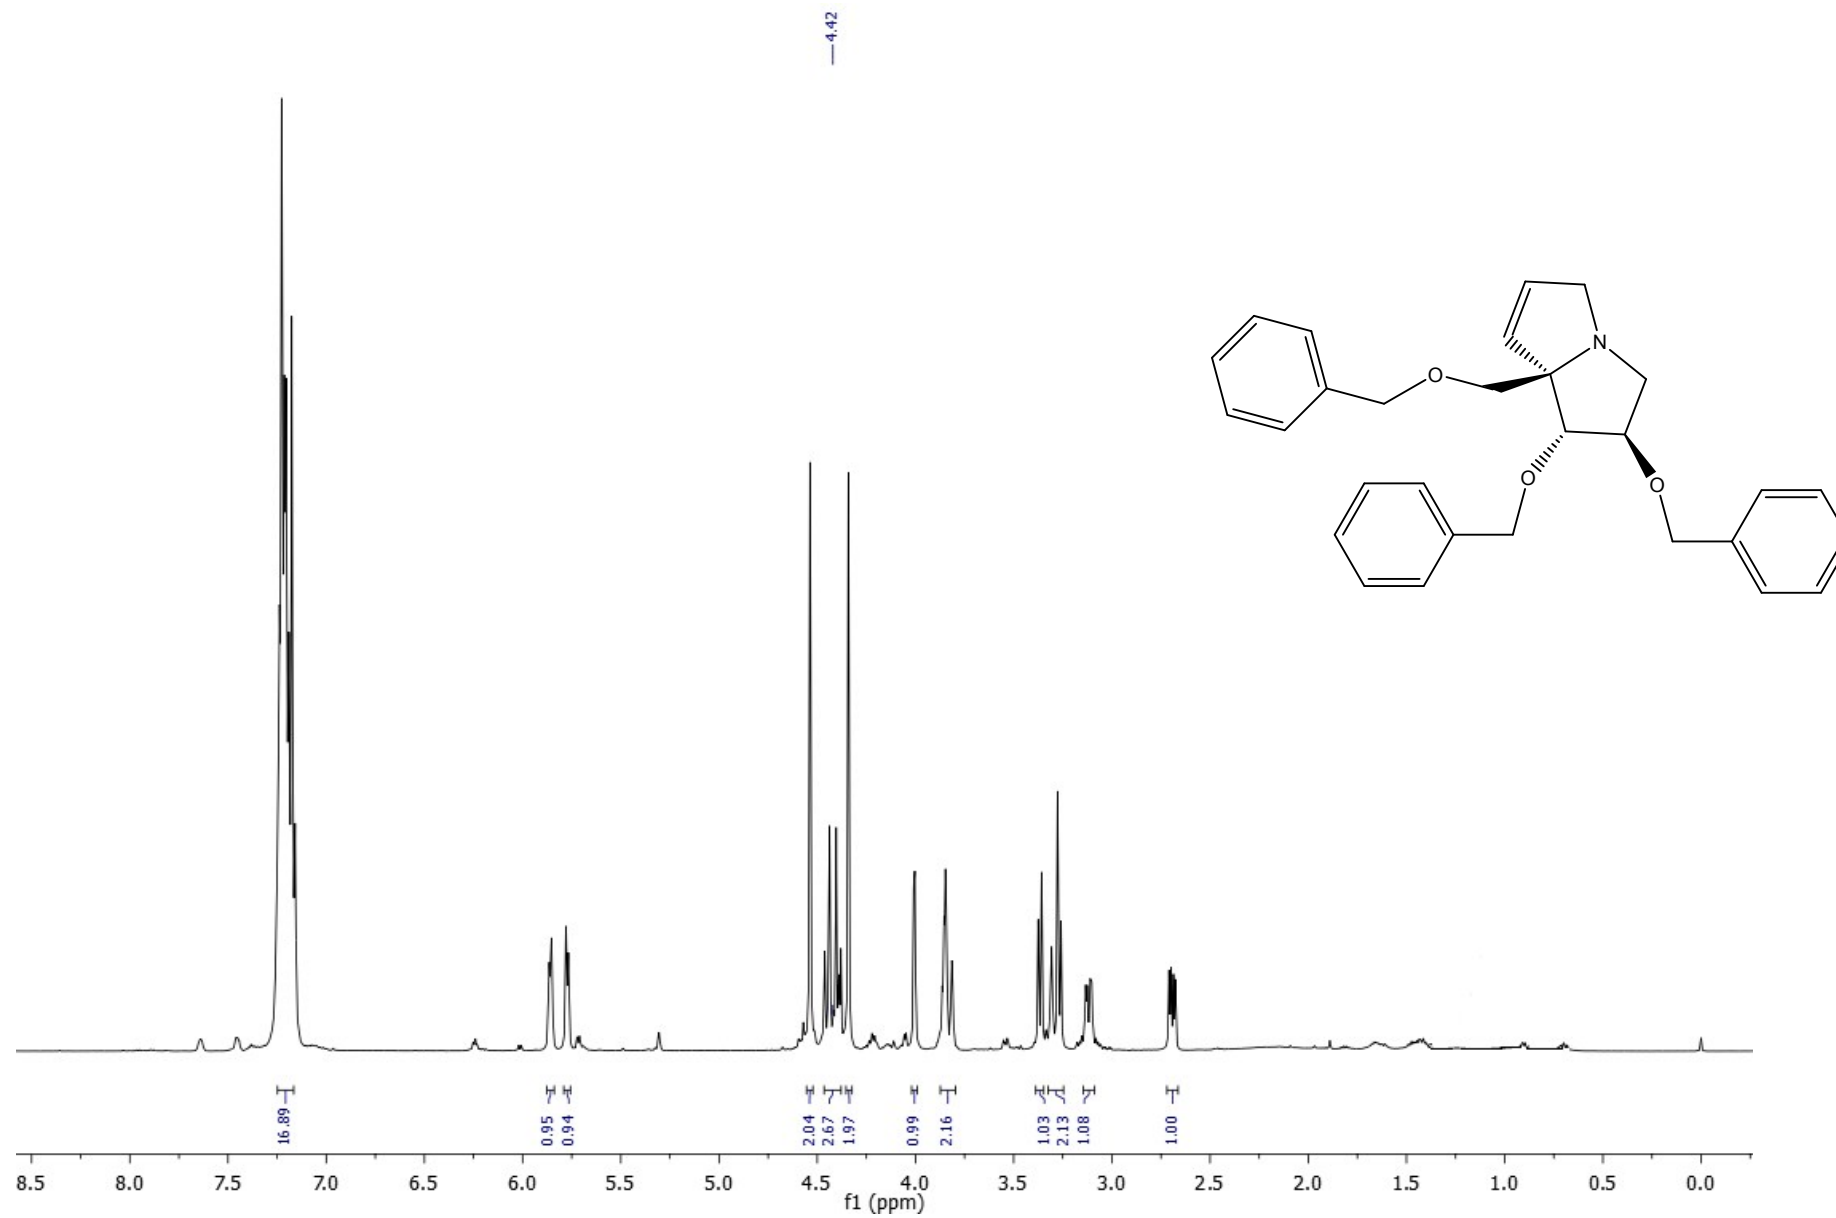

<sup>13</sup>C-NMR spectrum of 24a (CDCl<sub>3</sub>)

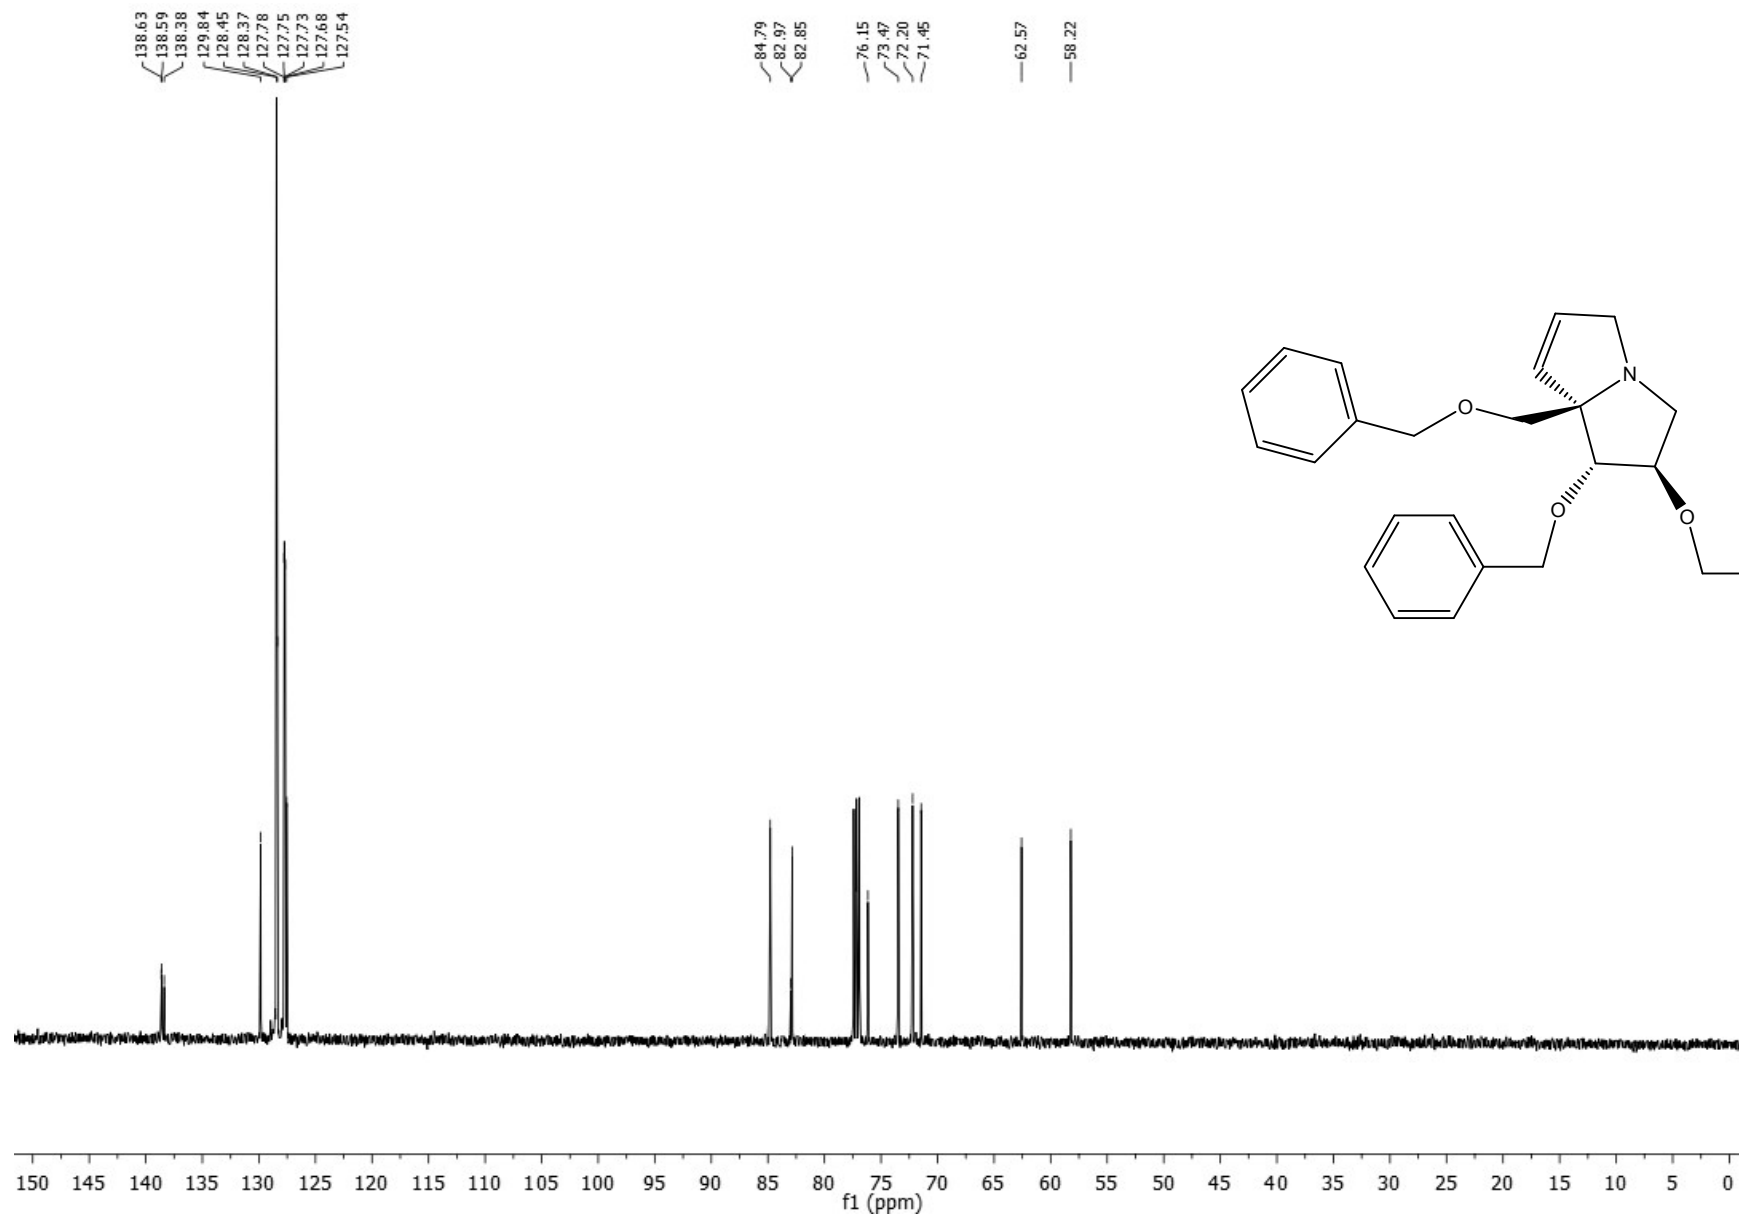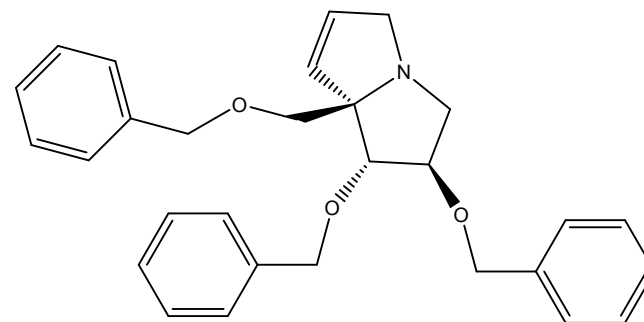

<sup>1</sup>H-NMR spectrum of 24b (CDCl<sub>3</sub>)

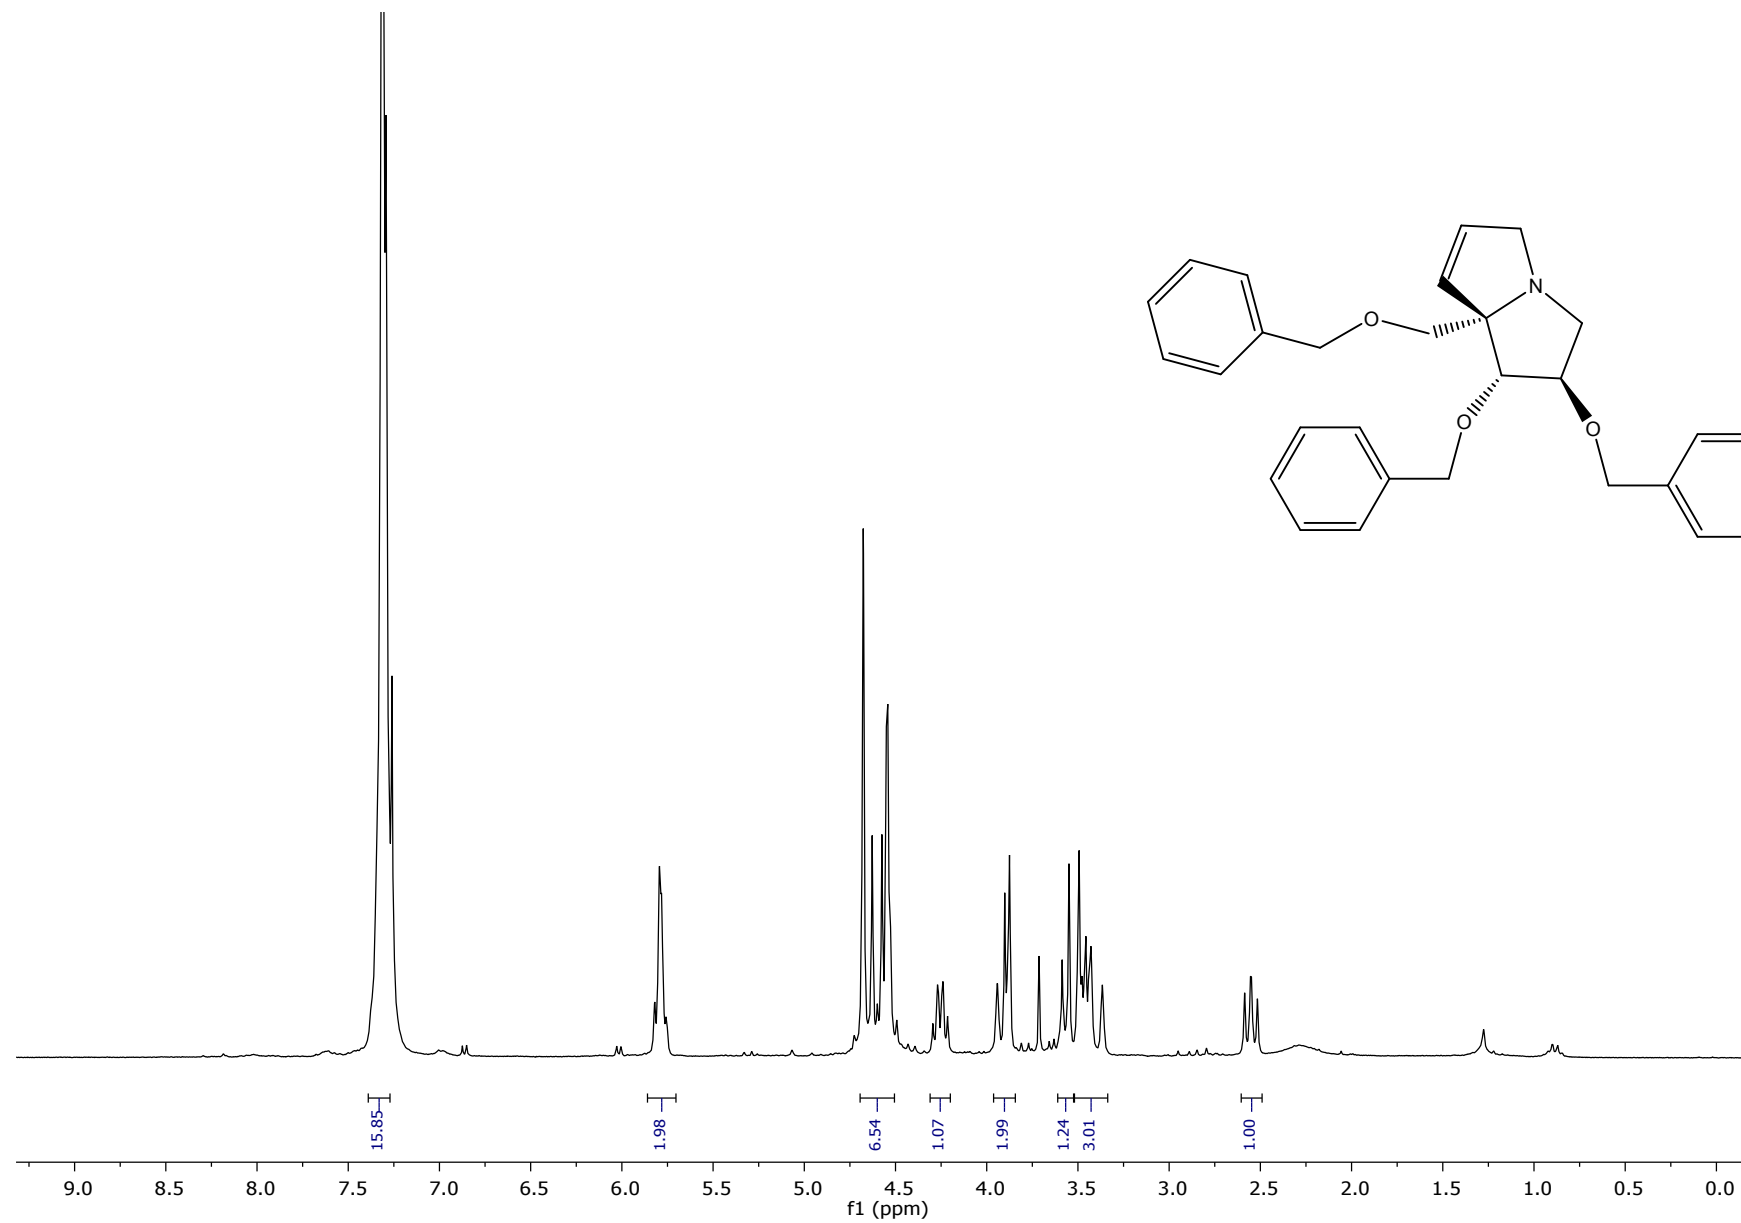

<sup>13</sup>C-NMR spectrum of 24b (CDCl<sub>3</sub>)

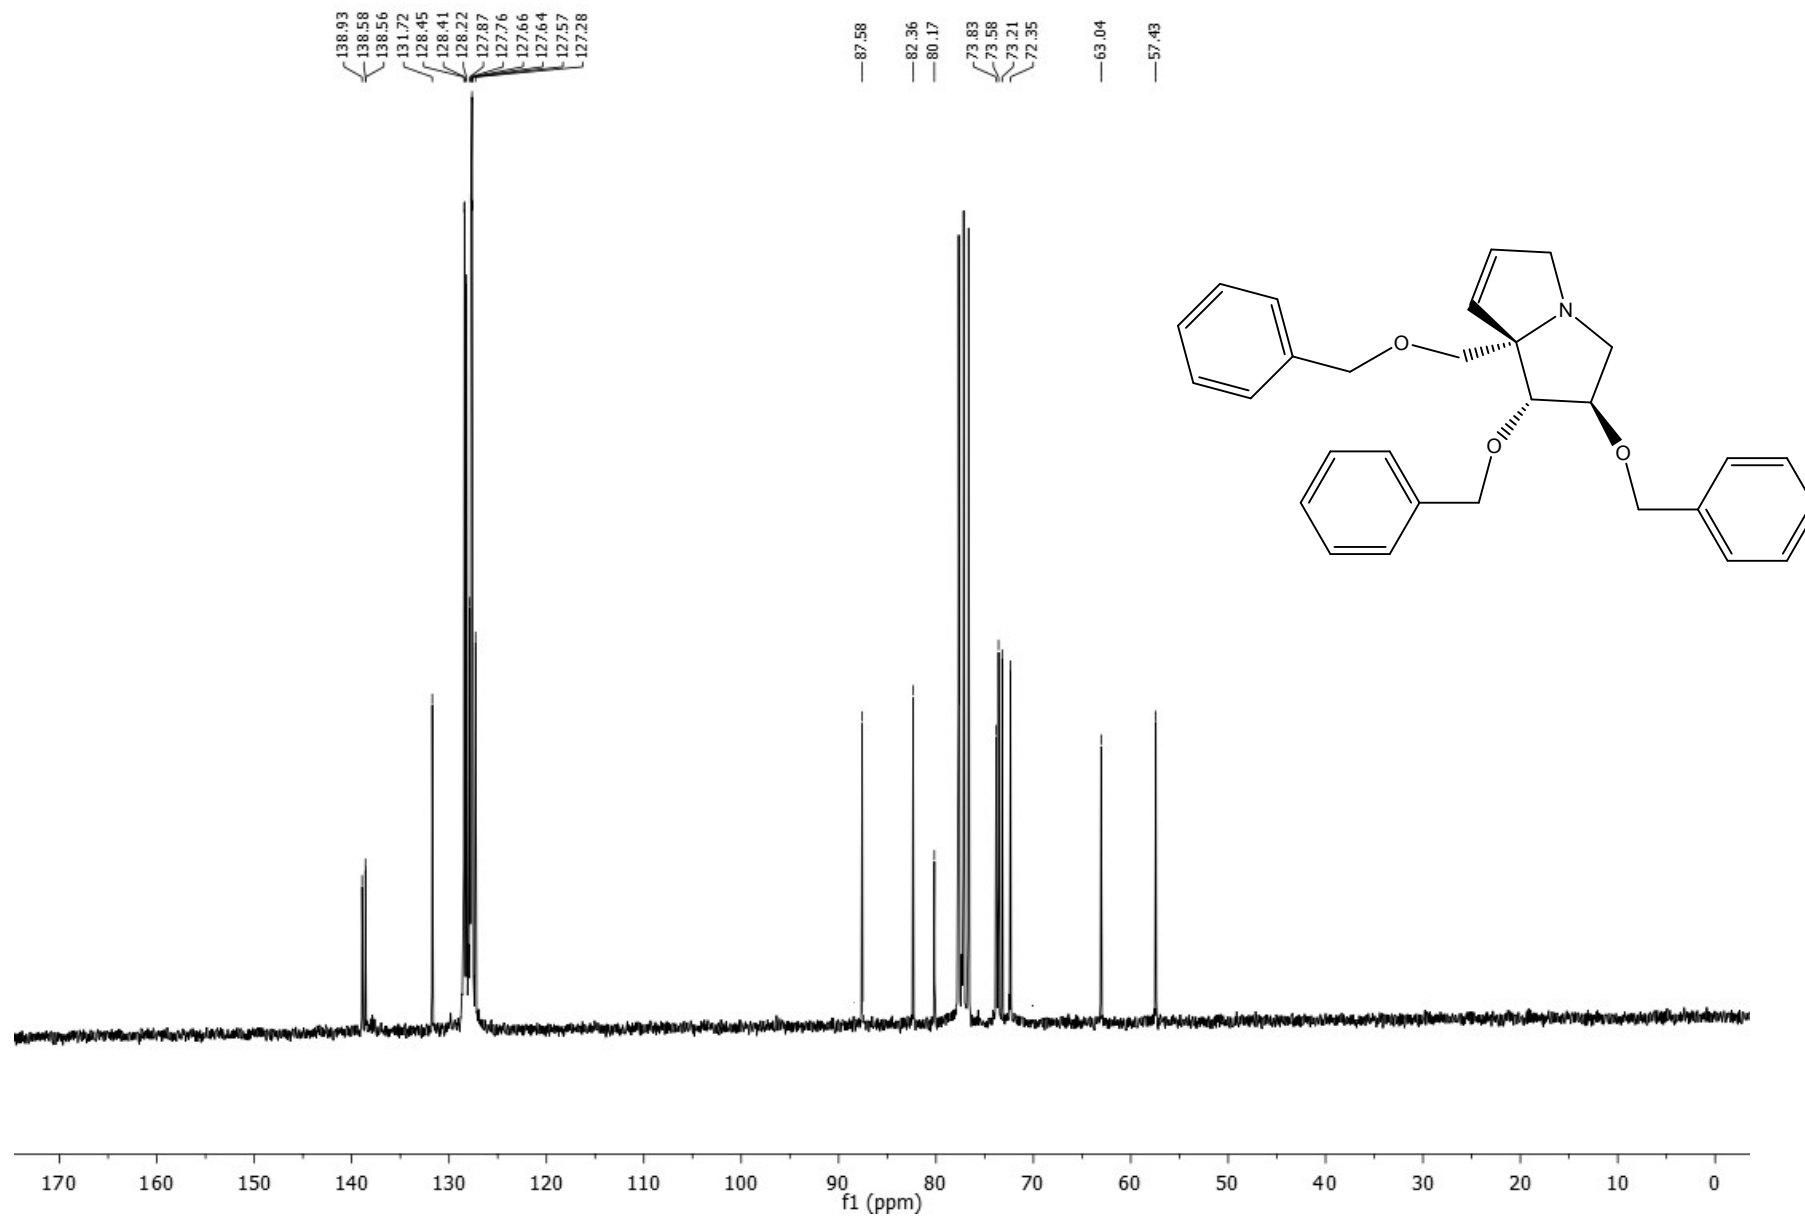

<sup>1</sup>H-NMR spectrum of 25a (CDCl<sub>3</sub>)

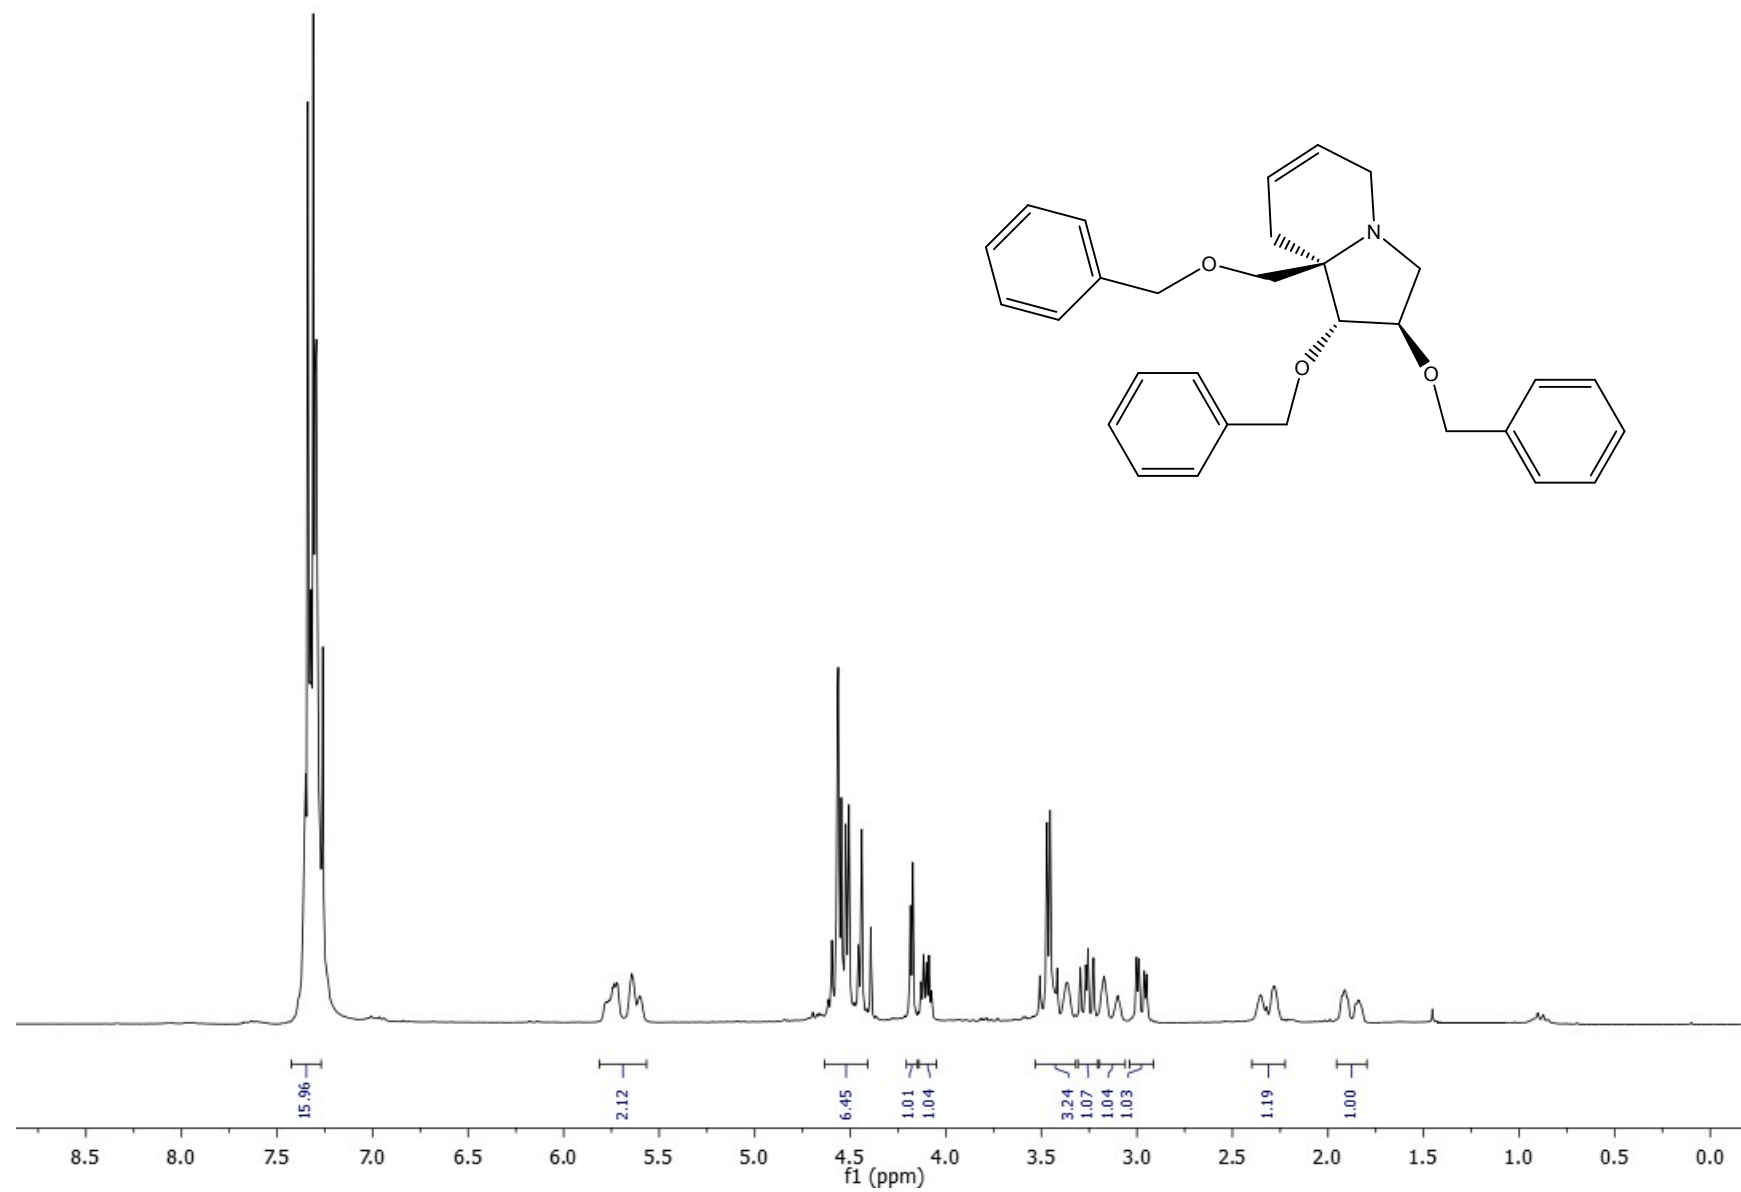

<sup>13</sup>C-NMR spectrum of 25a (CDCl<sub>3</sub>)

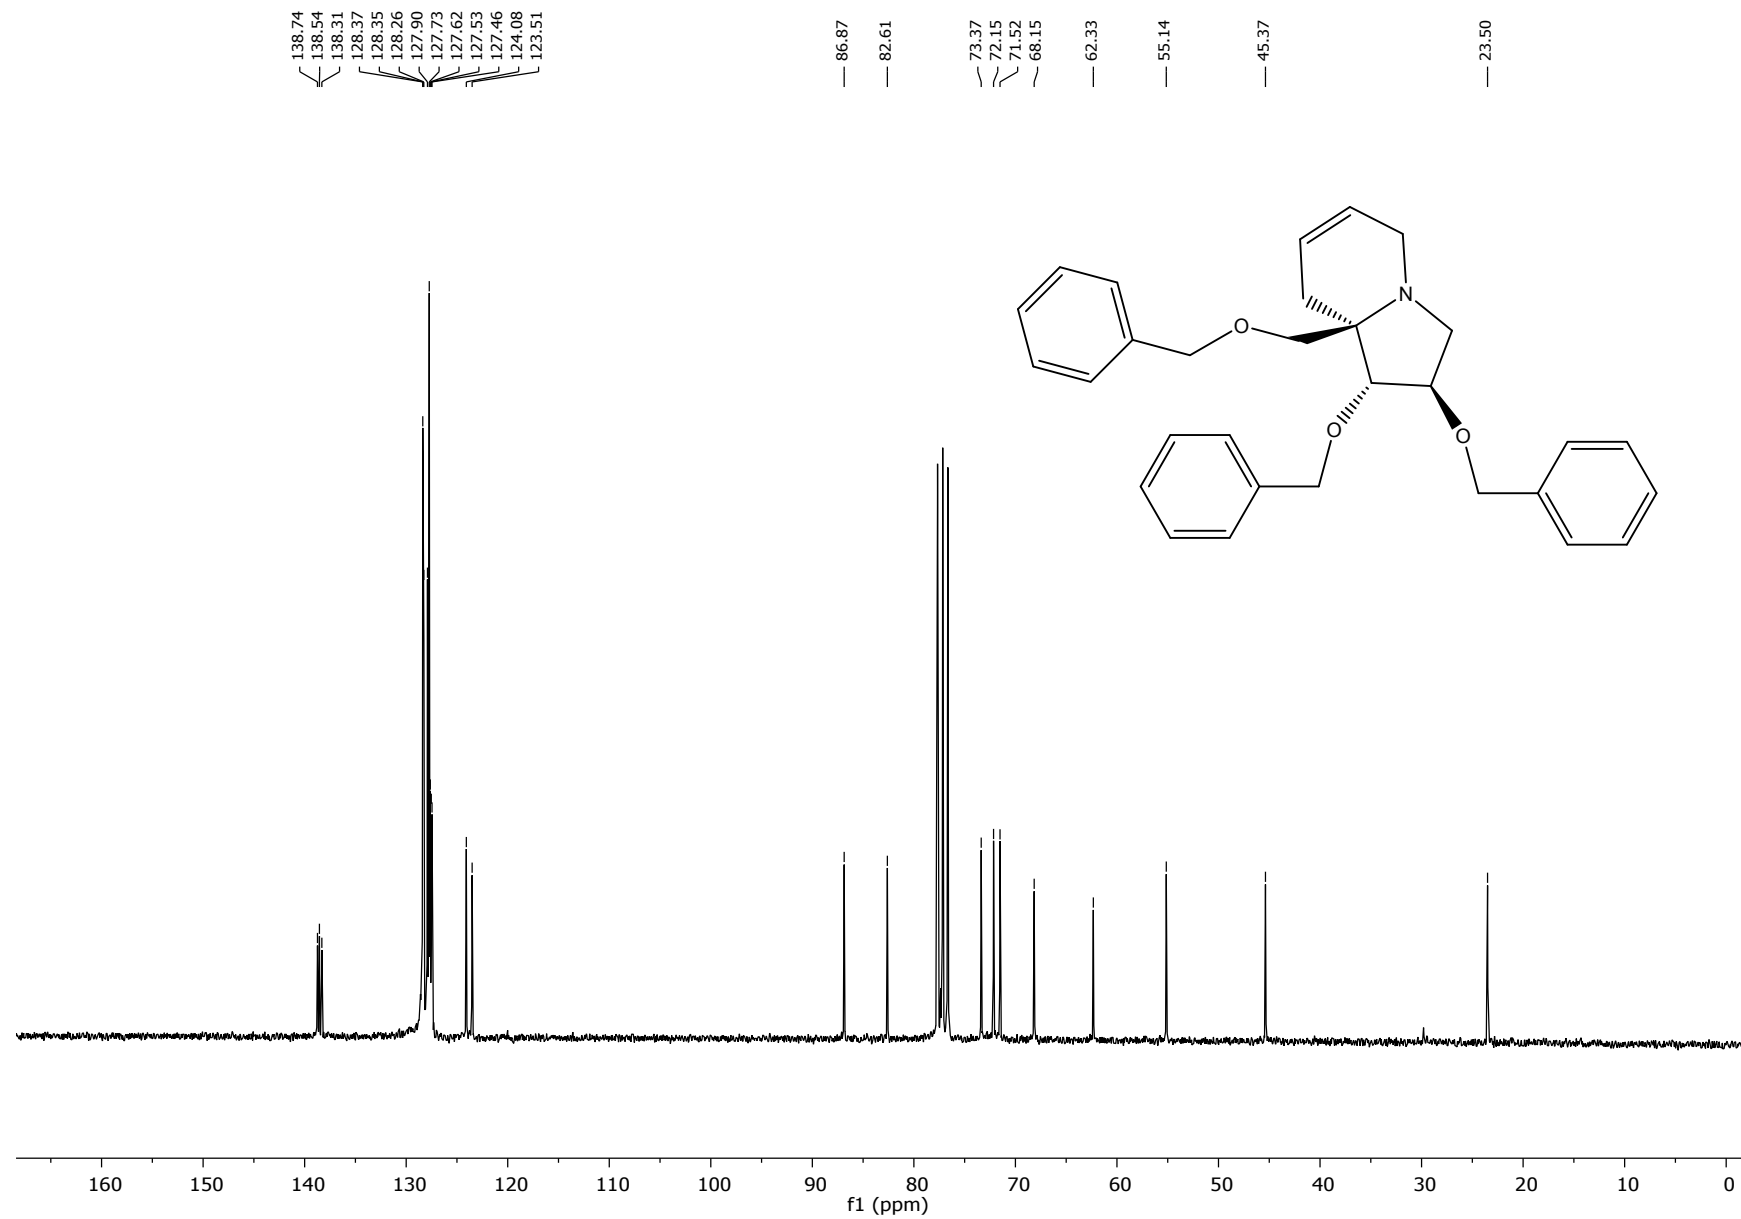



<sup>1</sup>H-NMR spectrum of 25b (CDCl<sub>3</sub>)

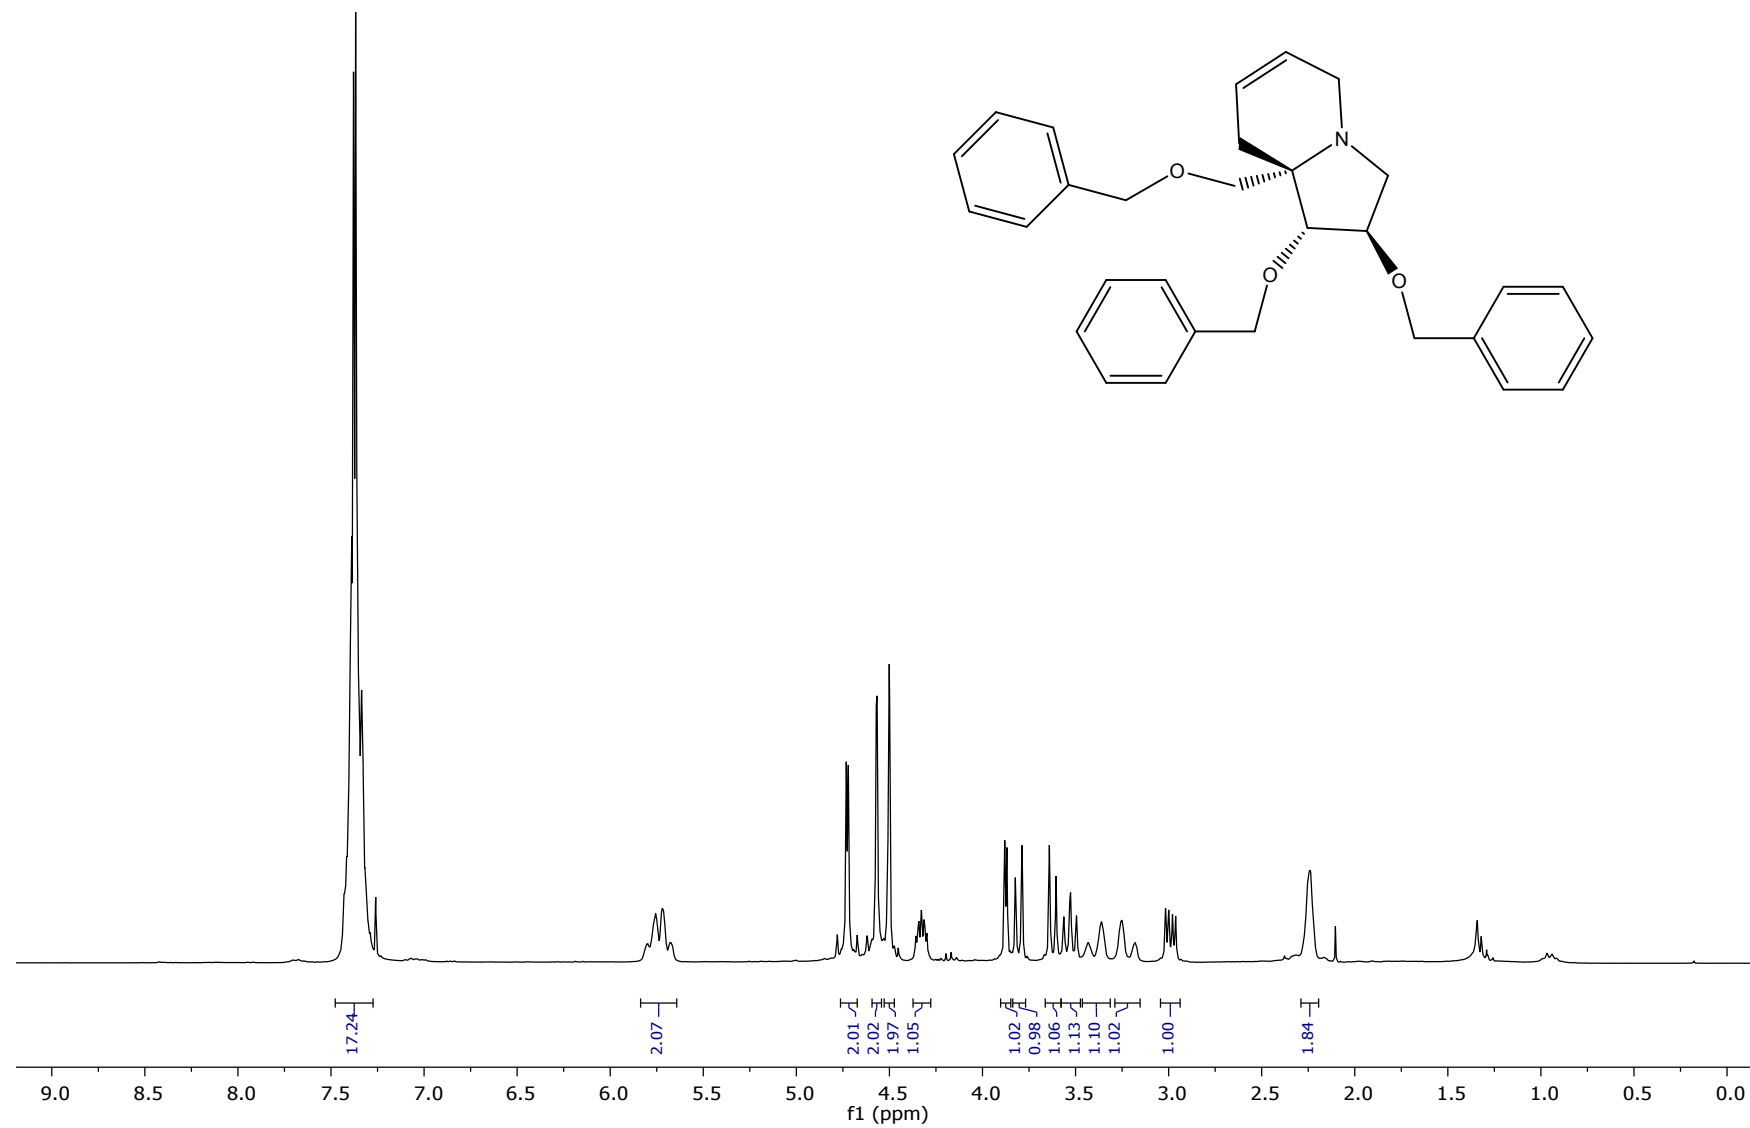

<sup>13</sup>C-NMR spectrum of 25b (CDCl<sub>3</sub>)

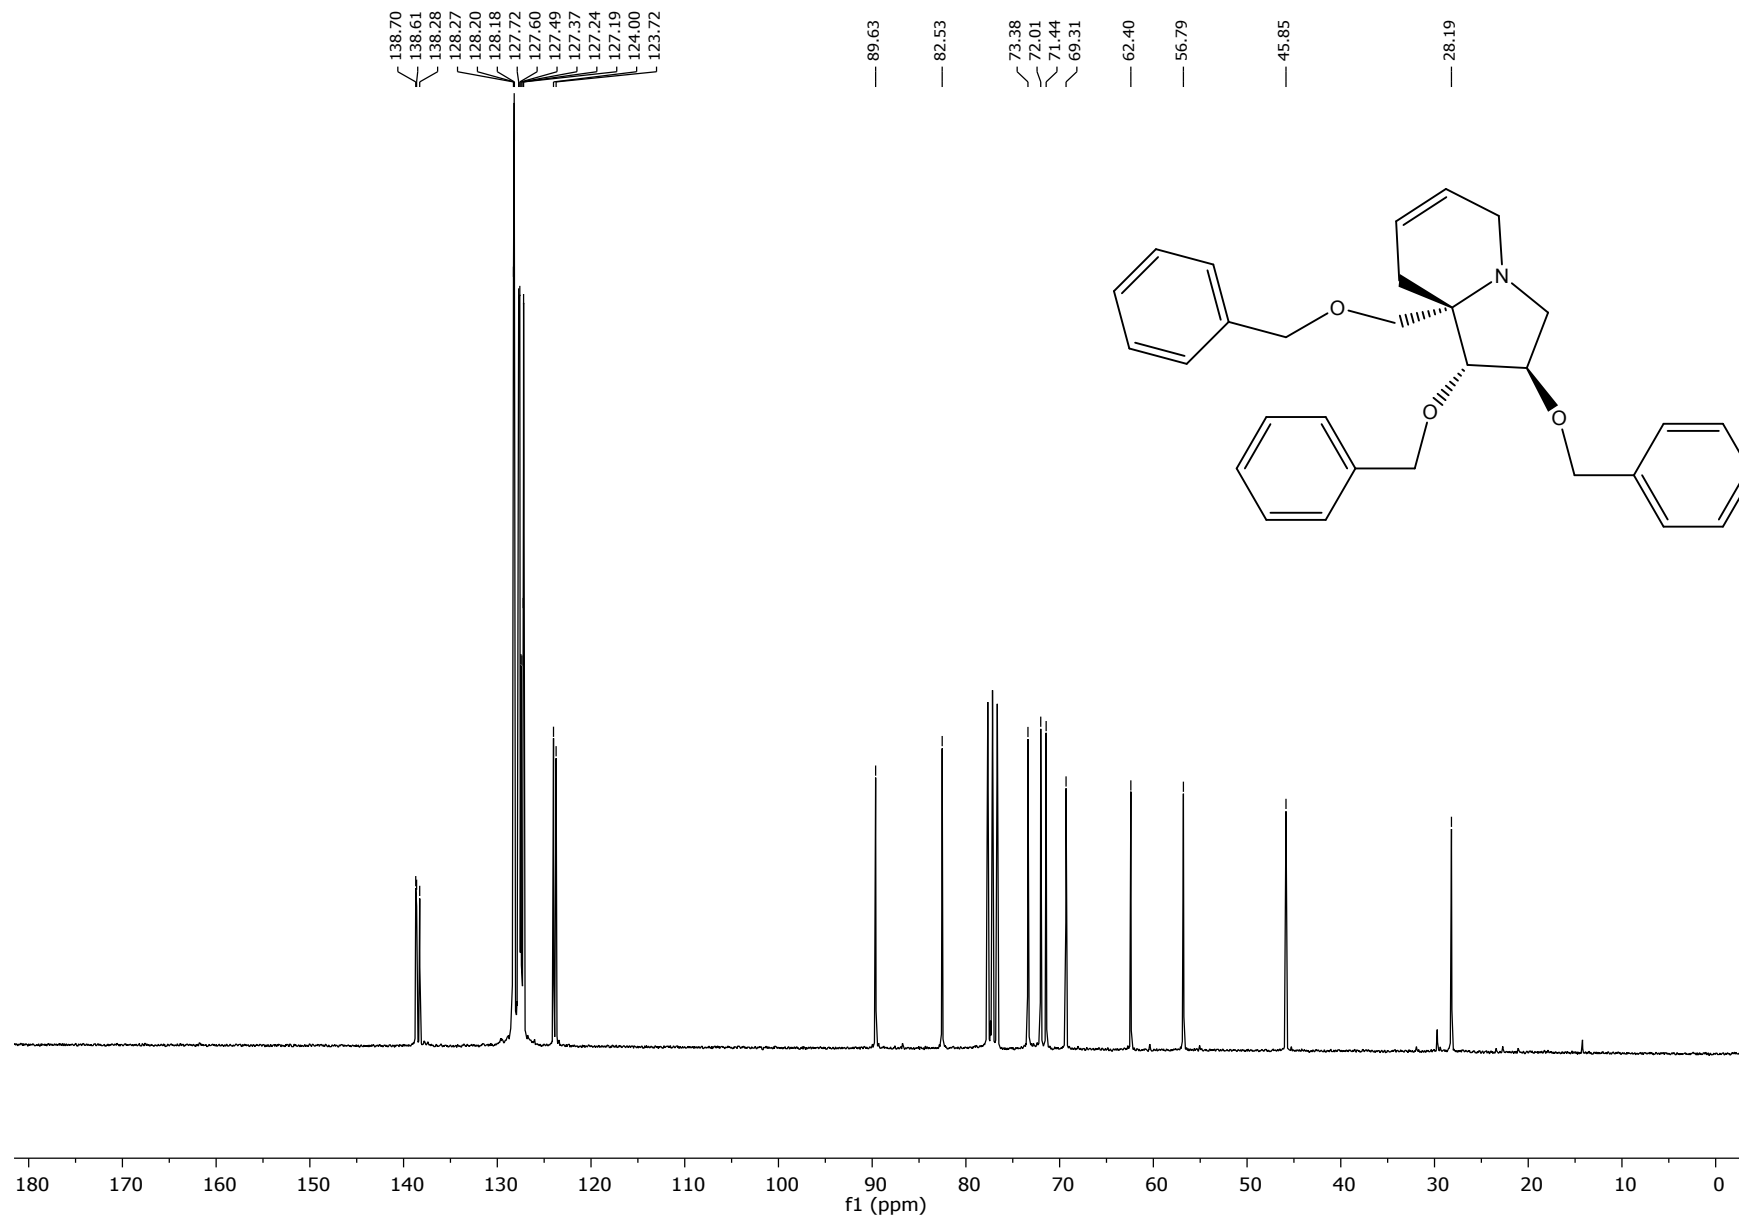

<sup>1</sup>H-NMR spectrum of 5a (D<sub>2</sub>O)

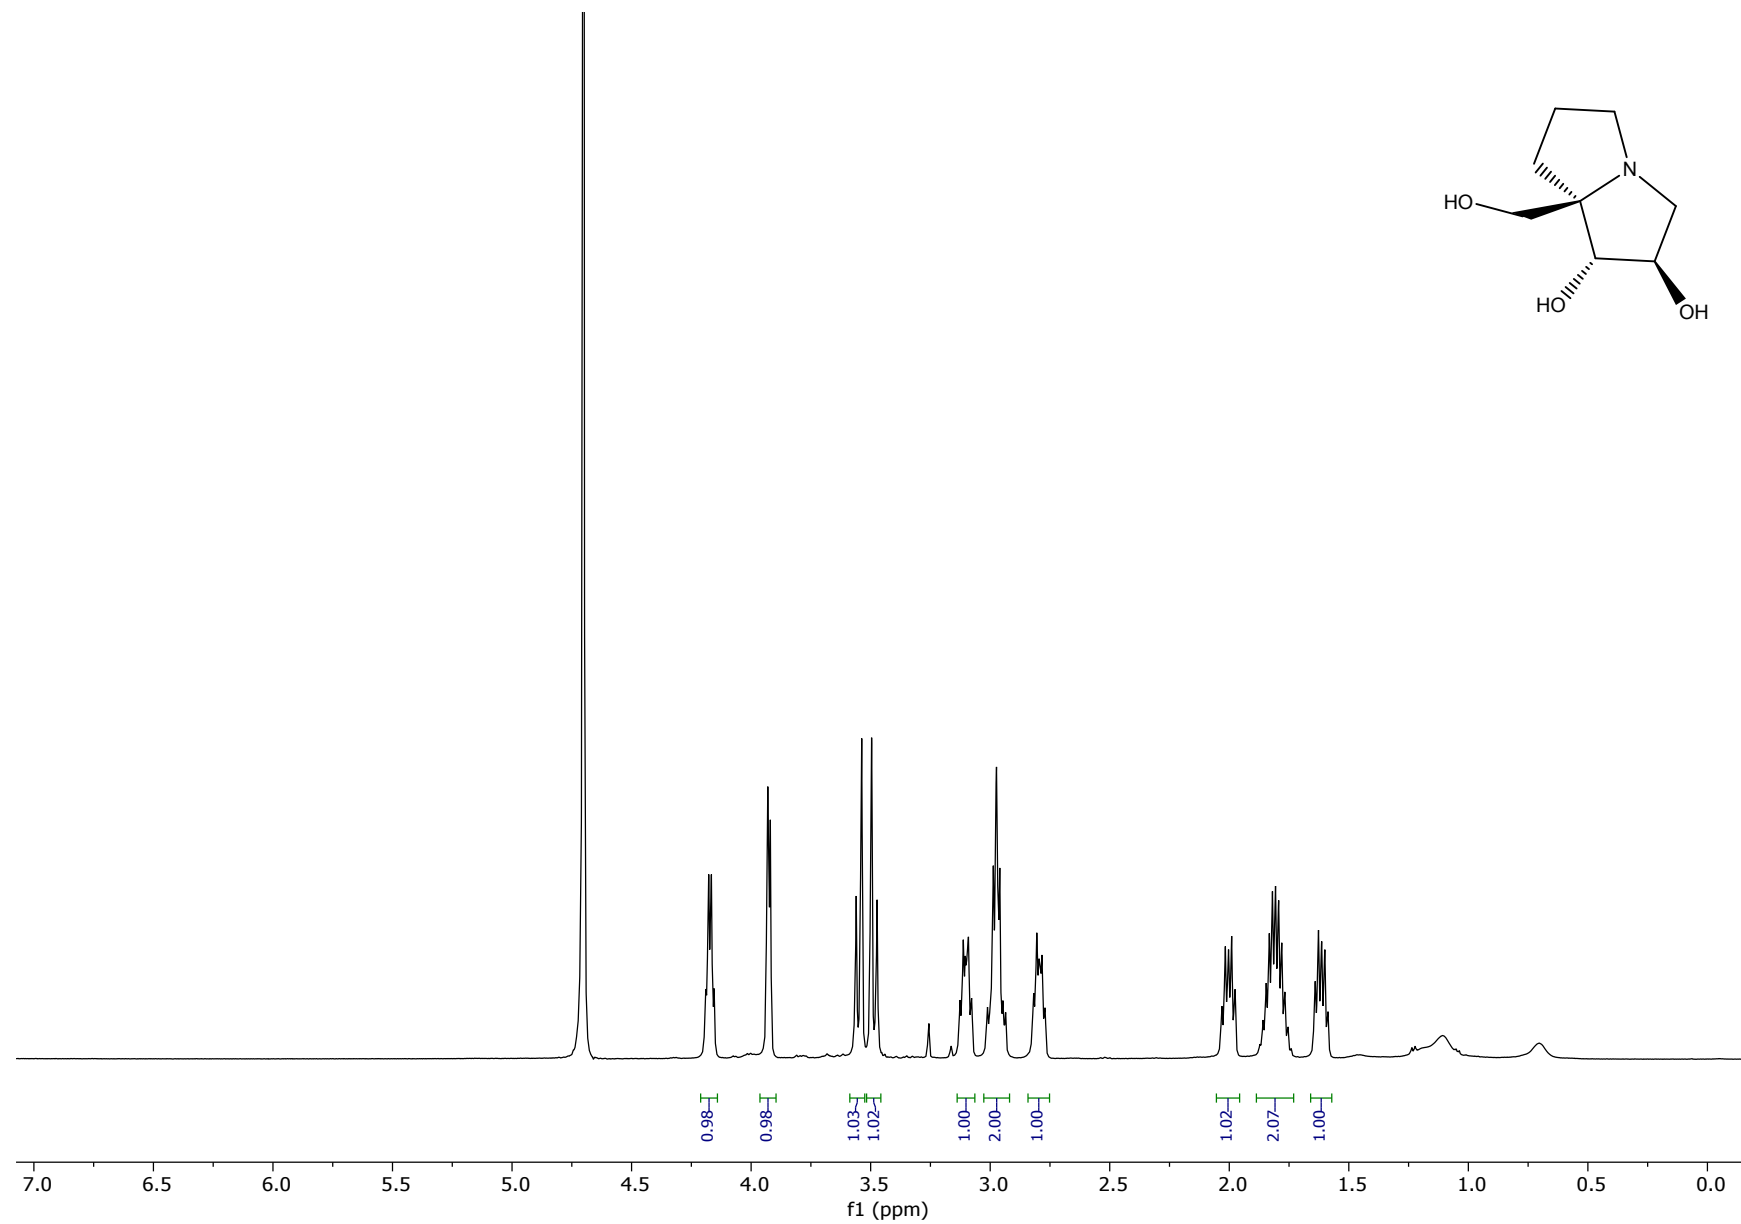

<sup>13</sup>C-NMR spectrum of 5a (D<sub>2</sub>O)

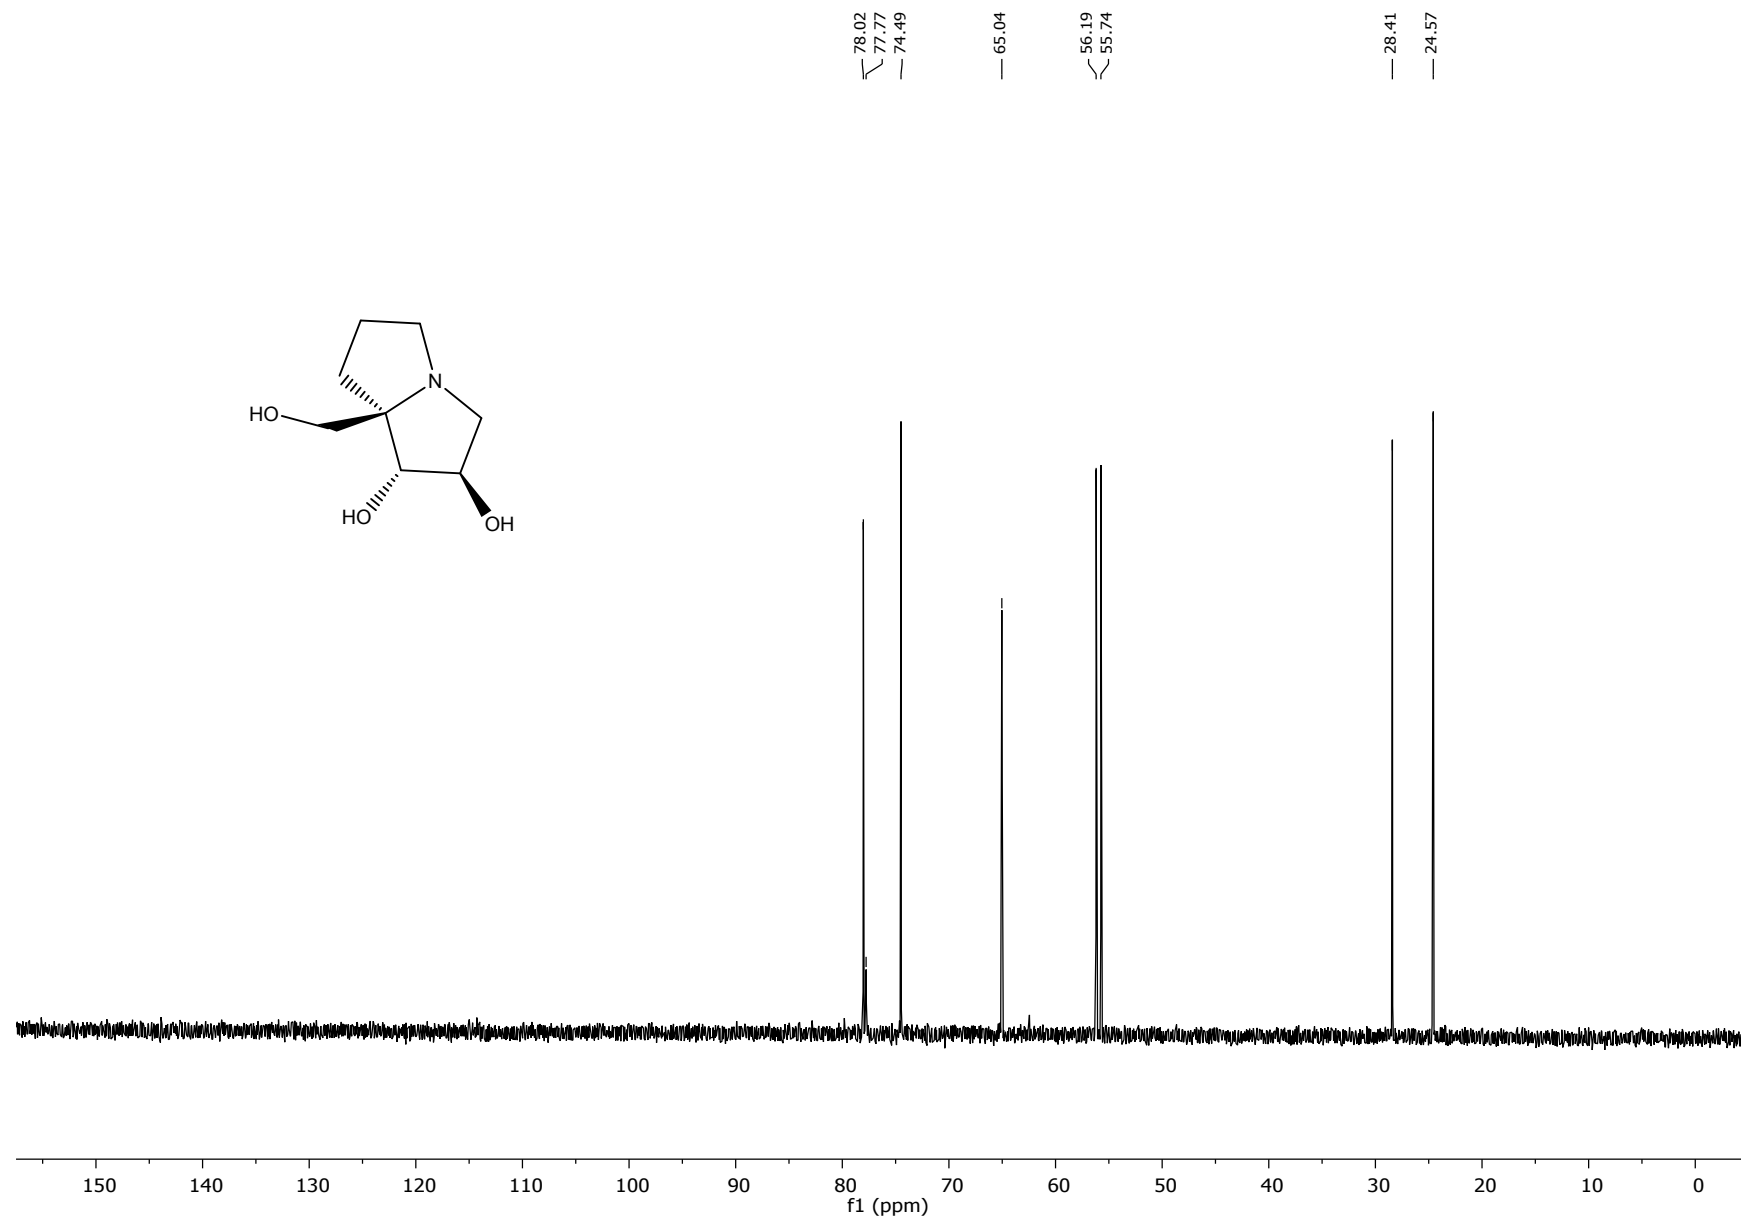

$^1\text{H-NMR}$  spectrum of 5b ( $\text{D}_2\text{O}$ )

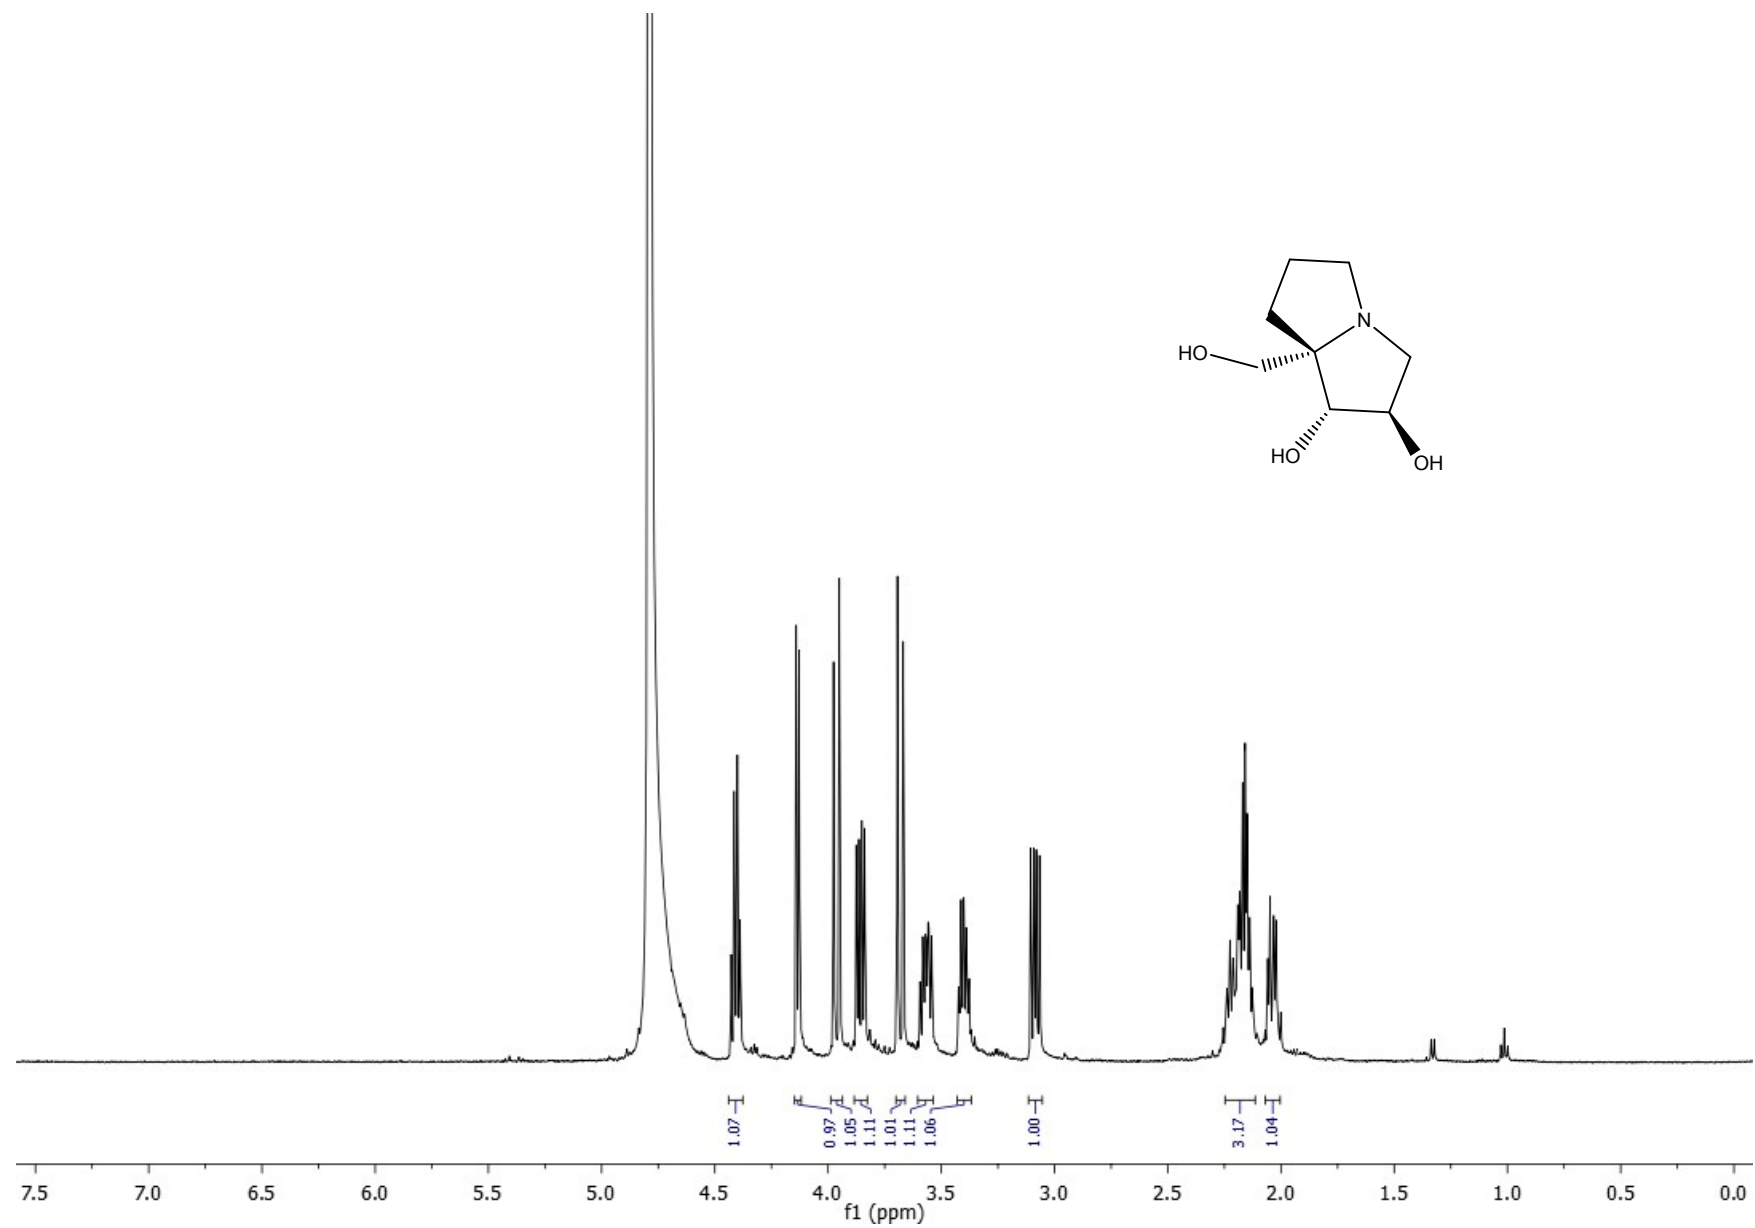

<sup>13</sup>C-NMR spectrum of 5b (D<sub>2</sub>O)

81.07  
79.96  
73.77  
60.86  
56.51  
55.39  
32.34  
23.55

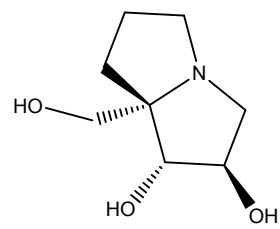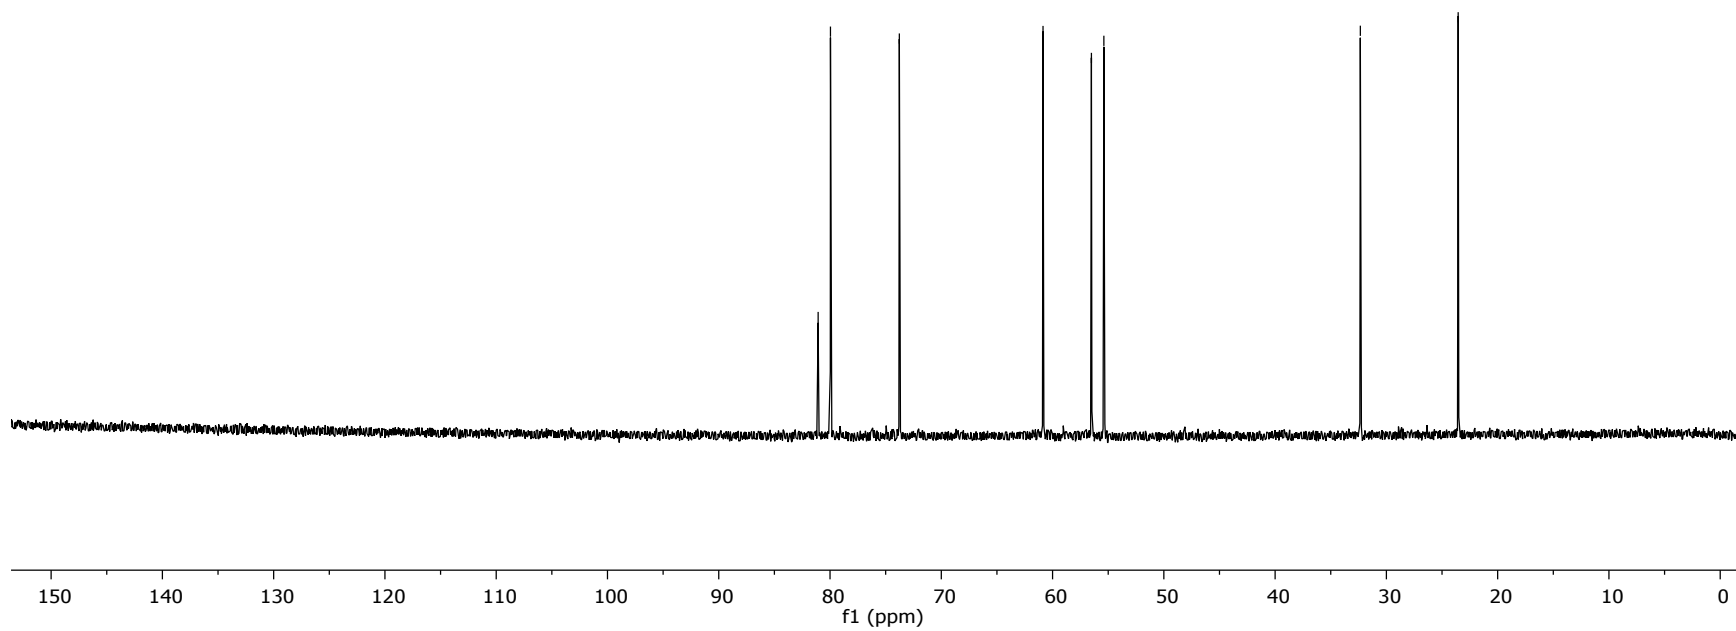

<sup>1</sup>H-NMR spectrum of 6a (D<sub>2</sub>O)

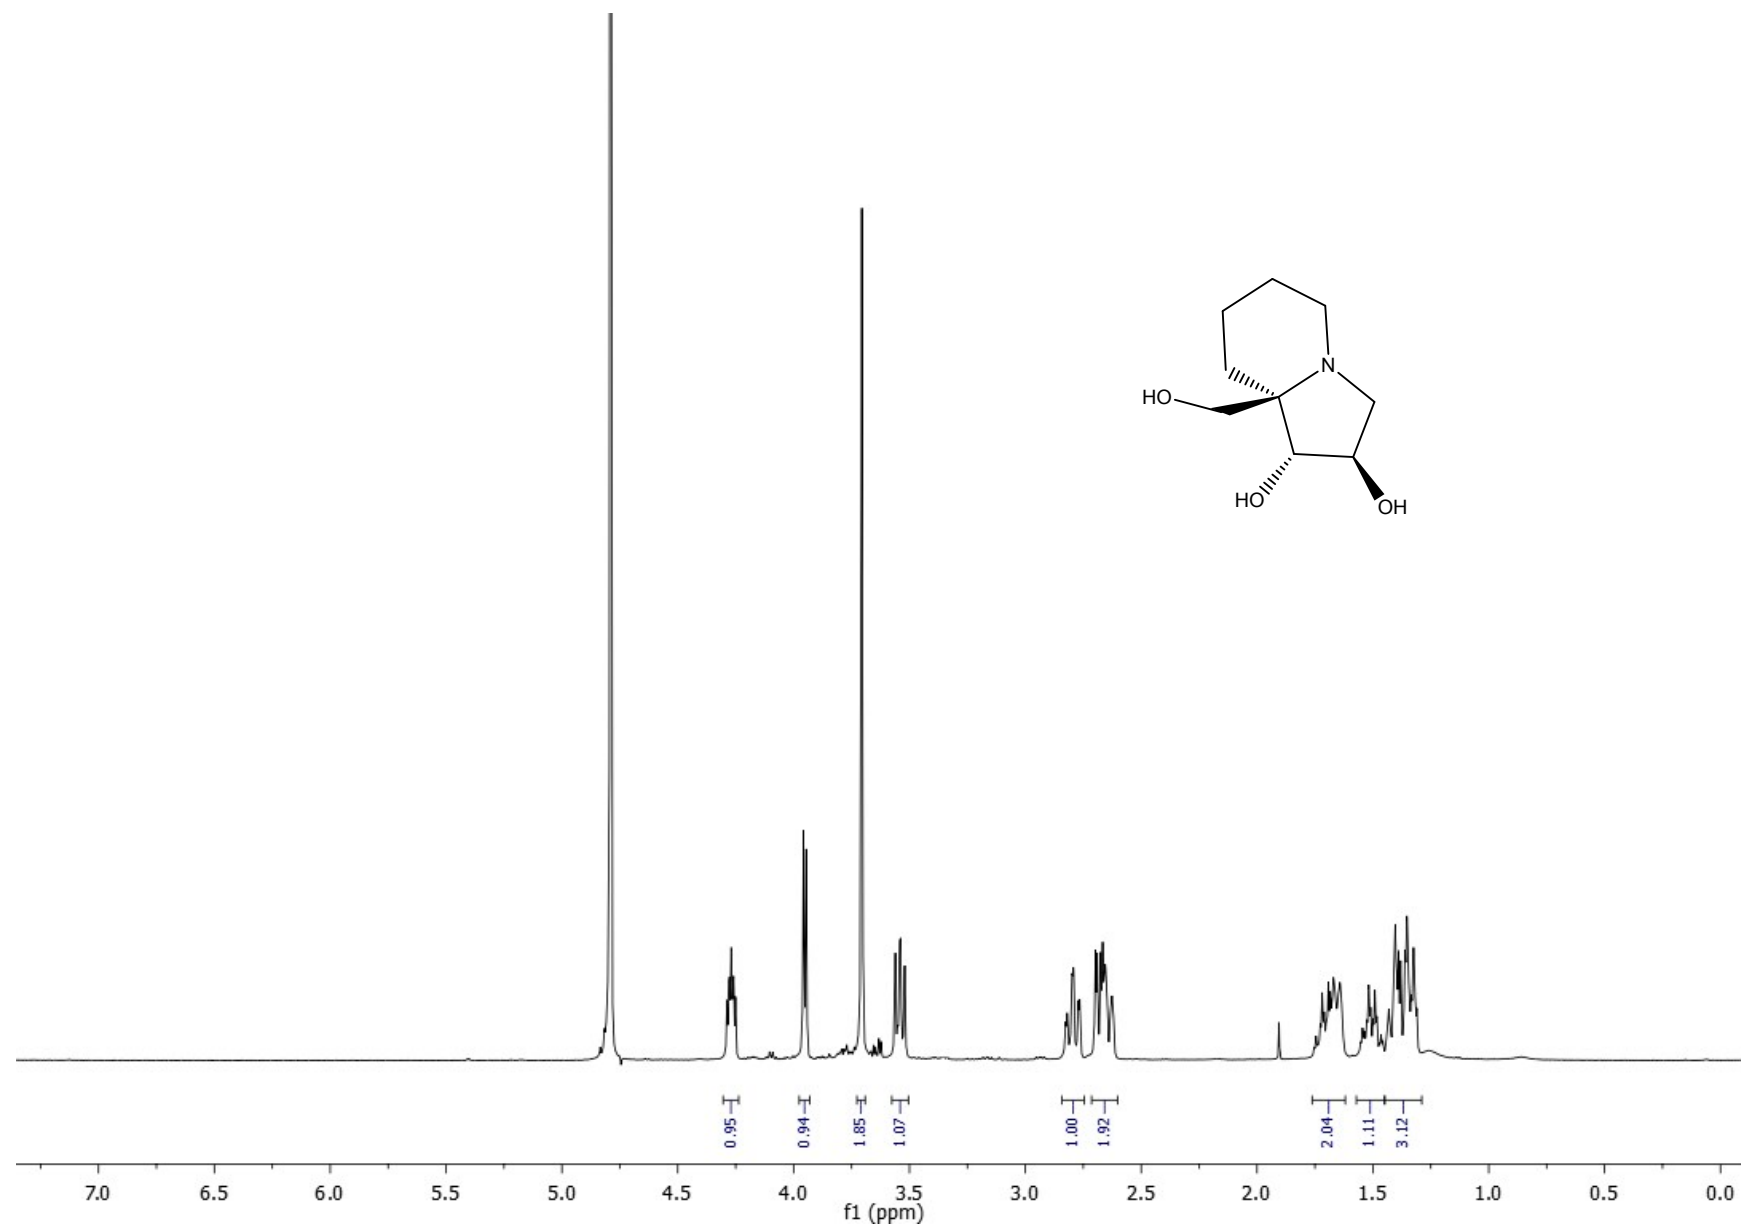

<sup>13</sup>C-NMR spectrum of 6a (D<sub>2</sub>O)

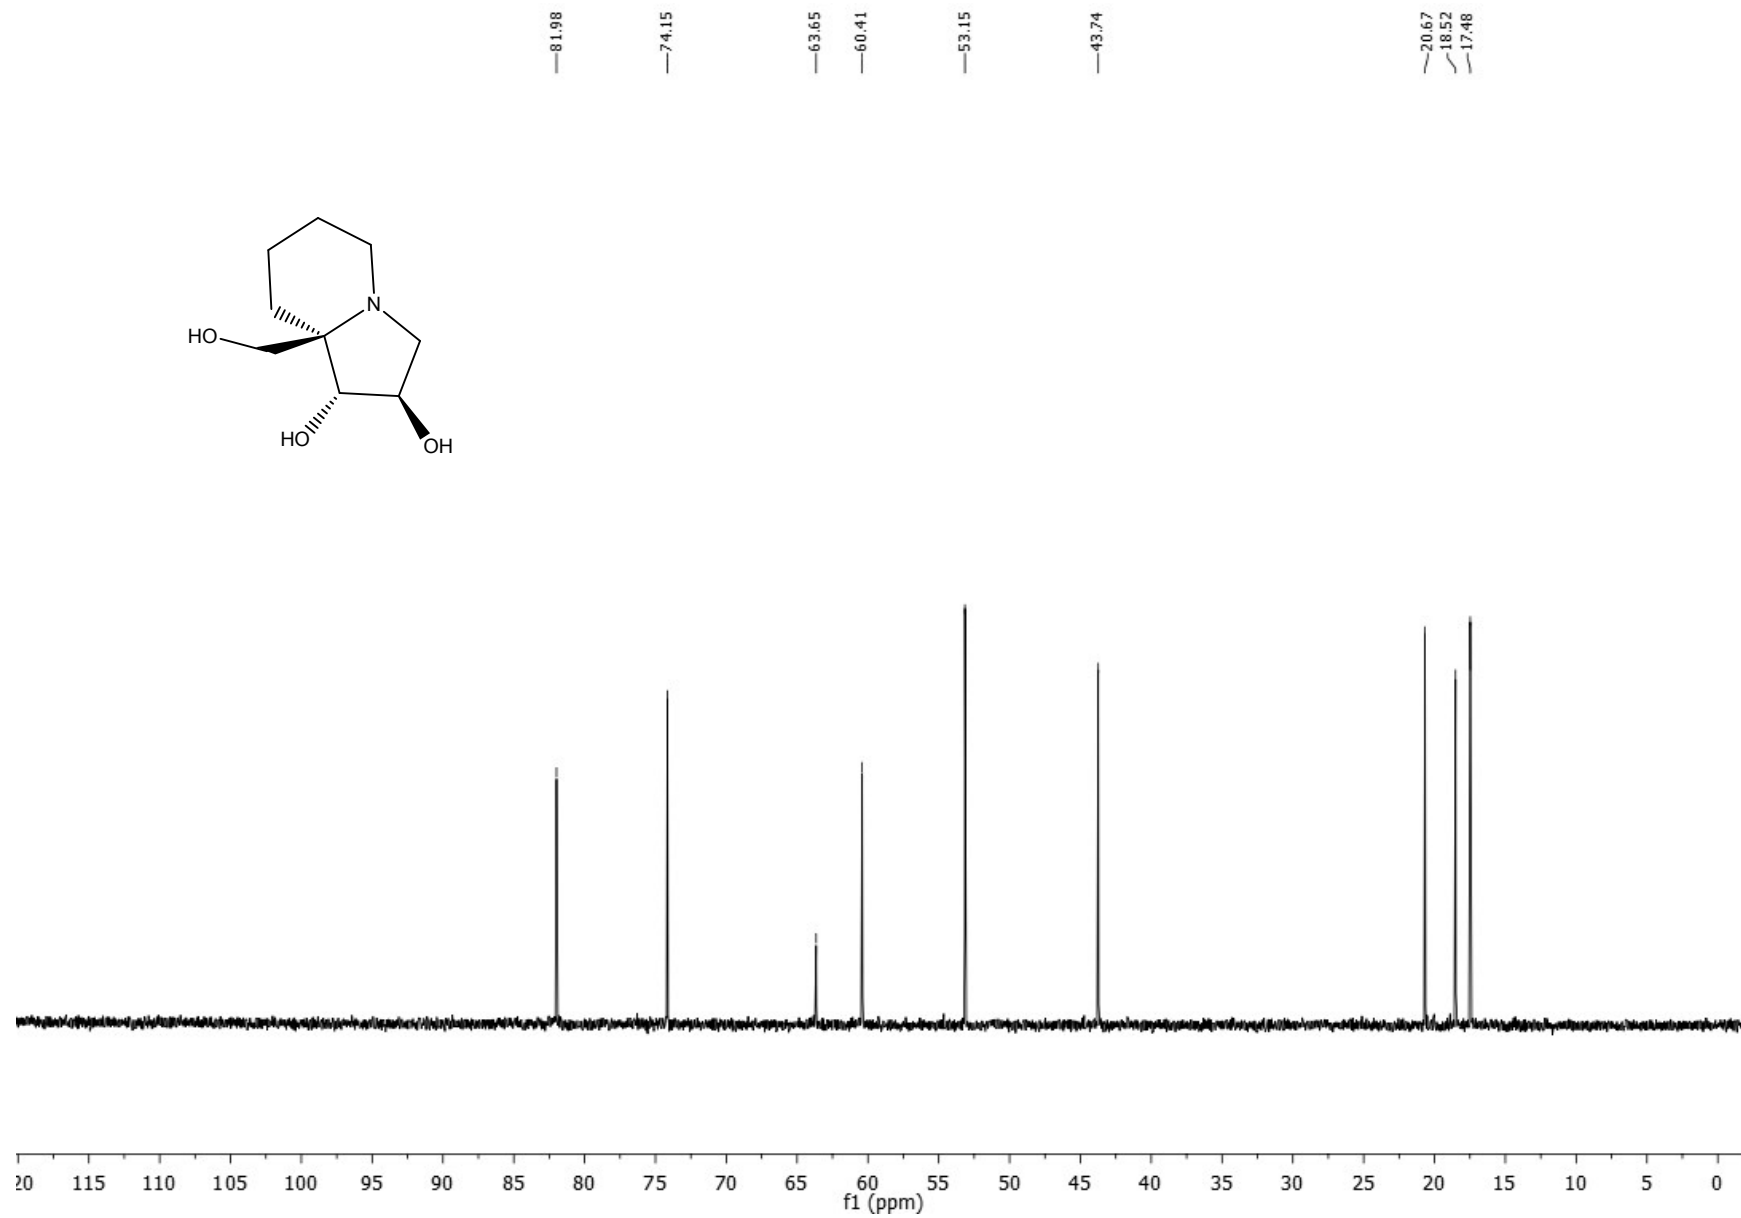



<sup>1</sup>H-NMR spectrum of 6b (D<sub>2</sub>O)

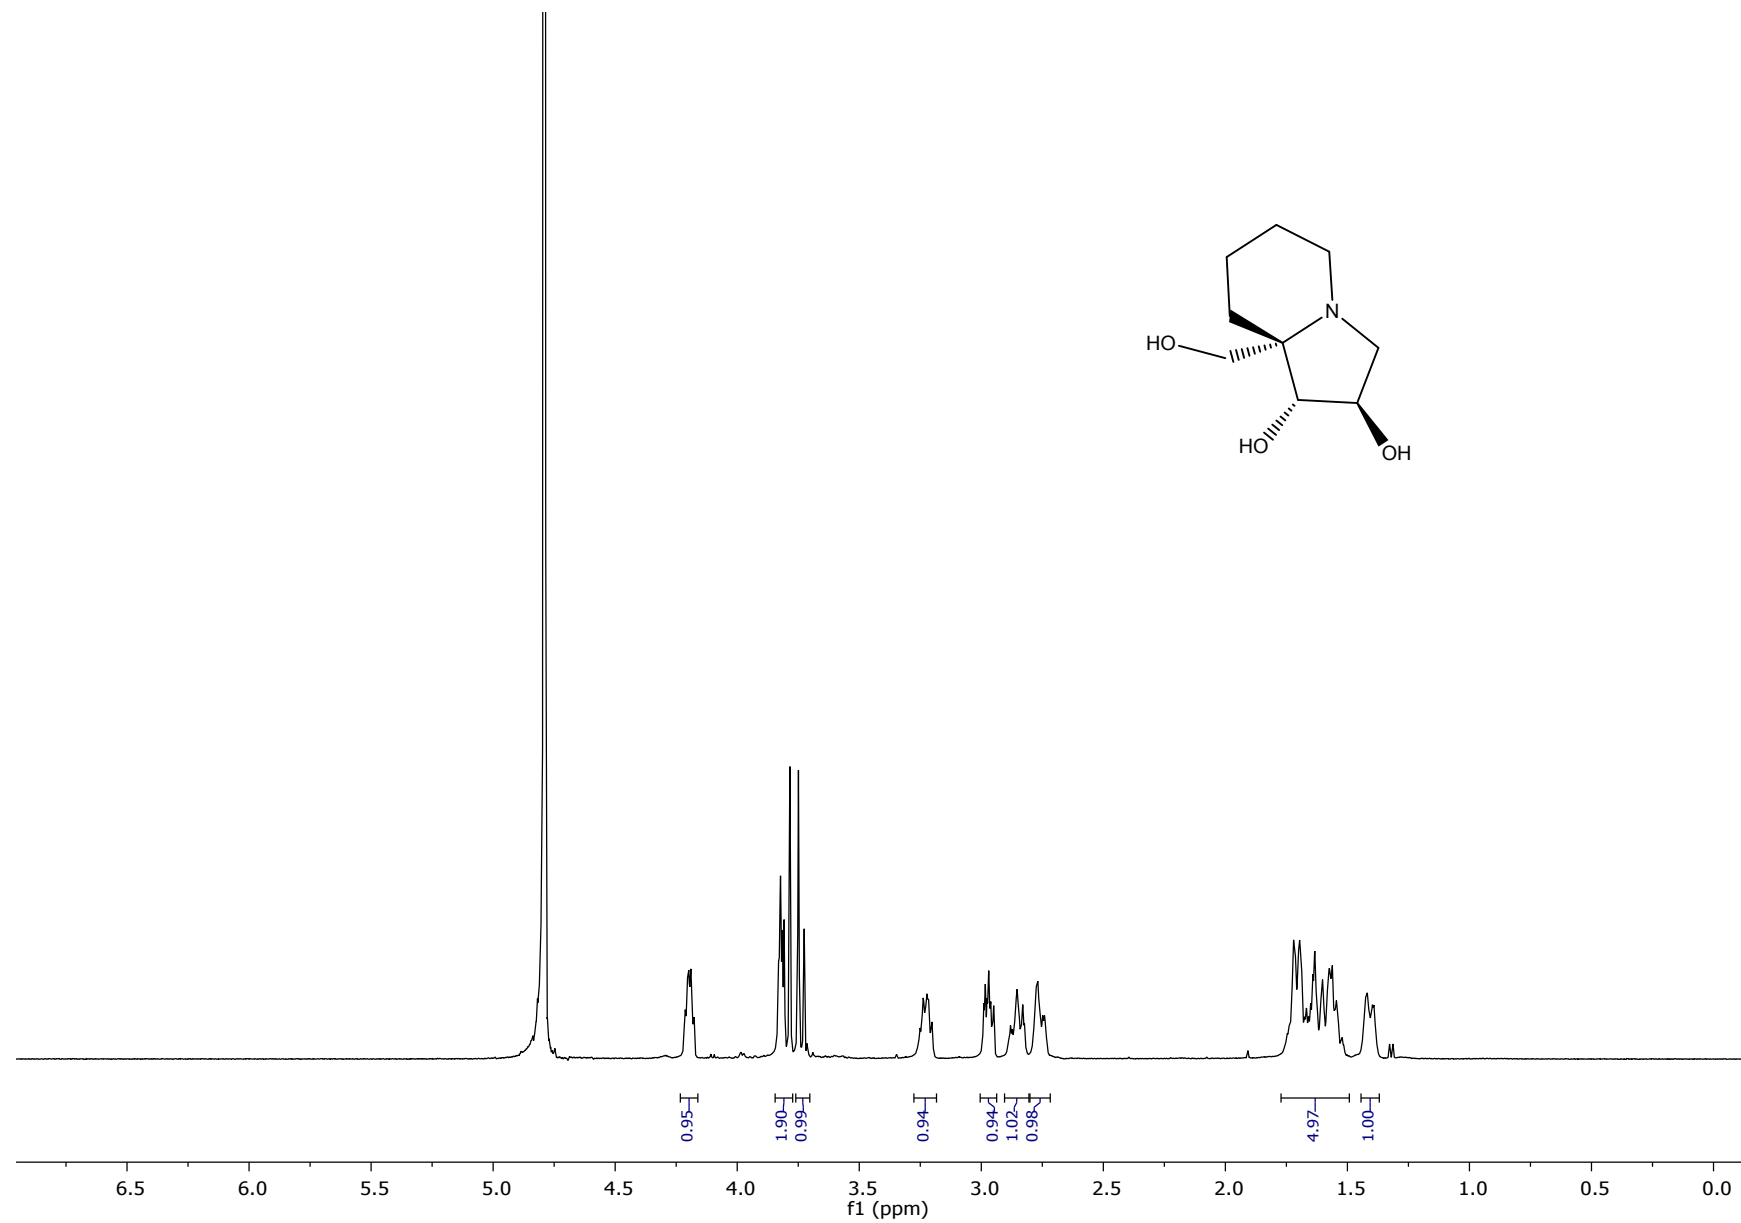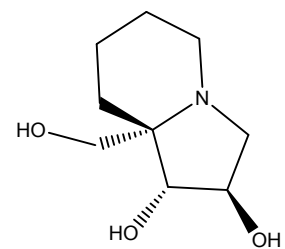

<sup>13</sup>C-NMR spectrum of 6b (D<sub>2</sub>O)

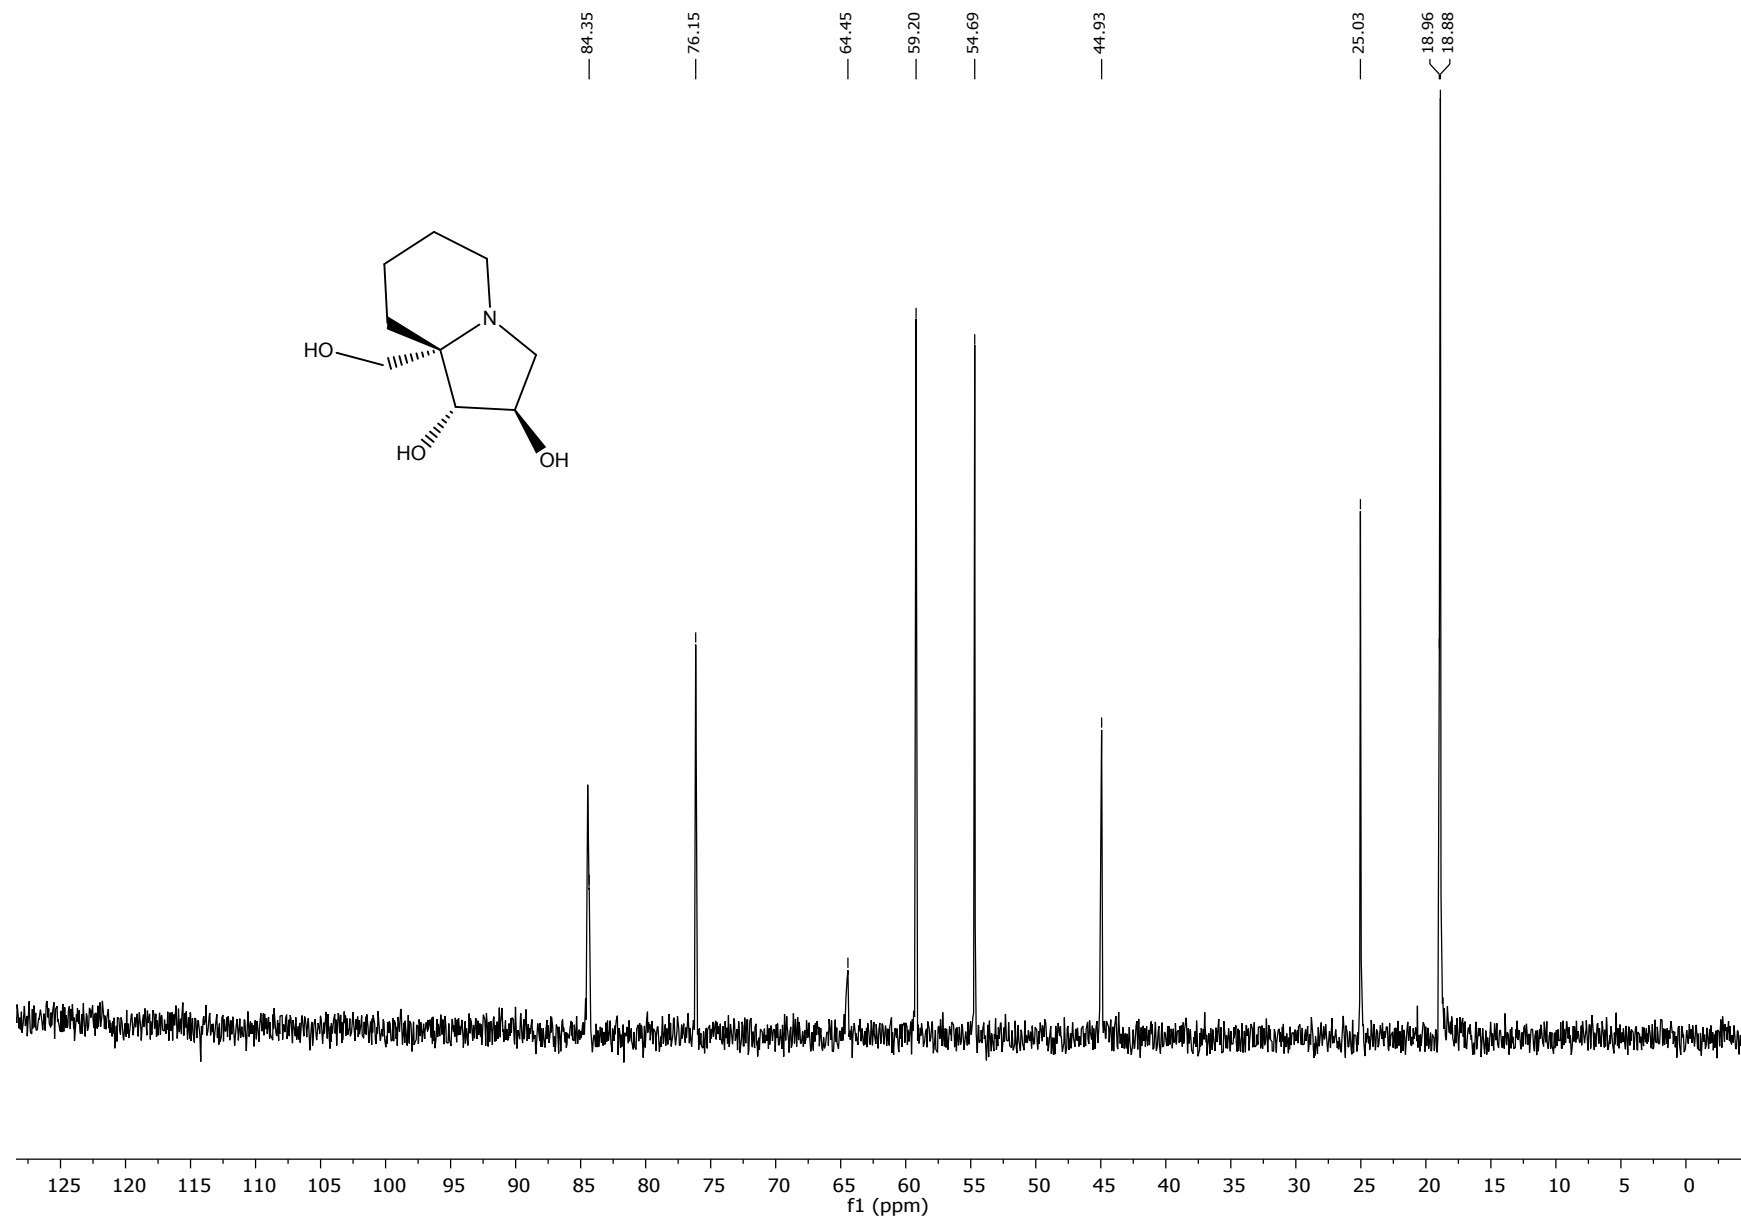

<sup>1</sup>H-NMR spectrum of DAB 7 (D<sub>2</sub>O)

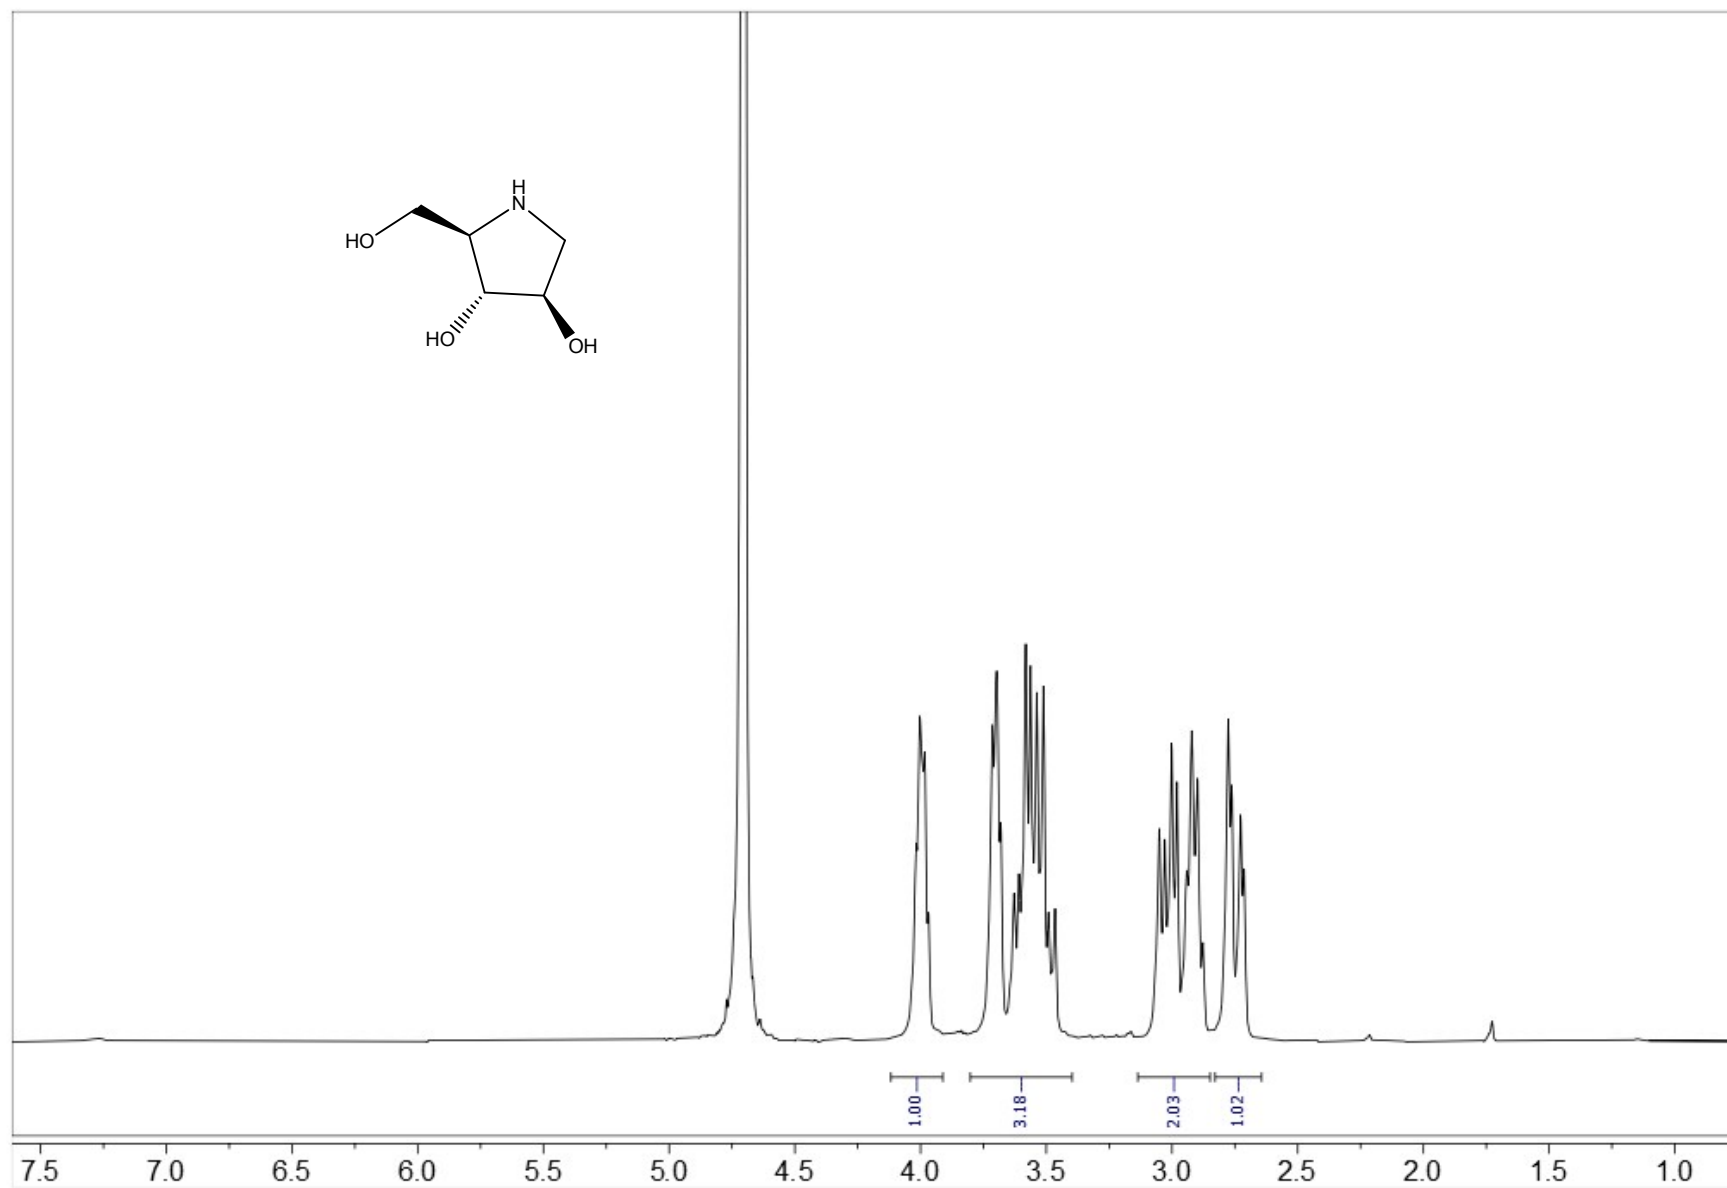

<sup>13</sup>C-NMR (DEPT) spectrum of DAB 7 (D<sub>2</sub>O)

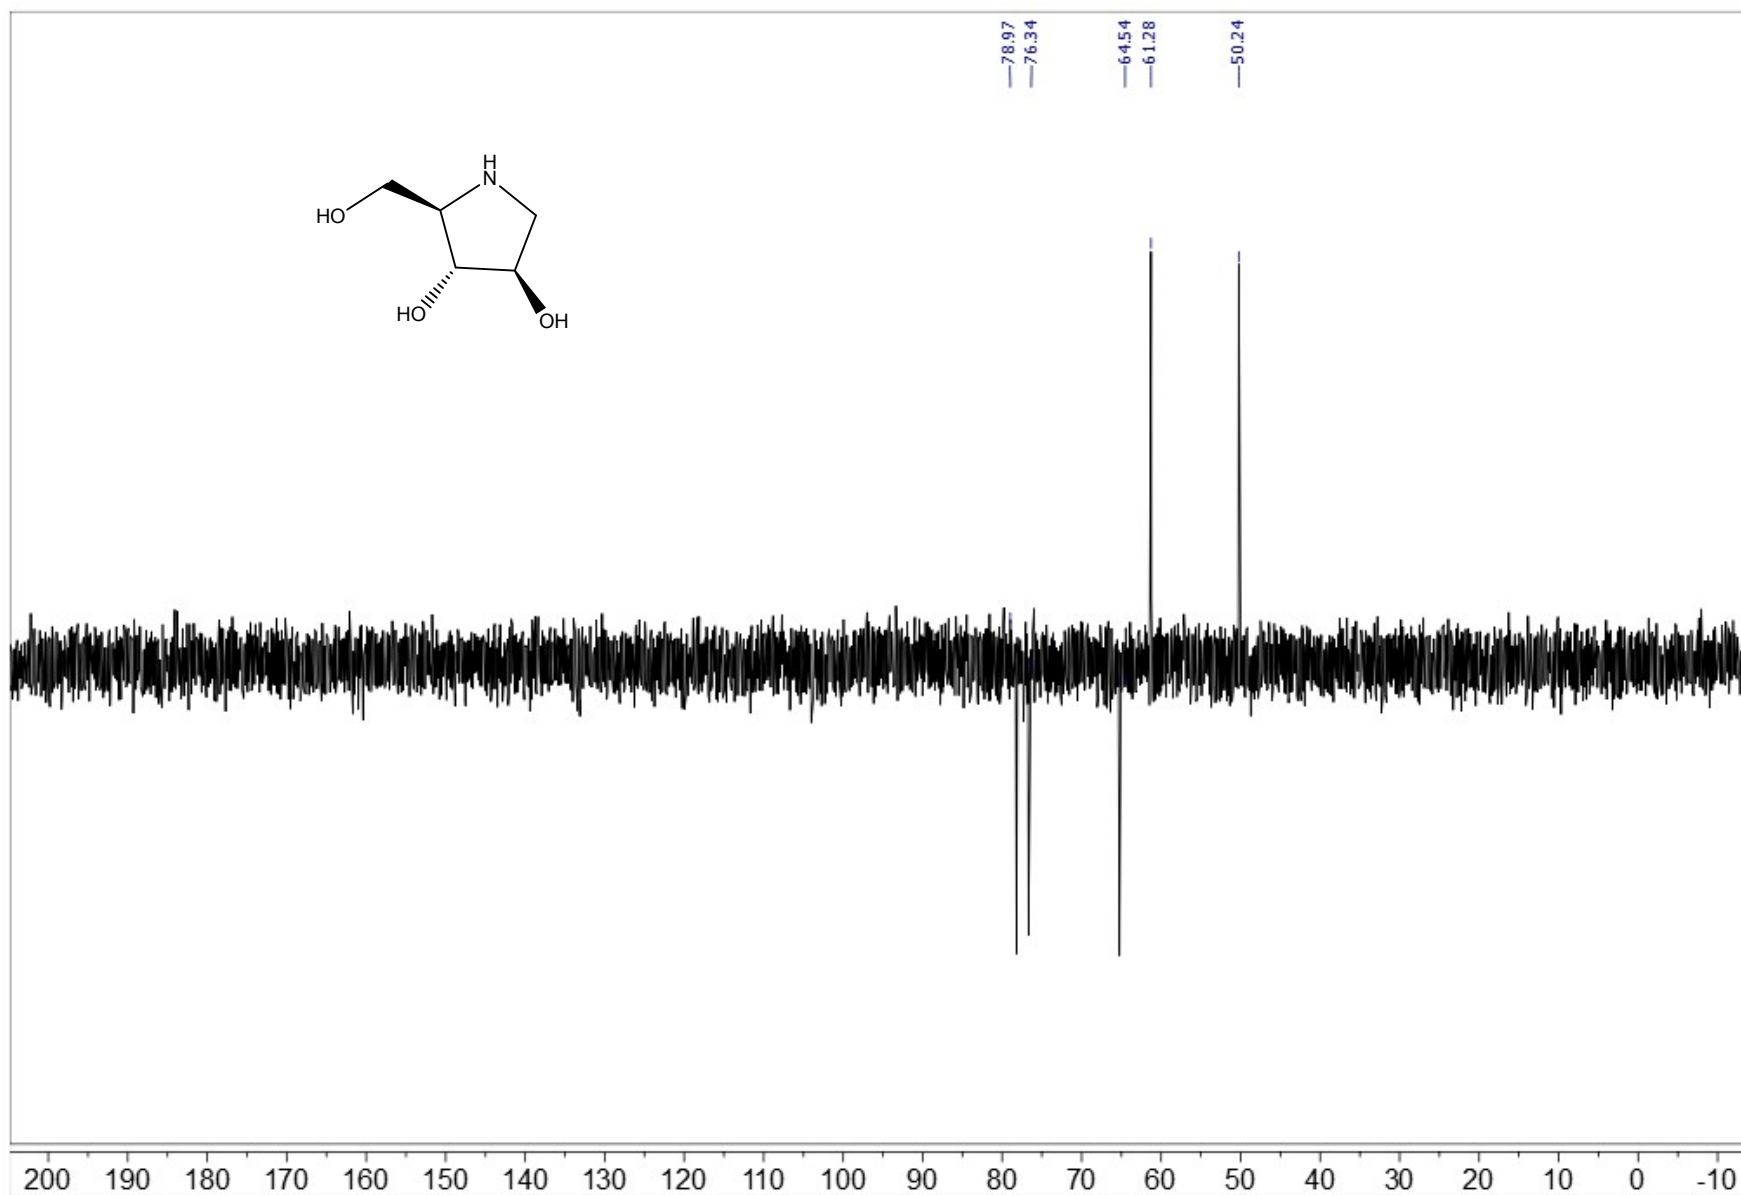

$^1\text{H-NMR}$  spectrum of DAB,HCl ( $\text{D}_2\text{O}$ )

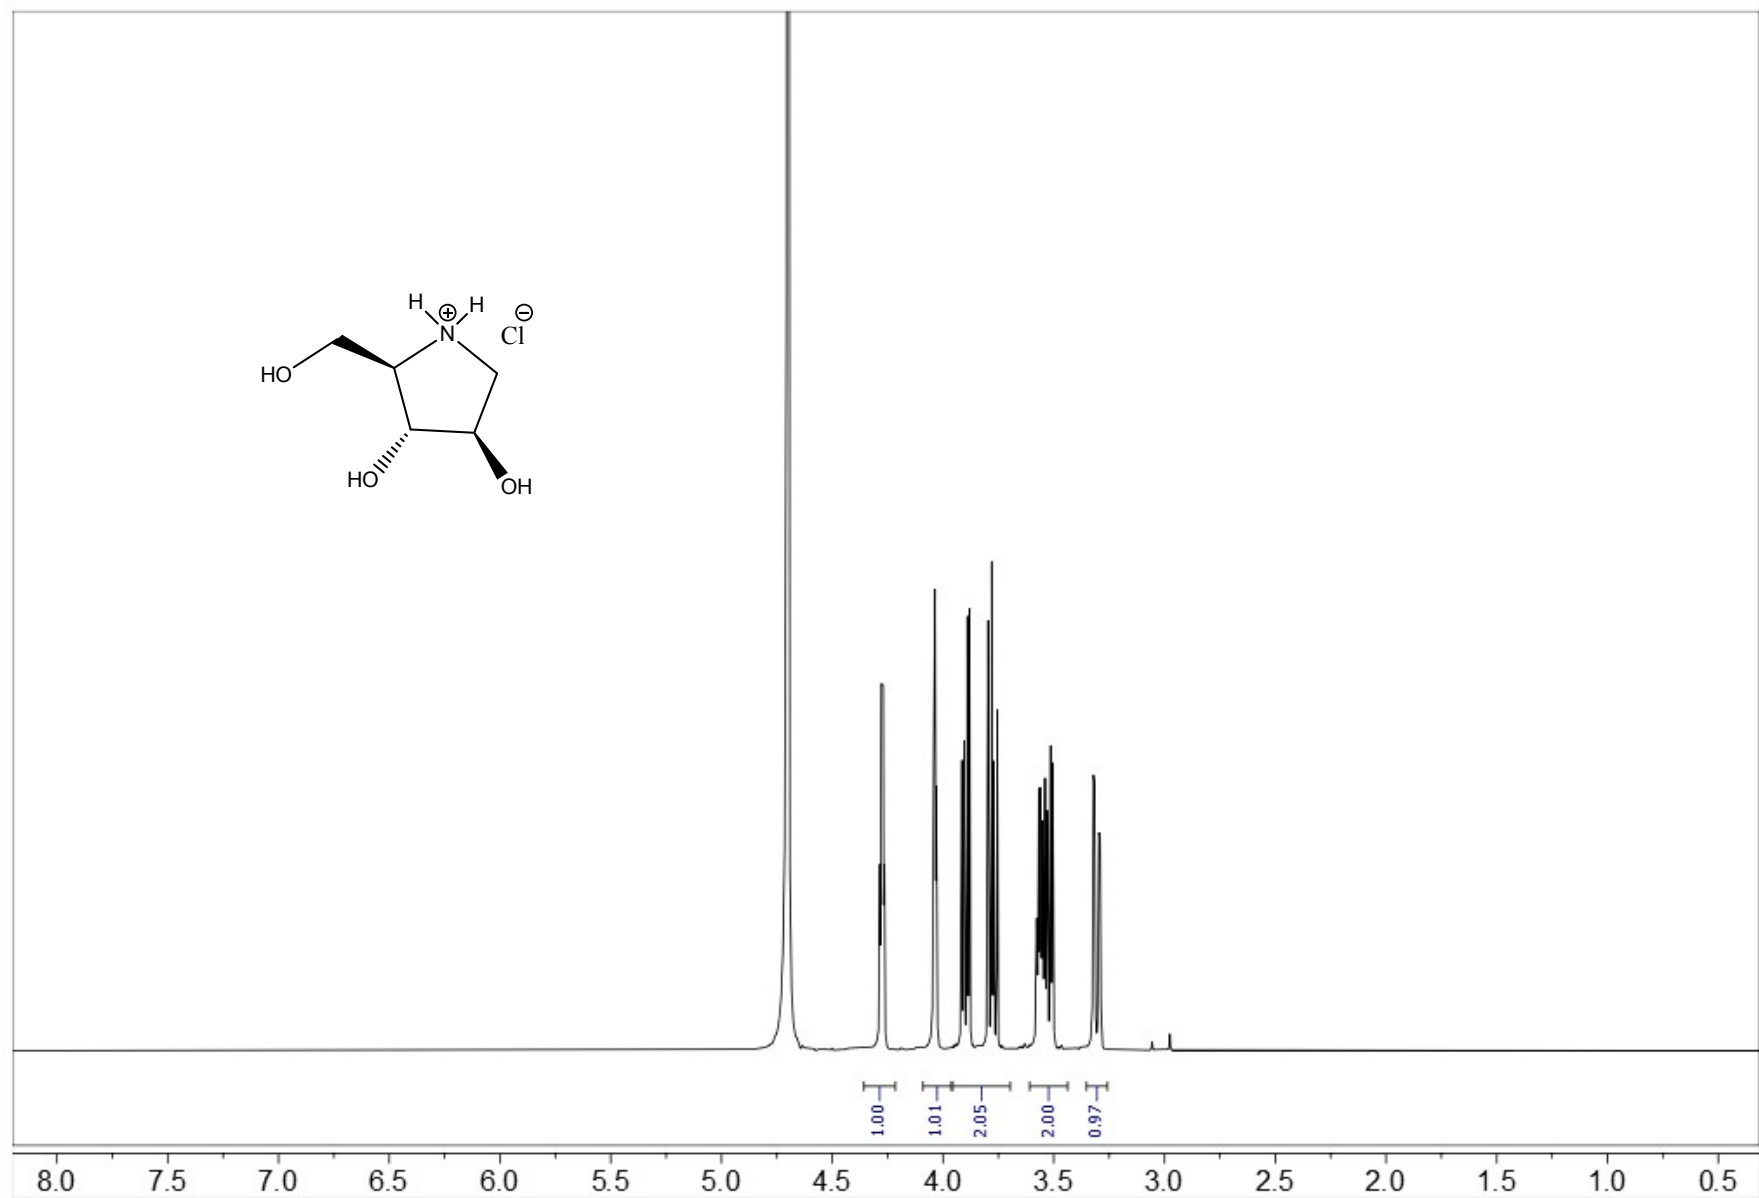

$^{13}\text{C}$ -NMR spectrum of DAB,HCl ( $\text{D}_2\text{O}$ )

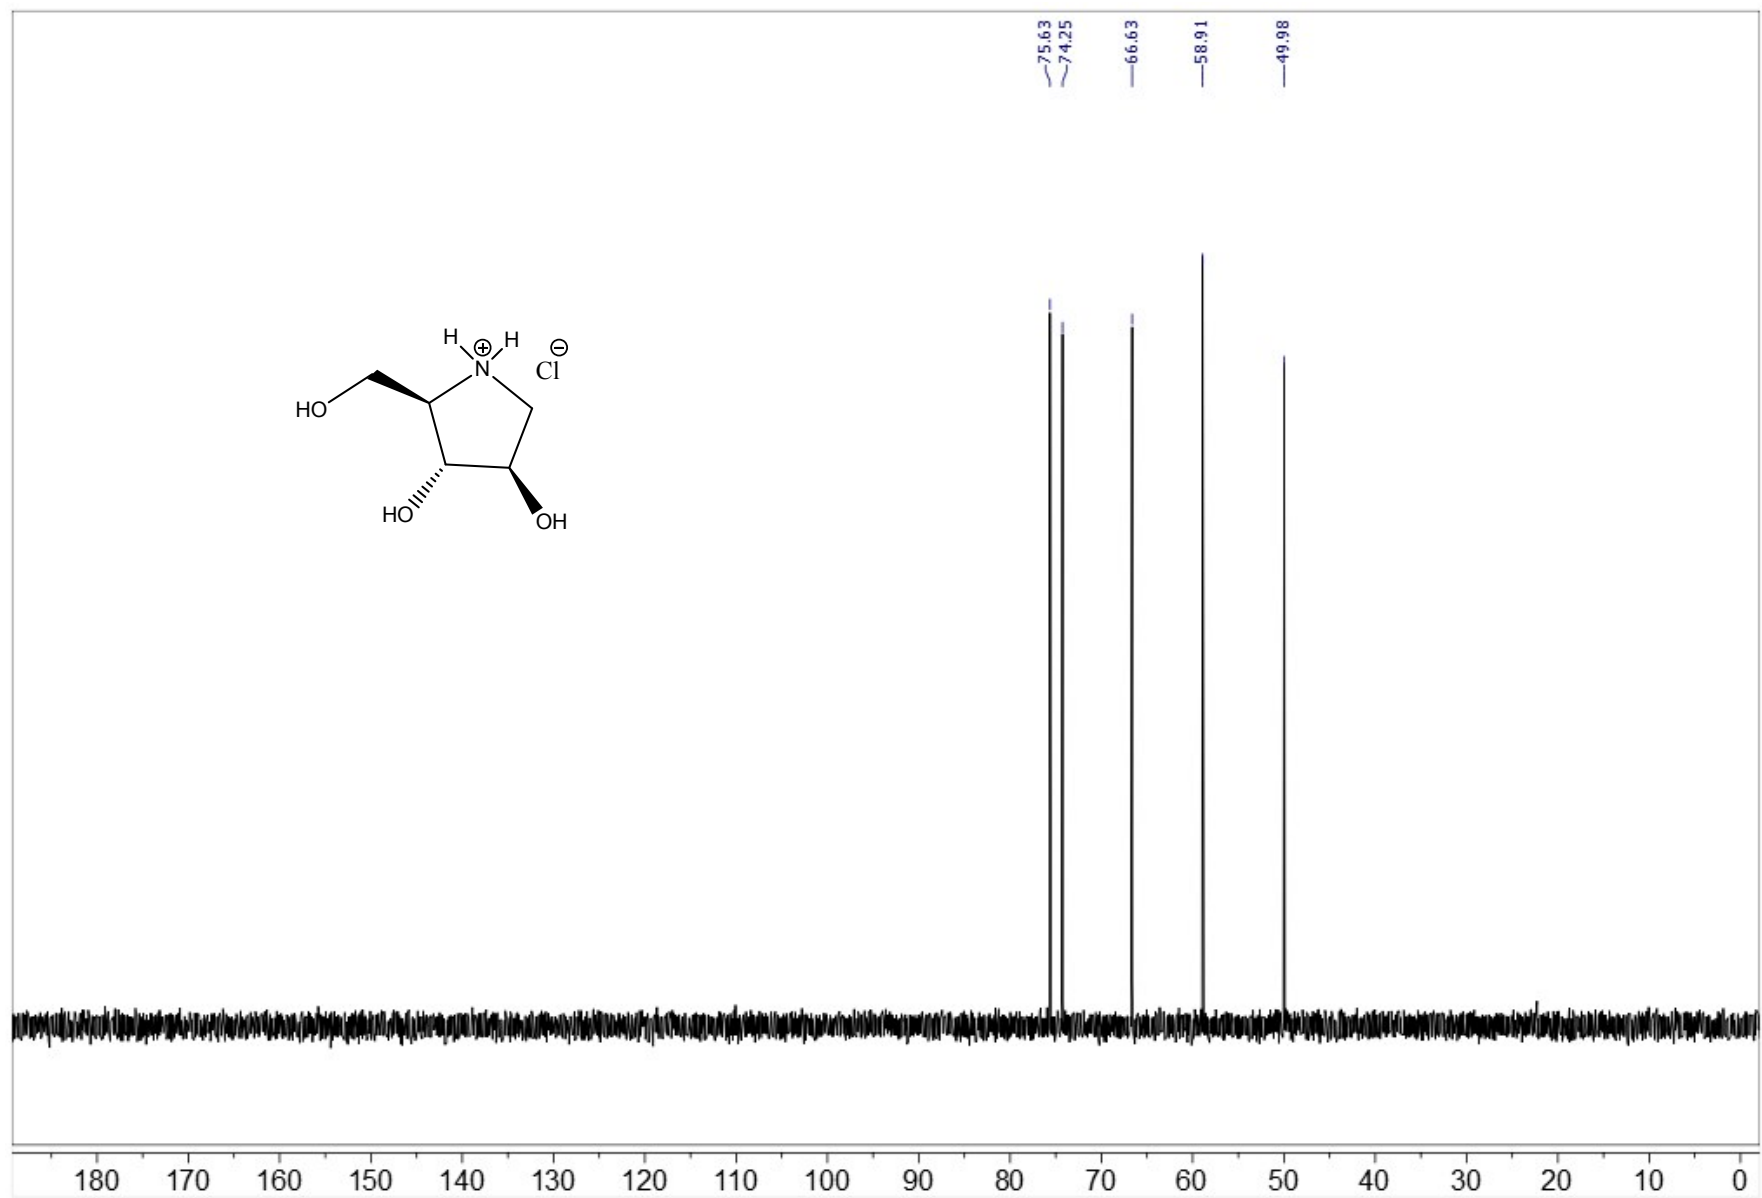

NOESY spectrum of 20b (CDCl<sub>3</sub>)

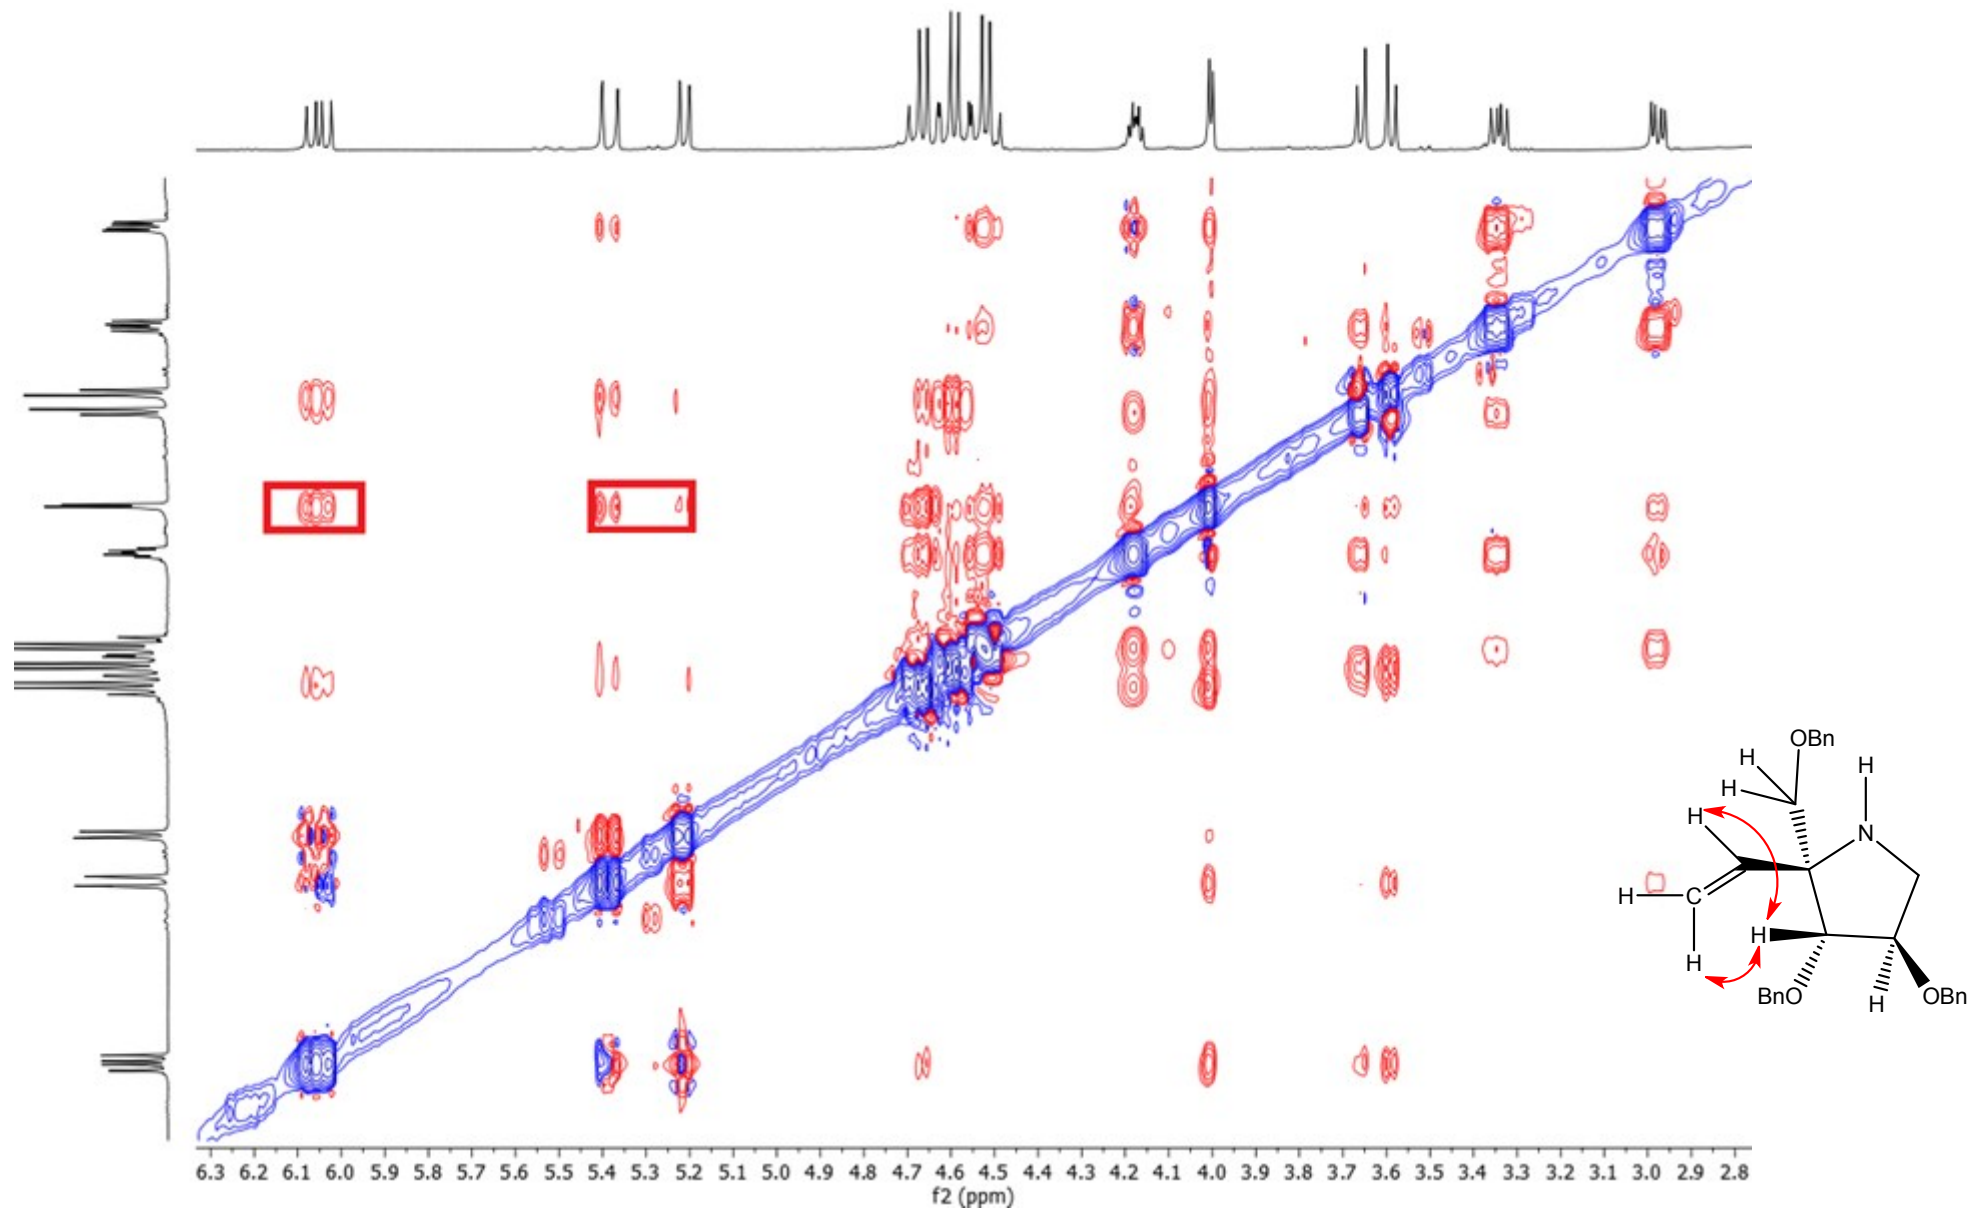

NOESY spectrum of 21b (CDCl<sub>3</sub>)

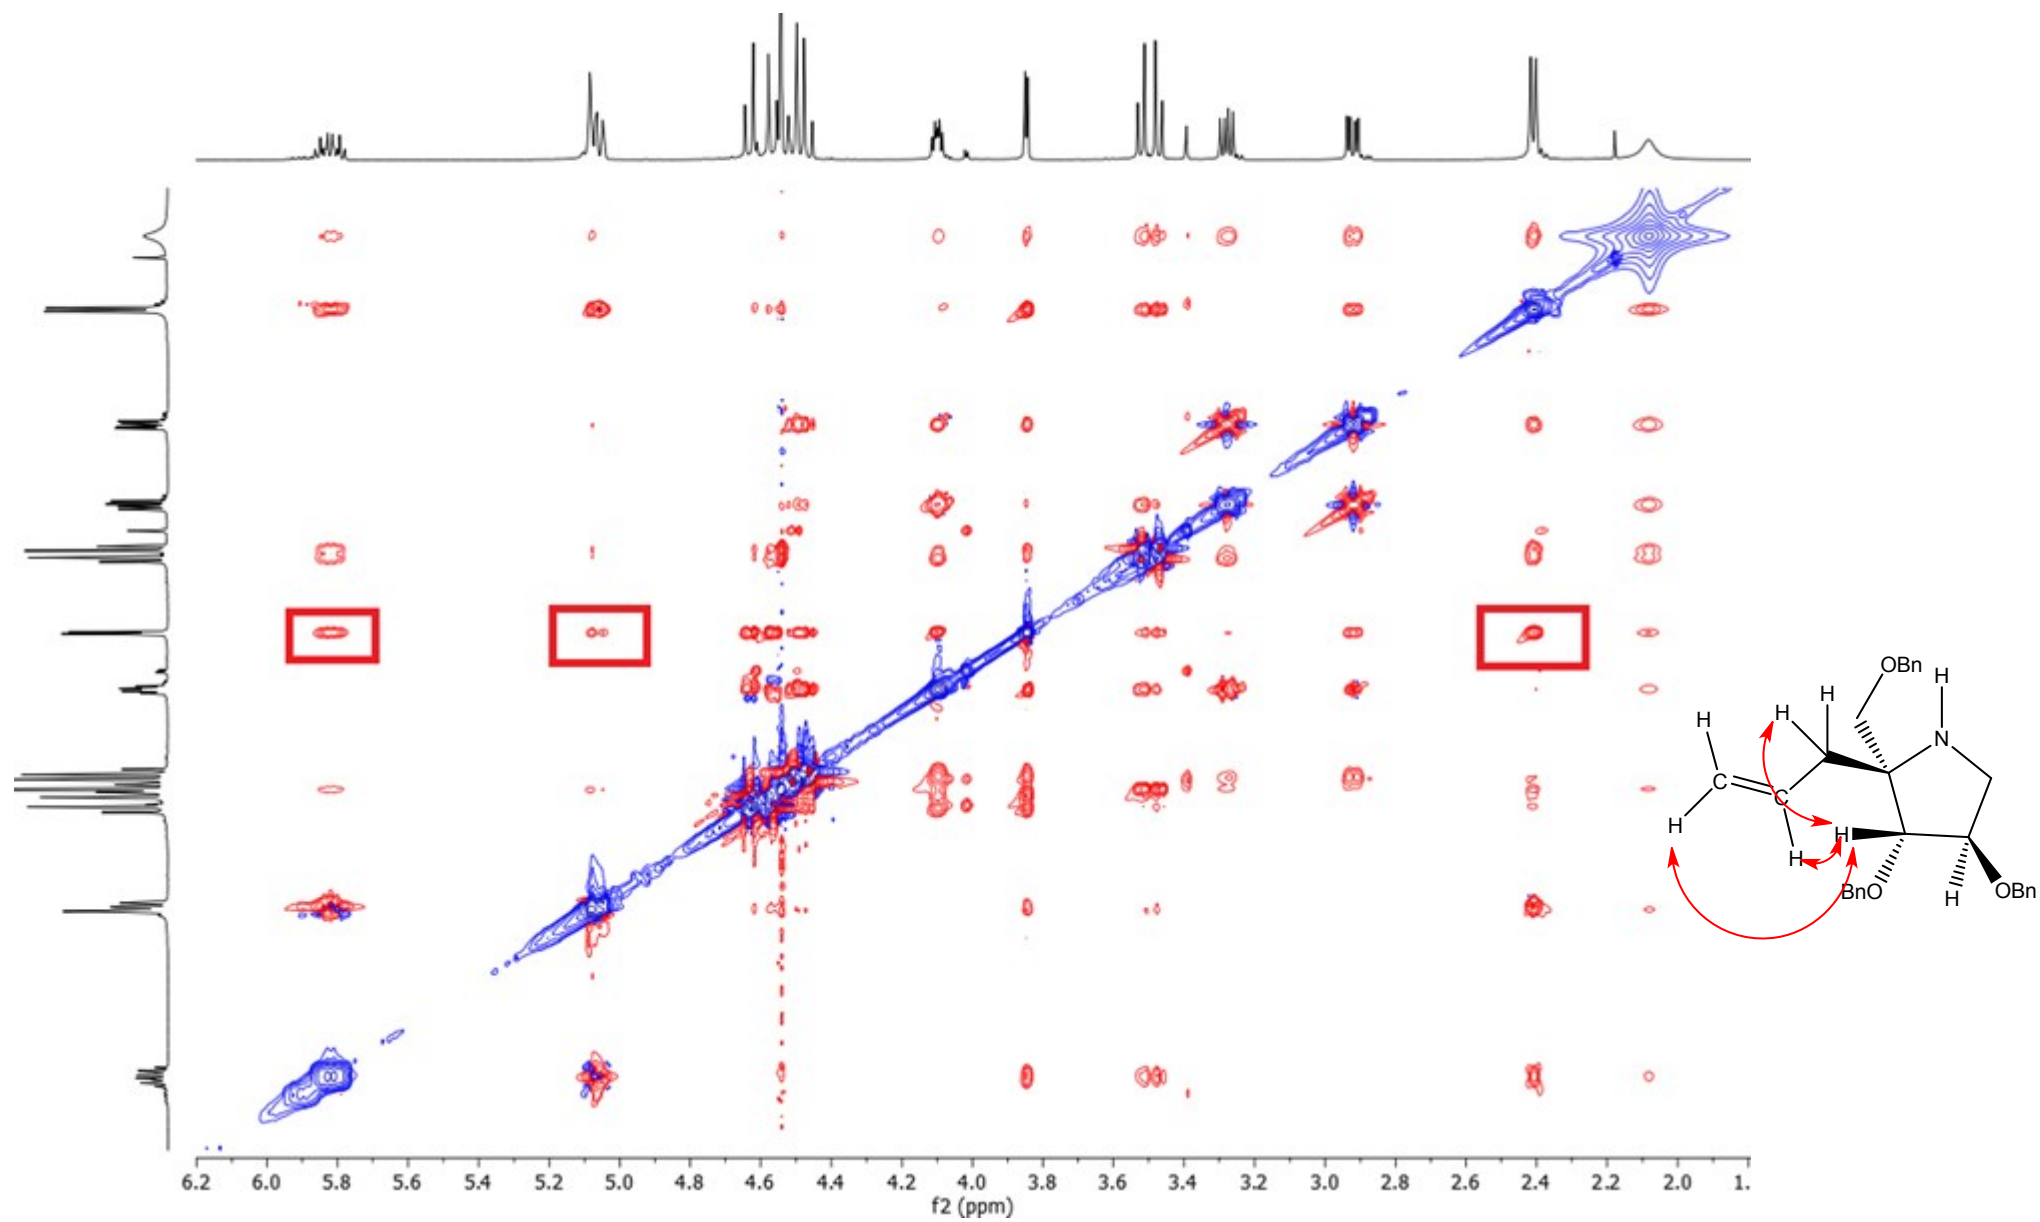



NOESY spectrum of 5b (D<sub>2</sub>O)

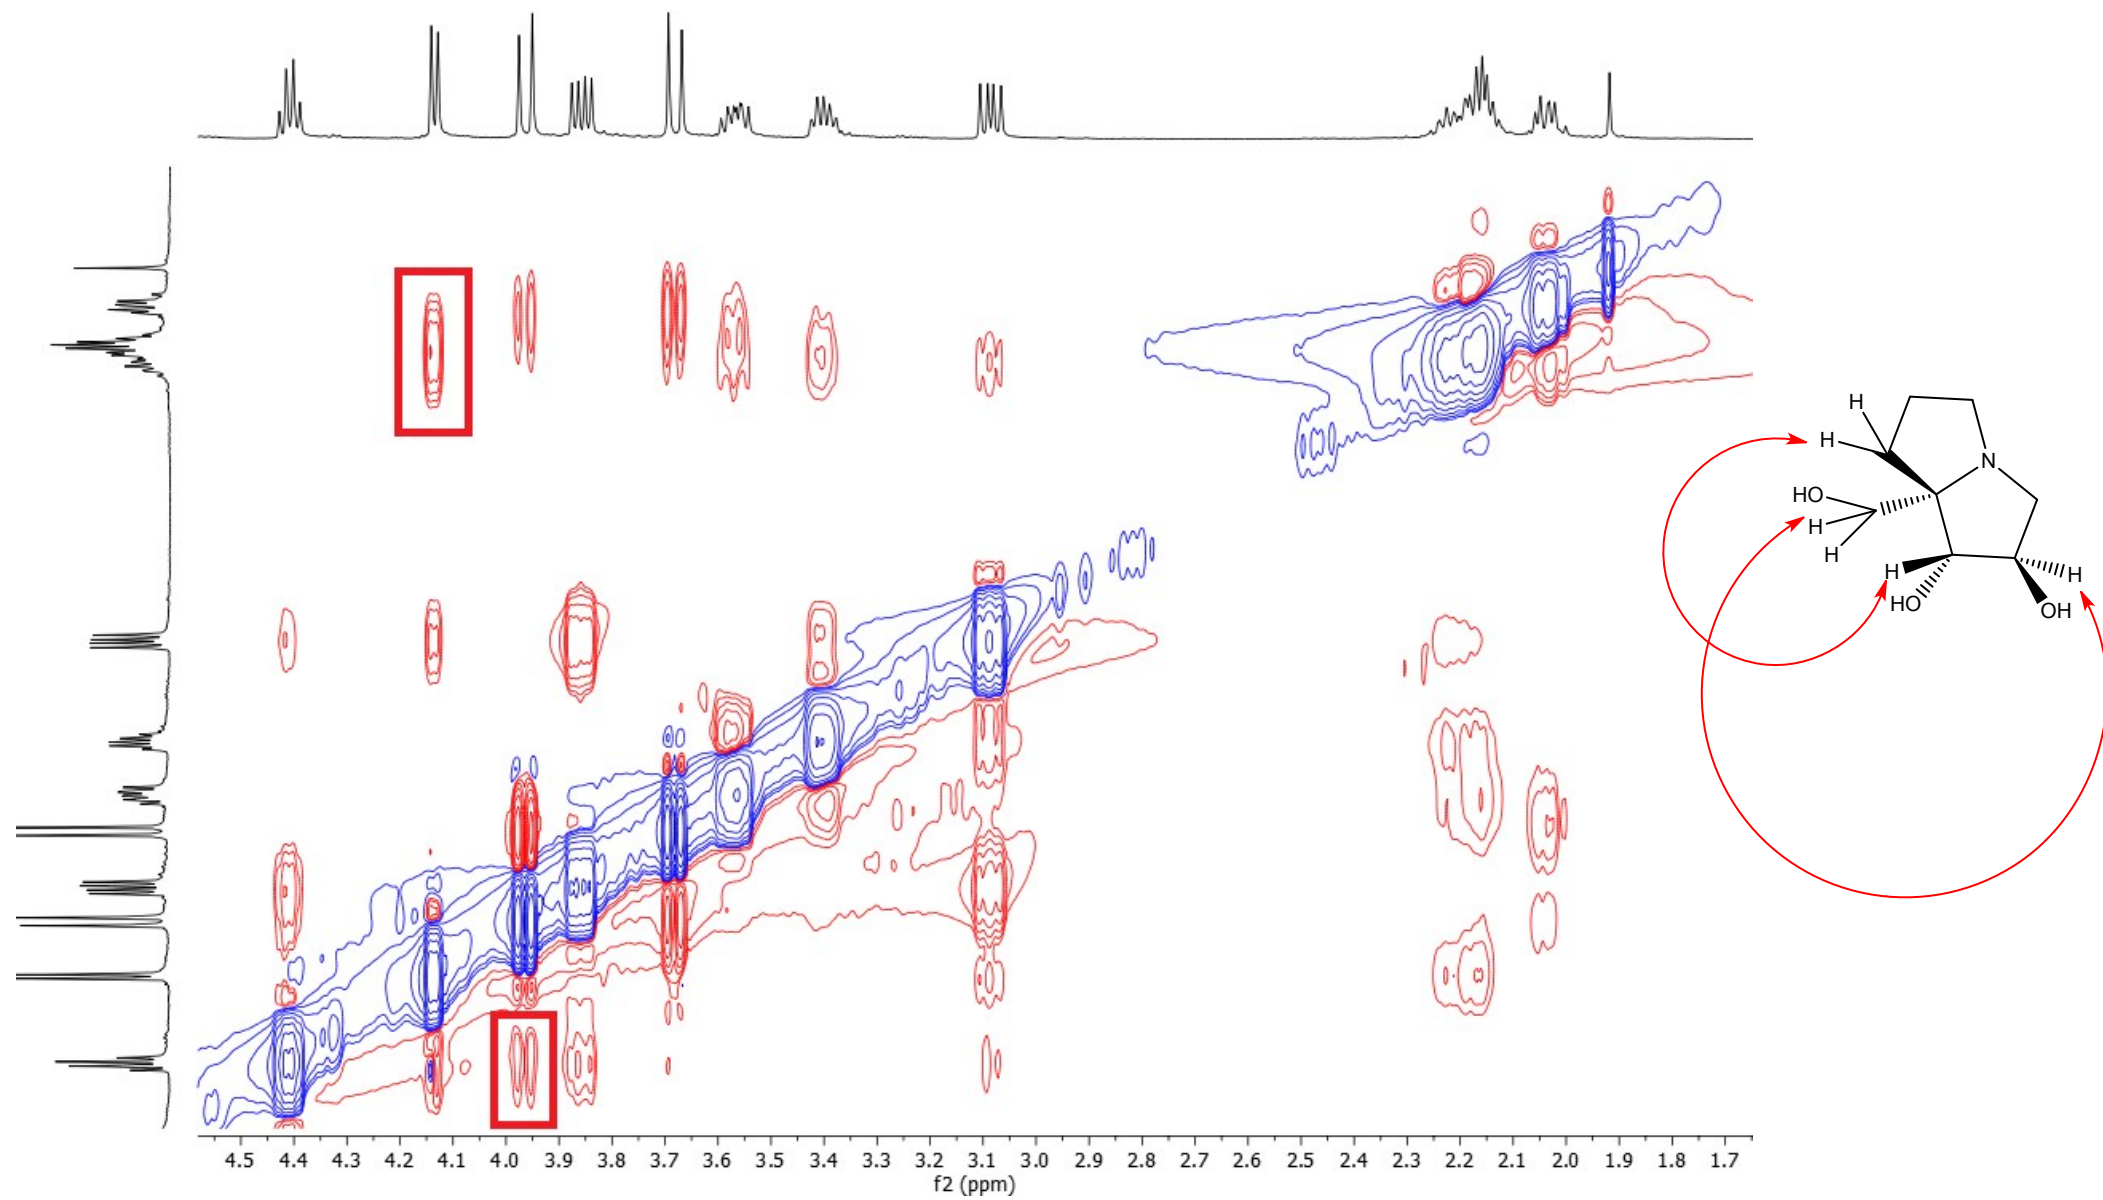

NOESY spectrum of 6a (D<sub>2</sub>O)

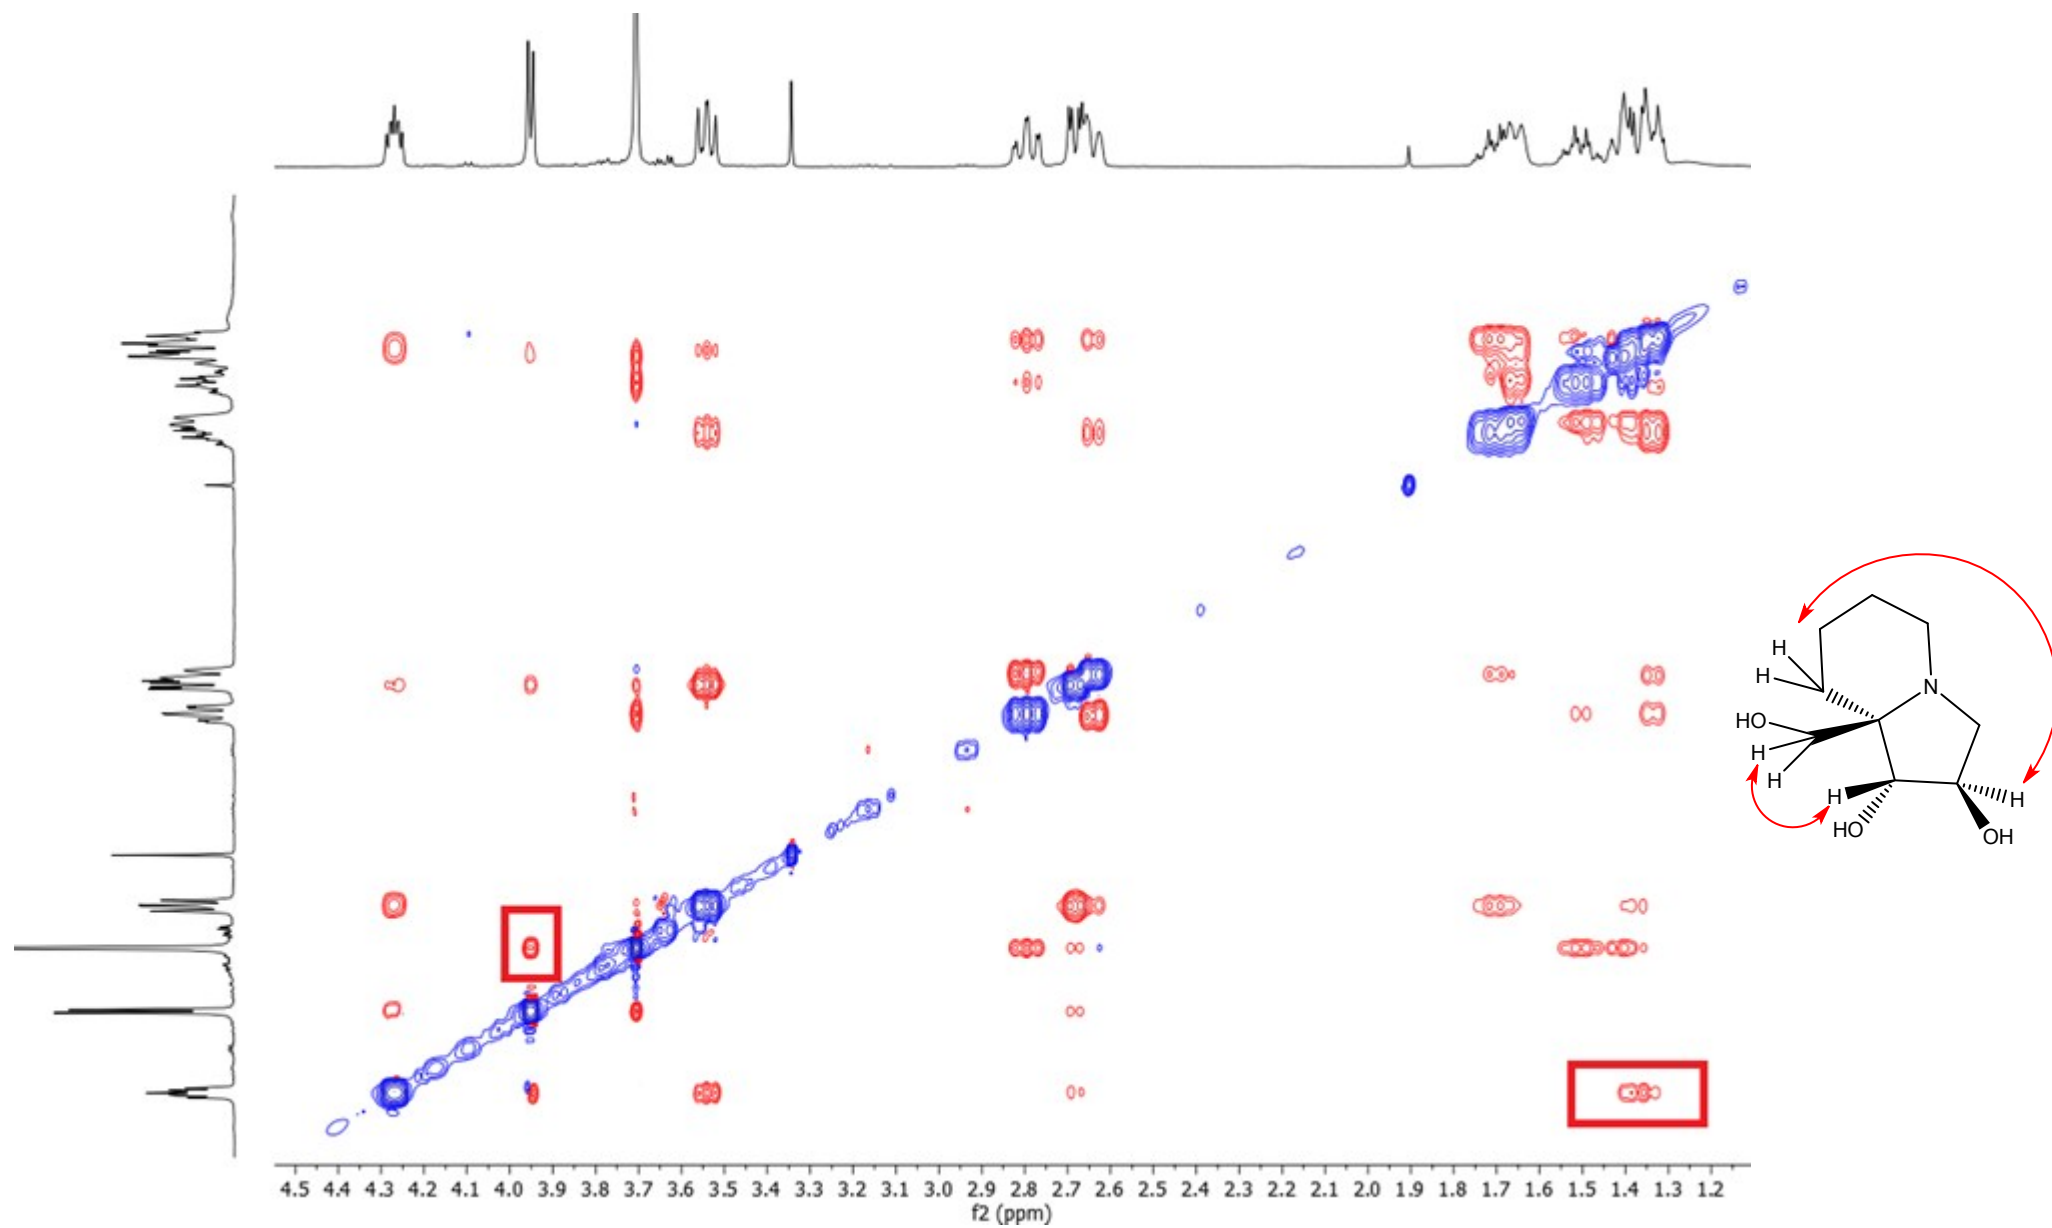

NOESY spectrum of 6b (D<sub>2</sub>O)

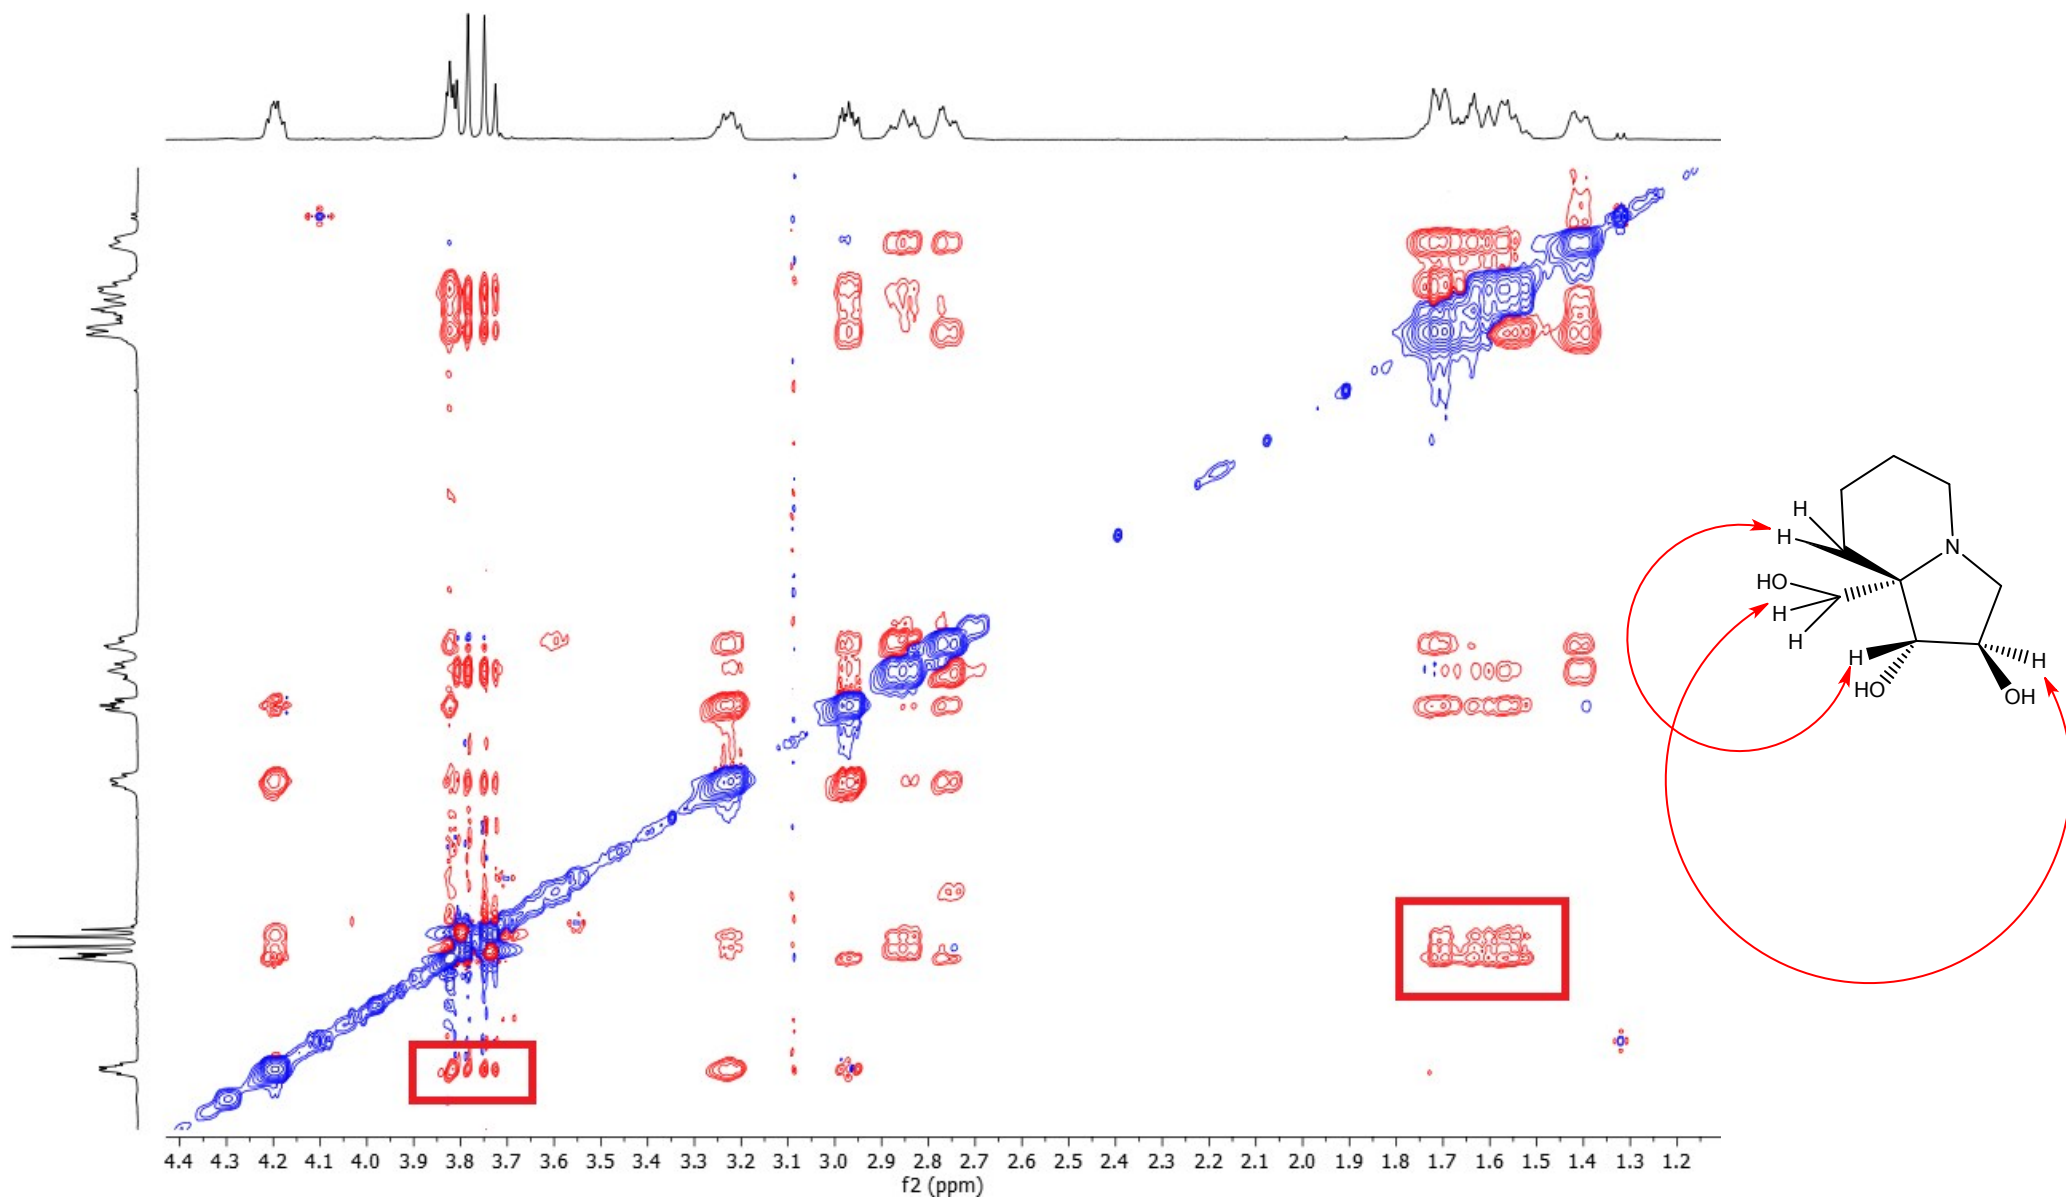

Supplement: c9ob01419e1.pdf [file c9ob01419e1.pdf]
